# Supplementary material for: High definition video loggers provide new insights into behaviour, physiology, and the oceanic habitat of a marine predator, the yellow-eyed penguin
Source: PeerJ. 2018 Sep 19;6:e5459. doi: 10.7717/peerj.5459 (PMC6151119; doi:10.7717/peerj.5459)
Supplement: Supplemental Information 1 [file peerj-06-5459-s001.xlsx]

## Sheet: dive data
birdID	TripNumber	EventNo	Date	SurfaceTime	NoFixes	FirstLat	FirstLon	LastLat	LastLon	SurfaceDist	SurfaceVelo	EvtOnset	EvtEnd	DiveTime		DiveDistance	EvtMaxDepth	DescDur	DescVelo	StartBot	NoWiggles	MeanWigAmp	MaxWigAmp	BottomTime	BottomEnd	AscDur	AscVelo	Benthic dive	diving efficiency	BottomDive	foraging effort	Time Spent at Seafloor	Hour Of The Day	CameraData	CamEvtStart	CamEvtEnd	Seafloor	PursuitAccell	PursuitStart	PursuitEnd	PursuitLocale	PursuitType	Exhalation	PreyEncounter		PreyEncounterEnd	PreyCapture	Species	seafloor type
21113	1	1	2015-12-18									05:30:58	05:31:19	20	23		1.2253	7	0.17505	1.2253	0			0	1.2253	15	0.081689	0		0		0	5	0
21113	1	2	2015-12-18	0	0							05:31:19	05:31:49	29	31		0.89921	21	0.042819	0.89921	0			0	0.89921	10	0.089921	0	1	0		0	5	0
21113	1	3	2015-12-18	0	0							05:31:49	05:32:19	29	31		0.8004	14	0.057171	0.8004	0			0	0.8004	17	0.047082	0	1	0		0	5	0
21113	1	4	2015-12-18	0	0							05:32:19	05:32:42	22	24		0.57313	6	0.095521	0.57313	0			0	0.57313	18	0.03184	0	1	0		0	5	0
21113	1	5	2015-12-18	5	0							05:32:47	05:33:03	15	17		1.3636	6	0.22727	1.3636	0			0	1.3636	11	0.12397	0	1.3333	0		0	5	0
21113	1	6	2015-12-18	0	0							05:33:03	05:33:21	17	19		2.2233	8	0.27792	2.2233	0			0	2.2233	11	0.20212	0	1	0		0	5	0
21113	1	7	2015-12-18	6	0							05:33:27	05:33:59	31	33		3.4091	13	0.26224	3.4091	0			0	3.4091	20	0.17046	0	1.1935	0		0	5	0
21113	1	8	2015-12-18	12	0							05:34:11	05:34:59	47	49		6.8774	13	0.45455	5.9091	6	0.1548	2.6877	20	6.8379	16	0.42737	1	1.2553	0		0	5	0
21113	1	9	2015-12-18	14	0							05:35:13	05:36:16	62	64		8.4288	11	0.65577	7.2134	15	0.081027	1.6601	40	8.4288	13	0.64837	1	1.2258	0		0	5	0
21113	1	10	2015-12-18	9	0							05:36:25	05:37:19	53	55		9.5652	12	0.71723	8.6067	11	0.087136	1.2846	29	9.5652	14	0.68323	1	1.1698	0		0	5	0
21113	1	11	2015-12-18	19	0							05:37:38	05:38:53	74	76		12.0948	14	0.67335	9.4268	10	0.25692	5.2965	51	11.996	11	1.0905	1	1.2568	1	12.0948	51	5	0
21113	1	12	2015-12-18	16	0							05:39:09	05:40:15	65	67		13.3992	27	0.48163	13.0039	6	-0.019767	4.1798	21	12.8853	19	0.67818	1	1.2462	1	13.3992	21	5	0
21113	1	13	2015-12-18	19	0							05:40:34	05:41:57	82	84		16.0968	14	0.82157	11.502	9	0.49956	8.3596	55	15.998	15	1.0665	1	1.2317	1	16.0968	55	5	0
21113	1	14	2015-12-18	17	0							05:42:14	05:43:28	73	75		17.8063	34	0.46879	15.9387	7	0.2668	4.4269	25	17.8063	16	1.1129	1	1.2329	1	17.8063	25	5	0
21113	1	15	2015-12-18	17	0							05:43:45	05:45:14	88	90		19.2095	20	0.56818	11.3636	15	0.52306	7.3715	54	19.2095	16	1.2006	1	1.1932	1	19.2095	54	5	0
21113	1	16	2015-12-18	41	0							05:45:55	05:47:16	80	82		14.4071	51	0.28249	14.4071	0			0	14.4071	31	0.46475	0	1.5125	1	14.4071	0	5	0
21113	1	17	2015-12-18	9	0							05:47:25	05:47:54	28	30		7.4407	15	0.49605	7.4407	0			0	7.4407	15	0.49605	0	1.3214	0		0	5	0
21113	1	18	2015-12-18	11	0							05:48:05	05:49:10	64	66		9.6443	33	0.28566	9.4269	6	-0.11693	3.9723	19	8.7253	14	0.62324	0	1.1719	0		0	5	0
21113	1	19	2015-12-18	15	0							05:49:25	05:50:18	52	54		7.7668	8	0.71393	5.7114	11	0.15272	2.9842	30	7.3913	16	0.46196	0	1.2885	0		0	5	0
21113	1	20	2015-12-18	14	0							05:50:32	05:50:54	21	23		4.8517	5	0.97035	4.8517	3	-0.3656	0.5238	5	3.7549	13	0.28884	0	1.6667	0		0	5	0
21113	1	21	2015-12-18	17	0							05:51:11	05:51:41	29	31		3.1423	6	0.47431	2.8458	5	0.0593	2.6779	17	3.1423	8	0.39279	0	1.5862	0		0	5	0
21113	1	22	2015-12-18	1	0							05:51:42	05:52:51	68	70		7.0652	28	0.25233	7.0652	0			0	7.0652	42	0.16822	0	1.0147	0		0	5	0
21113	1	23	2015-12-18	10	0							05:53:01	05:53:59	57	59		4.4565	13	0.34281	4.4565	14	-0.11223	2.5098	38	2.8853	8	0.36067	0	1.1754	0		0	5	0
21113	1	24	2015-12-18	6	0							05:54:05	05:54:40	34	36		7.747	22	0.35214	7.747	0			0	7.747	14	0.55336	0	1.1765	0		0	5	0
21113	1	25	2015-12-18	14	0							05:54:54	05:56:04	69	71		9.0711	23	0.3944	9.0711	0			0	9.0711	48	0.18898	0	1.2029	0		0	5	0
21113	1	26	2015-12-18	11	0							05:56:15	05:57:13	57	59		7.0257	13	0.4059	5.2766	3	0.35903	1.7885	23	6.3537	23	0.27625	0	1.193	0		0	5	0
21113	1	27	2015-12-18	24	0							05:57:37	05:57:52	14	16		1.8379	7	0.26256	1.8379	0			0	1.8379	9	0.20422	0	2.7143	0		0	5	0
21113	1	28	2015-12-18	12	0							05:58:04	05:59:07	62	64		10.1778	28	0.36349	10.1778	0			0	10.1778	36	0.28272	0	1.1935	0		0	5	0
21113	1	29	2015-12-18	8	0							05:59:15	05:59:51	35	37		4.3774	21	0.20845	4.3774	0			0	4.3774	16	0.27359	0	1.2286	0		0	5	0
21113	1	30	2015-12-18	6	0							05:59:57	06:00:51	53	55		8.1719	11	0.56953	6.2648	4	0.45208	2.8755	21	8.0731	23	0.35101	0	1.1132	0		0	5	0
21113	1	31	2015-12-18	14	0							06:01:05	06:01:58	52	54		10.7114	30	0.35705	10.7114	0			0	10.7114	24	0.44631	0	1.2692	0		0	6	0
21113	1	32	2015-12-18	31	0							06:02:29	06:02:56	26	28		3.1719	9	0.35244	3.1719	0			0	3.1719	19	0.16694	0	2.1923	0		0	6	0
21113	1	33	2015-12-18	12	0							06:03:08	06:03:56	47	49		10.6027	30	0.35342	10.6027	0			0	10.6027	19	0.55804	0	1.2553	0		0	6	0
21113	1	34	2015-12-18	8	0							06:04:04	06:05:15	70	72		11.9763	37	0.32368	11.9763	0			0	11.9763	35	0.34218	0	1.1143	0		0	6	0
21113	1	35	2015-12-18	17	0							06:05:32	06:06:59	86	88		12.3814	24	0.51589	12.3814	0			0	12.3814	64	0.19346	0	1.1977	0		0	6	0
21113	1	36	2015-12-18	14	0							06:07:13	06:08:24	70	72		9.3083	34	0.27377	9.3083	0			0	9.3083	38	0.24496	0	1.2	0		0	6	0
21113	1	37	2015-12-18	15	0							06:08:39	06:09:58	78	80		12.332	33	0.3737	12.332	0			0	12.332	47	0.26238	0	1.1923	0		0	6	0
21113	1	38	2015-12-18	15	0							06:10:13	06:11:42	88	90		16.4031	40	0.41008	16.4031	0			0	16.4031	50	0.32806	0	1.1705	0		0	6	0
21113	1	39	2015-12-18	24	0							06:12:06	06:13:50	103	105		31.7095	41	0.7734	31.7095	0			0	31.7095	64	0.49546	0	1.233	0		0	6	0
21113	1	40	2015-12-18	34	0							06:14:24	06:16:34	129	131		41.2944	39	1.0302	40.1778	10	0.10771	0.9288	40	41.2549	52	0.79336	1	1.2636	1	41.2944	40	6	0
21113	1	41	2015-12-18	53	0							06:17:27	06:19:11	103	105		18.913	46	0.41115	18.913	0			0	18.913	59	0.32056	0	1.5146	0		0	6	0
21113	1	42	2015-12-18	982	0							06:35:33	06:36:13	39	41		4.4466	20	0.22233	4.4466	0			0	4.4466	21	0.21174	0	26.1795	0		0	6	0
21113	1	43	2015-12-18	50	0							06:37:03	06:38:28	84	86		15.3854	30	0.51285	15.3854	0			0	15.3854	56	0.27474	0	1.5952	0		0	6	0
21113	1	44	2015-12-18	30	0							06:38:58	06:40:50	111	113		50.9585	55	0.90747	49.9111	8	0.12104	1.008	19	50.8794	39	1.3046	1	1.2703	1	50.9585	19	6	0
21113	1	45	2015-12-18	42	0							06:41:32	06:44:26	173	175		51.7095	40	1.271	50.8399	30	-0.03228	0.6621	92	49.8715	43	1.1598	1	1.2428	1	51.7095	92	6	0
21113	1	46	2015-12-18	38	0							06:45:04	06:47:40	155	157		51.3439	38	1.3288	50.4941	23	-0.016757	0.7905	78	50.1087	41	1.2222	1	1.2452	1	51.3439	78	6	0
21113	1	47	2015-12-18	45	0							06:48:25	06:50:42	136	138		51.5613	42	1.1884	49.9111	18	0.014272	1.0474	60	50.168	36	1.3936	1	1.3309	1	51.5613	60	6	0
21113	1	48	2015-12-18	46	0							06:51:28	06:54:07	158	160		52.2826	39	1.2848	50.1087	19	0.034326	1.6798	76	50.7609	45	1.128	1	1.2911	1	52.2826	76	6	0
21113	1	49	2015-12-18	31	0							06:54:38	06:55:44	65	67		6.7984	29	0.23443	6.7984	0			0	6.7984	38	0.17891	0	1.4769	0		0	6	0
21113	1	50	2015-12-18	32	0							06:56:16	06:58:44	147	149		52.7273	43	1.2143	52.2134	20	-0.00889	0.4941	61	52.0356	45	1.1563	1	1.2177	1	52.7273	61	6	0
21113	1	51	2015-12-18	49	0							06:59:33	07:02:12	158	160		53.498	37	1.397	51.6897	18	0	1.4822	79	51.6897	44	1.1748	1	1.3101	1	53.498	79	6	0
21113	1	52	2015-12-18	34	0							07:02:46	07:04:52	125	127		50.9684	36	1.3905	50.0593	18	0.031839	0.6917	78	50.6324	13	3.8948	1	1.272	1	50.9684	78	7	0
21113	1	53	2015-12-18	2	0							07:04:54	07:05:02	7	9		0.63241	7	0.090344	0.63241	0			0	0.63241	2	0.31621	0	1.2857	0		0	7	0
21113	1	54	2015-12-18	0	0							07:05:02	07:05:06	3	5		0.5336	3	0.17787	0.5336	0			0	0.5336	2	0.2668	0	1	0		0	7	0
21113	1	55	2015-12-18	0	0							07:05:06	07:05:12	5	7		0.62253	4	0.15563	0.62253	0			0	0.62253	3	0.20751	0	1	0		0	7	0
21113	1	56	2015-12-18	0	0							07:05:12	07:05:16	3	5		0.54348	2	0.27174	0.54348	0			0	0.54348	3	0.18116	0	1	0		0	7	0
21113	1	57	2015-12-18	169	0							07:08:05	07:08:50	44	46		8.8735	16	0.55459	8.8735	0			0	8.8735	30	0.29578	0	4.8409	0		0	7	0
21113	1	58	2015-12-18	27	0							07:09:17	07:10:20	62	64		11.6897	28	0.41749	11.6897	0			0	11.6897	36	0.32471	0	1.4355	0		0	7	0
21113	1	59	2015-12-18	28	0							07:10:48	07:12:23	94	96		51.1166	40	1.2129	48.5178	18	0.13395	1.5613	42	50.9289	14	3.6378	1	1.2979	1	51.1166	42	7	0
21113	1	60	2015-12-18	6	0							07:12:29	07:12:35	5	7		0.64229	3	0.2141	0.64229	0			0	0.64229	4	0.16057	0	2.2	0		0	7	0
21113	1	61	2015-12-18	0	0							07:12:35	07:12:40	4	6		0.96838	3	0.32279	0.96838	0			0	0.96838	3	0.32279	0	1	0		0	7	0
21113	1	62	2015-12-18	120	0							07:14:40	07:15:30	49	51		7.4901	20	0.3745	7.4901	0			0	7.4901	31	0.24162	0	3.449	0		0	7	0
21113	1	63	2015-12-18	29	0							07:15:59	07:16:47	47	49		4.8814	22	0.22188	4.8814	0			0	4.8814	27	0.18079	0	1.617	0		0	7	0
21113	1	64	2015-12-18	44	0							07:17:31	07:18:18	46	48		4.6443	23	0.20193	4.6443	0			0	4.6443	25	0.18577	0	1.9565	0		0	7	0
21113	1	65	2015-12-18	35	0							07:18:53	07:19:54	60	62		7.7174	25	0.3087	7.7174	0			0	7.7174	37	0.20858	0	1.5833	0		0	7	0
21113	1	66	2015-12-18	18	0							07:20:12	07:21:12	59	61		8.6462	34	0.2543	8.6462	0			0	8.6462	27	0.32023	0	1.3051	0		0	7	0
21113	1	67	2015-12-18	11	0							07:21:23	07:22:31	67	69		9.9901	27	0.37	9.9901	0			0	9.9901	42	0.23786	0	1.1642	0		0	7	0
21113	1	68	2015-12-18	31	0							07:23:02	07:24:57	114	116		53.7253	42	1.2684	53.2708	20	-0.058305	0.5929	59	52.1047	15	3.4736	1	1.2719	1	53.7253	59	7	0
21113	1	69	2015-12-18	77	0							07:26:14	07:27:03	48	50		6.7787	24	0.28245	6.7787	0			0	6.7787	26	0.26072	0	2.6042	0		0	7	0
21113	1	70	2015-12-18	23	0							07:27:26	07:28:24	57	59		6.413	24	0.26721	6.413	0			0	6.413	35	0.18323	0	1.4035	0		0	7	0
21113	1	71	2015-12-18	10	0							07:28:34	07:29:45	70	72		7.8261	38	0.20595	7.8261	0			0	7.8261	34	0.23018	0	1.1429	0		0	7	0
21113	1	72	2015-12-18	10	0							07:29:55	07:31:13	77	79		10.7115	34	0.31504	10.7115	0			0	10.7115	45	0.23803	0	1.1299	0		0	7	0
21113	1	73	2015-12-18	10	0							07:31:23	07:32:38	74	76		10.2866	38	0.2707	10.2866	0			0	10.2866	38	0.2707	0	1.1351	0		0	7	0
21113	1	74	2015-12-18	10	0							07:32:48	07:34:16	87	89		12.2134	49	0.24925	12.2134	0			0	12.2134	40	0.30534	0	1.1149	0		0	7	0
21113	1	75	2015-12-18	22	0							07:34:38	07:36:10	91	93		14.2391	46	0.30955	14.2391	0			0	14.2391	47	0.30296	0	1.2418	0		0	7	0
21113	1	76	2015-12-18	16	0							07:36:26	07:38:02	95	97		14.9407	56	0.2668	14.9407	0			0	14.9407	41	0.36441	0	1.1684	0		0	7	0
21113	1	77	2015-12-18	25	0							07:38:27	07:40:56	148	150		52.0158	36	1.4062	50.6225	20	-0.032114	1.3637	65	49.9802	49	1.02	1	1.1689	1	52.0158	65	7	0
21113	1	78	2015-12-18	25	0							07:41:21	07:42:41	79	81		11.9269	30	0.39756	11.9269	0			0	11.9269	51	0.23386	0	1.3165	0		0	7	0
21113	1	79	2015-12-18	29	0							07:43:10	07:45:27	136	138		51.0869	38	1.3148	49.9605	31	0.022629	0.9387	81	50.662	19	2.6664	1	1.2132	1	51.0869	81	7	0
21113	1	80	2015-12-18	0	0							07:45:27	07:45:33	5	7		0.73123	4	0.18281	0.73123	0			0	0.73123	3	0.24374	0	1	0		0	7	0
21113	1	81	2015-12-18	17	0							07:45:50	07:46:18	27	29		4.6047	9	0.51164	4.6047	0			0	4.6047	20	0.23024	0	1.6296	0		0	7	0
21113	1	82	2015-12-18	20	0							07:46:38	07:47:17	38	40		6.4624	17	0.38014	6.4624	0			0	6.4624	23	0.28097	0	1.5263	0		0	7	0
21113	1	83	2015-12-18	14	0							07:47:31	07:47:55	23	25		2.7964	6	0.46607	2.7964	0			0	2.7964	19	0.14718	0	1.6087	0		0	7	0
21113	1	84	2015-12-18	14	0							07:48:09	07:48:52	42	44		7.6778	19	0.4041	7.6778	0			0	7.6778	25	0.30711	0	1.3333	0		0	7	0
21113	1	85	2015-12-18	19	0							07:49:11	07:49:56	44	46		5.9782	14	0.42702	5.9782	0			0	5.9782	32	0.18682	0	1.4318	0		0	7	0
21113	1	86	2015-12-18	0	0							07:49:56	07:50:09	12	14		1.2352	5	0.24704	1.2352	0			0	1.2352	9	0.13724	0	1	0		0	7	0
21113	1	87	2015-12-18	15	0							07:50:24	07:51:35	70	72		12.3221	28	0.44008	12.3221	0			0	12.3221	44	0.28005	0	1.2143	0		0	7	0
21113	1	88	2015-12-18	16	0							07:51:51	07:53:11	79	81		11.4427	31	0.36912	11.4427	0			0	11.4427	50	0.22885	0	1.2025	0		0	7	0
21113	1	89	2015-12-18	15	0							07:53:26	07:54:27	60	62		10.3162	23	0.44853	10.3162	0			0	10.3162	39	0.26452	0	1.25	0		0	7	0
21113	1	90	2015-12-18	35	0							07:55:02	07:57:17	134	136		53.8142	36	1.4248	51.2945	14	0.098107	2.0849	54	52.668	46	1.145	1	1.2612	1	53.8142	54	7	0
21113	1	91	2015-12-18	38	0							07:57:55	08:00:09	133	135		54.496	37	1.444	53.4289	20	-0.006425	1.1758	84	53.3004	14	3.8072	1	1.2857	1	54.496	84	7	0
21113	1	92	2015-12-18	2	0							08:00:11	08:00:16	4	6		0.60277	5	0.12055	0.60277	0			0	0.60277	1	0.60277	0	1.5	0		0	8	0
21113	1	93	2015-12-18	24	0							08:00:40	08:01:09	28	30		5.5435	12	0.46196	5.5435	0			0	5.5435	18	0.30797	0	1.8571	0		0	8	0
21113	1	94	2015-12-18	47	0							08:01:56	08:02:48	51	53		11.6008	26	0.44618	11.6008	0			0	11.6008	27	0.42966	0	1.9216	0		0	8	0
21113	1	95	2015-12-18	13	0							08:03:01	08:03:36	34	36		5.1087	13	0.39298	5.1087	0			0	5.1087	23	0.22212	0	1.3824	0		0	8	0
21113	1	96	2015-12-18	18	0							08:03:54	08:04:29	34	36		12.8755	18	0.71531	12.8755	0			0	12.8755	18	0.71531	0	1.5294	0		0	8	0
21113	1	97	2015-12-18	13	0							08:04:42	08:05:45	62	64		11.9763	29	0.41298	11.9763	0			0	11.9763	35	0.34218	0	1.2097	0		0	8	0
21113	1	98	2015-12-18	22	0							08:06:07	08:07:33	85	87		17.3715	36	0.48254	17.3715	0			0	17.3715	51	0.34062	0	1.2588	0		0	8	0
21113	1	99	2015-12-18	29	0							08:08:02	08:10:13	130	132		55.415	37	1.4651	54.2095	26	0.013681	1.9268	77	54.5652	18	3.0314	1	1.2231	1	55.415	77	8	0
21113	1	100	2015-12-18	33	0							08:10:46	08:11:55	68	70		13.2016	31	0.42586	13.2016	0			0	13.2016	39	0.3385	0	1.4853	0		0	8	0
21113	1	101	2015-12-18	41	0							08:12:36	08:15:23	166	168		56.2451	36	1.5385	55.3854	36	0.0098806	1.077	86	55.7411	46	1.2118	1	1.247	1	56.2451	86	8	0
21113	1	102	2015-12-18	48	0							08:16:11	08:18:23	131	133		55.5336	34	1.6223	55.1581	34	-0.019474	0.5928	81	54.496	18	3.0276	1	1.3664	1	55.5336	81	8	0
21113	1	103	2015-12-18	26	0							08:18:49	08:19:32	42	44		8.4486	19	0.44466	8.4486	0			0	8.4486	25	0.33794	0	1.619	0		0	8	0
21113	1	104	2015-12-18	43	0							08:20:15	08:22:45	149	151		55.3953	36	1.5058	54.2095	28	0.040936	0.662	72	55.3557	43	1.2873	1	1.2886	1	55.3953	72	8	0
21113	1	105	2015-12-18	48	0							08:23:33	08:25:24	110	112		55.6423	34	1.6162	54.9506	22	0.022009	1.2055	57	55.4348	21	2.6398	1	1.4364	1	55.6423	57	8	0
21113	1	106	2015-12-18	58	0							08:26:22	08:28:34	131	133		55.6423	34	1.6162	54.9506	20	0.00395	0.5929	60	55.0296	39	1.411	1	1.4427	1	55.6423	60	8	0
21113	1	107	2015-12-18	26	0							08:29:00	08:30:17	76	78		14.9308	35	0.42659	14.9308	0			0	14.9308	43	0.34723	0	1.3421	0		0	8	0
21113	1	108	2015-12-18	29	0							08:30:46	08:33:31	164	166		54.8419	36	1.511	54.3972	28	-0.045525	0.4447	91	53.1225	39	1.3621	1	1.1768	1	54.8419	91	8	0
21113	1	109	2015-12-18	56	0							08:34:27	08:37:06	158	160		53.1522	35	1.4876	52.0652	31	0.016894	1.087	87	52.5889	38	1.3839	1	1.3544	1	53.1522	87	8	0
21113	1	110	2015-12-18	47	0							08:37:53	08:40:25	151	153		53.5474	32	1.624	51.9664	28	0.020468	0.9585	81	52.5395	40	1.3135	1	1.3113	1	53.5474	81	8	0
21113	1	111	2015-12-18	50	0							08:41:15	08:43:52	156	158		52.1146	33	1.5661	51.6798	34	-0.0017412	1.1067	88	51.6206	37	1.3952	1	1.3205	1	52.1146	88	8	0
21113	1	112	2015-12-18	1977	0							09:16:49	09:19:04	134	136		58.3597	43	1.3117	56.4032	10	0.10375	1.6106	37	57.4407	56	1.0257	1	15.7537	1	58.3597	37	9	0
21113	1	113	2015-12-18	46	0							09:19:50	09:22:07	136	138		58.834	40	1.4476	57.9051	24	0.0028833	0.9289	67	57.9743	31	1.8701	1	1.3382	1	58.834	67	9	0
21113	1	114	2015-12-18	90	0							09:23:37	09:25:45	127	129		57.8557	42	1.3554	56.9269	20	-0.03261	0.9288	66	56.2747	21	2.6797	1	1.7087	1	57.8557	66	9	0
21113	1	115	2015-12-18	107	0							09:27:32	09:29:48	135	137		57.1047	38	1.4703	55.8696	22	0.014373	0.8498	57	56.1858	42	1.3378	1	1.7926	1	57.1047	57	9	0
21113	1	116	2015-12-18	61	0							09:30:49	09:33:16	146	148		56.7491	38	1.4783	56.1759	20	-0.009385	0.5732	62	55.9882	48	1.1664	1	1.4178	1	56.7491	62	9	0
21113	1	117	2015-12-18	63	0							09:34:19	09:36:42	142	144		56.7293	35	1.561	54.6344	24	0.077404	1.6799	58	56.4921	51	1.1077	1	1.4437	1	56.7293	58	9	0
21113	1	118	2015-12-18	58	0							09:37:40	09:40:10	149	151		56.8182	36	1.5659	56.3736	22	-0.034586	1.1067	57	55.6127	58	0.95884	1	1.3893	1	56.8182	57	9	0
21113	1	119	2015-12-18	44	0							09:40:54	09:42:55	120	122		56.5168	34	1.6381	55.6967	18	0.021956	0.8201	68	56.0919	20	2.8046	1	1.3667	1	56.5168	68	9	0
21113	1	120	2015-12-18	77	0							09:44:12	09:46:05	112	114		56.1117	35	1.5806	55.3212	16	-0.020381	1.166	56	54.9951	23	2.3911	1	1.6875	1	56.1117	56	9	0
21113	1	121	2015-12-18	74	0							09:47:19	09:48:32	72	74		10.7065	26	0.41179	10.7065	0			0	10.7065	48	0.22305	0	2.0278	0		0	9	0
21113	1	122	2015-12-18	38	0							09:49:10	09:51:38	147	149		56.0129	37	1.4901	55.1334	18	0.033764	0.8399	50	55.7411	62	0.89905	1	1.2585	1	56.0129	50	9	0
21113	1	123	2015-12-18	38	0							09:52:16	09:54:55	158	160		56.0375	35	1.5748	55.1185	16	0.025944	0.8103	63	55.5336	62	0.8957	1	1.2405	1	56.0375	63	9	0
21113	1	124	2015-12-18	47	0							09:55:42	09:58:01	138	140		56.1166	36	1.5253	54.911	20	0.04842	0.919	74	55.8794	30	1.8626	1	1.3406	1	56.1166	74	9	0
21113	1	125	2015-12-18	76	0							09:59:17	10:01:09	111	113		56.245	37	1.4876	55.0395	16	-0.0043262	1.2055	39	54.9703	37	1.4857	1	1.6847	1	56.245	39	9	0
21113	1	126	2015-12-18	61	0							10:02:10	10:04:41	150	152		56.4427	37	1.4982	55.4348	28	0.0049393	0.8893	71	55.5731	44	1.263	1	1.4067	1	56.4427	71	10	0
21113	1	127	2015-12-18	54	0							10:05:35	10:08:18	162	164		57.0059	36	1.5635	56.2846	32	0.013588	0.494	69	56.7194	59	0.96135	1	1.3333	1	57.0059	69	10	0
21113	1	128	2015-12-18	50	0							10:09:08	10:11:44	155	157		57.8162	35	1.5923	55.7312	16	0.11364	1.2945	65	57.5495	57	1.0096	1	1.3226	1	57.8162	65	10	0
21113	1	129	2015-12-18	47	0							10:12:31	10:14:50	138	140		58.7056	38	1.5282	58.0732	31	0.014342	0.6917	65	58.5178	37	1.5816	1	1.3406	1	58.7056	65	10	0
21113	1	130	2015-12-18	54	0							10:15:44	10:18:22	157	159		60.5139	37	1.5957	59.0415	26	0.042188	0.7115	78	60.1384	44	1.3668	1	1.3439	1	60.5139	78	10	0
21113	1	131	2015-12-18	54	0							10:19:16	10:21:39	142	144		61.7194	39	1.5572	60.7313	30	0.026678	0.6818	66	61.5316	39	1.5777	1	1.3803	1	61.7194	66	10	0
21113	1	132	2015-12-18	57	0							10:22:36	10:25:06	149	151		62.1344	38	1.6211	61.6008	30	0.0065867	1.0573	71	61.7984	42	1.4714	1	1.3826	1	62.1344	71	10	0
21113	1	133	2015-12-18	48	0							10:25:54	10:28:25	150	152		61.8775	36	1.7122	61.6403	36	-0.047211	0.3162	80	59.9407	36	1.665	1	1.32	1	61.8775	80	10	0
21113	1	134	2015-12-18	51	0							10:29:16	10:31:47	150	152		59.5751	37	1.6069	59.4565	38	-0.064229	0.5434	90	57.0158	25	2.2806	1	1.34	1	59.5751	90	10	0
21113	1	135	2015-12-18	76	0							10:33:03	10:35:11	127	129		56.1561	33	1.6864	55.6522	14	-0.039529	0.5039	46	55.0988	50	1.102	1	1.5984	1	56.1561	46	10	0
21113	1	136	2015-12-18	86	0							10:36:37	10:38:57	139	141		54.9012	36	1.5195	54.7036	18	-0.059289	0.7905	55	53.6364	50	1.0727	1	1.6187	1	54.9012	55	10	0
21113	1	137	2015-12-18	74	0							10:40:11	10:42:11	119	121		54.0711	35	1.539	53.8636	12	-0.050225	1.1067	49	53.2609	37	1.4395	1	1.6218	1	54.0711	49	10	0
21113	1	138	2015-12-18	66	0							10:43:17	10:45:36	138	140		54.2095	39	1.3862	54.0613	20	-0.010375	1.0671	50	53.8538	51	1.056	1	1.4783	1	54.2095	50	10	0
21113	1	139	2015-12-18	47	0							10:46:23	10:48:33	129	131		54.6047	31	1.7407	53.9625	20	0.008395	0.7708	60	54.1304	40	1.3533	1	1.3643	1	54.6047	60	10	0
21113	1	140	2015-12-18	51	0							10:49:24	10:51:46	141	143		54.5553	32	1.6839	53.8834	22	0.0089818	0.5929	68	54.081	43	1.2577	1	1.3617	1	54.5553	68	10	0
21113	1	141	2015-12-18	51	0							10:52:37	10:55:00	142	144		55.2372	33	1.6505	54.4664	42	0.015764	0.7807	65	55.1285	46	1.1984	1	1.3592	1	55.2372	65	10	0
21113	1	142	2015-12-18	49	0							10:55:49	10:58:13	143	145		55.9486	34	1.6252	55.2569	23	0.024491	0.6028	68	55.8202	43	1.2981	1	1.3427	1	55.9486	68	10	0
21113	1	143	2015-12-18	52	0							10:59:05	11:01:07	121	123		54.8419	34	1.4741	50.1186	2	2.2382	4.7233	15	54.5949	74	0.73777	1	1.4298	1	54.8419	15	10	1		11:01:33	0	1	11:01:18	11:01:25			1	0			0
21113	1	144	2015-12-18	0	0							11:01:07	11:01:15	7	9		0.70159	4	0.1754	0.70159	0			0	0.70159	5	0.14032	0	1	0		0	11	1	11:01:33	11:01:40	0	0						0			0
21113	1	145	2015-12-18	0	0							11:01:15	11:01:42	26	28		2.2431	20	0.11215	2.2431	0			0	2.2431	8	0.28038	0	1	0		0	11	1	11:01:40	11:02:08	0	0						0			0
21113	1	146	2015-12-18	14	0							11:01:56	11:02:59	62	64		8.8439	30	0.2948	8.8439	0			0	8.8439	34	0.26011	0	1.2258	0		0	11	1	11:02:23	11:03:25	0	0						0			0
21113	1	147	2015-12-18	62	0							11:04:01	11:05:18	76	78		10.1878	26	0.39184	10.1878	0			0	10.1878	52	0.19592	0	1.8158	0		0	11	1	11:04:27	11:05:44	0	0						0			0
21113	1	148	2015-12-18	19	0							11:05:37	11:06:42	64	66		10.4645	33	0.3171	10.4645	0			0	10.4645	33	0.3171	0	1.2969	0		0	11	1	11:06:03	11:07:08	0	0						0			0
21113	1	149	2015-12-18	36	0							11:07:18	11:09:18	119	121		55.0297	38	1.4229	54.0712	12	0.053525	0.9387	51	54.7135	32	1.7098	1	1.3025	1	55.0297	51	11	1	11:07:45	11:09:44	1	1	11:09:13	11:09:20	pelagic			0			0
21113	1	150	2015-12-18	62	0							11:10:20	11:11:41	80	82		13.8241	35	0.39497	13.8241	0			0	13.8241	47	0.29413	0	1.775	0		0	11	1	11:10:46	11:12:07	0	0						0			0
21113	1	151	2015-12-18	40	0							11:12:21	11:14:31	129	131		54.5059	36	1.4987	53.9526	13	0.014438	0.4051	34	54.1403	61	0.88755	1	1.3101	1	54.5059	34	11	1	11:12:48	11:14:57	1	0						0			0
21113	1	152	2015-12-18	42	0							11:15:13	11:17:36	142	144		54.3775	35	1.5327	53.6462	22	-0.00089545	0.6621	46	53.6265	63	0.85121	1	1.2958	1	54.3775	46	11	1	11:15:39	11:18:01	1	0						0			0
21113	1	153	2015-12-18	41	0							11:18:17	11:20:30	132	134		54.1798	34	1.5604	53.0534	26	0.028881	0.9288	37	53.8043	63	0.85404	1	1.3106	1	54.1798	37	11	1	11:18:44	11:20:56	1	1	11:19:27	11:19:32	benthic			1	11:19:32	11:19:53	1	?
21113	1	154	2015-12-18	34	0							11:21:04	11:23:23	138	140		54.3577	33	1.6206	53.4783	14	0.033171	0.9289	34	53.9427	73	0.73894	1	1.2464	1	54.3577	34	11	1	11:21:30	11:23:49	1	1	11:22:12	11:22:14	benthic			1	11:22:14	11:22:38	1	Opalfish
21113	1	155	2015-12-18	37	0							11:24:00	11:26:10	129	131		54.2194	32	1.6687	53.3992	17	0.034294	0.6621	44	53.9822	55	0.98149	1	1.2868	1	54.2194	44	11	1	11:24:26	11:26:36	1	1	11:25:30	11:25:28	benthic			1	11:25:28	11:25:42	0
21113	1	156	2015-12-18	42	0							11:26:52	11:29:05	132	134		53.7846	32	1.6524	52.8755	18	0.036233	0.8498	36	53.5277	66	0.81103	1	1.3182	1	53.7846	36	11	1	11:27:18	11:29:31	1	0						0			0
21113	1	157	2015-12-18	33	0							11:29:38	11:31:49	130	132		53.8142	34	1.5682	53.3202	21	0.015524	1.0672	47	53.6462	51	1.0519	1	1.2538	1	53.8142	47	11	1	11:30:05	11:32:15	1	1	11:31:02	11:31:06	benthic			1	11:31:06	11:31:25	1	?
21113	1	158	2015-12-18	43	0							11:32:32	11:34:49	136	138		54.0119	34	1.5761	53.587	20	-0.00198	0.5237	57	53.5474	47	1.1393	1	1.3162	1	54.0119	57	11	1	11:32:59	11:35:14	1	1	11:34:07	11:34:17	benthic			1	11:34:17	11:34:28	1	Opalfish
21113	1	159	2015-12-18	39	0							11:35:28	11:37:49	140	142		54.0119	32	1.6802	53.7648	26	-0.0019	0.415	51	53.7154	59	0.91043	1	1.2786	1	54.0119	51	11	1	11:35:54	11:38:15	1	0	11:36:39	11:36:44	benthic	stationary	1	1	11:37:11	11:37:17	1	Opalfish
21113	1	160	2015-12-18	20	0							11:38:09	11:39:13	63	65		8.3696	33	0.25362	8.3696	0			0	8.3696	32	0.26155	0	1.3175	0		0	11	1	11:38:35	11:39:39	0	0					0	0			0
21113	1	161	2015-12-18	30	0							11:39:43	11:42:02	138	140		55.5237	33	1.6565	54.664	20	0.03409	0.4051	66	55.3458	41	1.3499	1	1.2174	1	55.5237	66	11	1	11:40:09	11:42:28	1	0					0	0			0		ripples, sand flats
21113	1	162	2015-12-18	47	0							11:42:49	11:45:29	159	161		52.332	42	1.246	52.332	0			0	52.332	119	0.43977	0	1.2956	1	52.332	0	11	1	11:43:15	11:45:55	0	0					0	0			0
21113	1	163	2015-12-18	6	0							11:45:35	11:46:16	40	42		5.2668	17	0.30981	5.2668	0			0	5.2668	25	0.21067	0	1.15	0		0	11	1	11:46:02	11:46:42	0	0					0	0			0
21113	1	164	2015-12-18	60	0							11:47:16	11:48:28	71	73		10.3359	25	0.41344	10.3359	0			0	10.3359	48	0.21533	0	1.8451	0		0	11	1	11:47:43	11:48:54	0	0					0	0			0
21113	1	165	2015-12-18	23	0							11:48:51	11:50:10	78	80		7.2035	30	0.24012	7.2035	0			0	7.2035	50	0.14407	0	1.2949	0		0	11	1	11:49:17	11:50:36	0	0					0	0			0
21113	1	166	2015-12-18	12	0							11:50:22	11:51:33	70	72		7.9348	37	0.21445	7.9348	0			0	7.9348	35	0.22671	0	1.1714	0		0	11	1	11:50:48	11:51:57	0	0					0	0			0
21113	1	167	2015-12-18	14	0							11:51:47	11:53:13	85	87		12.8063	32	0.4002	12.8063	0			0	12.8063	55	0.23284	0	1.1647	0		0	11	1	11:52:13	11:53:39	0	0					0	0			0
21113	1	168	2015-12-18	36	0							11:53:49	11:56:15	145	147		59.5652	40	1.4704	58.8142	14	-0.076229	0.751	60	57.747	47	1.2287	1	1.2483	1	59.5652	60	11	1	11:54:15	11:56:41	1	0					0	0			0		gravel flats (hose mussels, brittle stars), then ripples
21113	1	169	2015-12-18	38	0							11:56:53	11:59:08	134	136		56.0277	35	1.5672	54.8518	16	-0.032119	1.1561	51	54.3379	50	1.0868	1	1.2836	1	56.0277	51	11	1	11:57:20	11:59:34	1	0					0	0			0		coarse gravel flats (hose mussels)
21113	1	170	2015-12-18	33	0							11:59:41	12:01:51	129	131		55.4446	35	1.5649	54.7727	16	0.013587	0.6324	47	54.9901	49	1.1222	1	1.2558	1	55.4446	47	11	1	12:00:07	12:02:17	1	0					1	0			0		coarse gravel flats (hose mussels), then ripples
21113	1	171	2015-12-18	33	0							12:02:24	12:04:46	141	143		56.2253	35	1.5802	55.3063	16	0.041994	0.5929	54	55.9782	54	1.0366	1	1.234	1	56.2253	54	12	1	12:02:51	12:05:12	1	0					0	0			0		ripples, then coarse gravel
21113	1	172	2015-12-18	38	0							12:05:24	12:07:42	137	139		56.3933	35	1.587	55.5435	24	0.027171	0.7114	59	56.1956	45	1.2488	1	1.2774	1	56.3933	59	12	1	12:05:50	12:08:08	1	1	12:06:37	12:06:45	benthic	chase	1	1			?		ripples (horse mussels), then sand flats
21113	1	173	2015-12-18	37	0							12:08:19	12:10:47	147	149		56.3735	36	1.5481	55.7312	31	0.0035059	0.5929	73	55.8399	40	1.396	1	1.2517	1	56.3735	73	12	1	12:08:45	12:11:13	1	1	12:10:24	12:10:28	benthic	stationary	1	1			1	Opalfish	coarse gravel (brittle stars, shell fragments); then ripples
21113	1	174	2015-12-18	42	0							12:11:29	12:14:02	152	154		56.4032	34	1.6362	55.6324	30	0.024047	0.4743	77	56.3538	43	1.3106	1	1.2763	1	56.4032	77	12	1	12:11:55	12:14:28	1	0	12:13:12	12:13:21	benthic		0	0			0		ripples
21113	1	175	2015-12-18	42	0							12:14:44	12:17:10	145	147		56.4921	35	1.5991	55.9684	28	0.0017643	0.6028	75	56.0178	37	1.514	1	1.2897	1	56.4921	75	12	1	12:15:11	12:17:36	1	1	12:16:06	12:16:12	benthic	stationary	2	2			2	Opalfish, Opalfish	ripples
21113	1	176	2015-12-18	39	0							12:17:49	12:20:20	150	152		56.413	33	1.6936	55.8893	34	-0.030806	0.8004	85	54.8419	34	1.613	1	1.26	1	56.413	85	12	1	12:18:15	12:20:47	1	1	12:19:18	12:19:25	benthic	stationary, chase	2	2			2	Opalfish, Blue Cod	ripples
21113	1	177	2015-12-18	80	0							12:21:40	12:23:36	115	117		55.8597	34	1.6235	55.1976	16	0.030881	0.6324	51	55.6917	32	1.7404	1	1.6957	1	55.8597	51	12	1	12:22:05	12:24:02	1	1	12:23:01	12:23:17	benthic	stationary	2	1	12:23:16	12:23:30	0		coarse gravel, horse mussels
21113	1	178	2015-12-18	46	0							12:24:22	12:26:23	120	122		55.8498	32	1.7234	55.1482	20	-0.00593	0.7016	54	55.0296	36	1.5286	1	1.3833	1	55.8498	54	12	1	12:24:48	12:26:49	1	1	12:25:46	12:25:51	benthic	chase	1	1	12:25:51	12:26:08	1	Blue cod	coarse gravel, horse mussels
21113	1	179	2015-12-18	49	0							12:27:12	12:29:23	130	132		55.6324	31	1.7783	55.1285	14	-0.0028286	0.5039	61	55.0889	40	1.3772	1	1.3769	1	55.6324	61	12	1	12:27:38	12:29:48	1	0					0	0					coarse gravel, horse mussels
21113	1	180	2015-12-18	40	0							12:30:03	12:32:18	134	136		55.1779	32	1.7095	54.7036	22	0.017514	0.3557	61	55.0889	43	1.2811	1	1.2985	1	55.1779	61	12	1	12:30:30	12:32:44	1	0											coarse gravel, horse mussels
21113	1	181	2015-12-18	47	0							12:33:05	12:35:26	140	142		55.8004	33	1.6349	53.9526	23	0.079909	1.5415	67	55.7905	42	1.3283	1	1.3357	1	55.8004	67	12	1	12:33:31	12:35:52	1	0											coarse gravel, horse mussels, then ripples (12:35:05 onwards)
21113	1	182	2015-12-18	43	0							12:36:09	12:38:34	144	146		55.8794	33	1.6712	55.1482	22	0.015723	0.7115	67	55.4941	46	1.2064	1	1.2986	1	55.8794	67	12	1	12:36:35	12:39:00	1	0											sandy, horse mussels & many brittle stars; then coarse gravel, horse mussels (12:37:24 onwards), arches back twards sand (12:37:36), gravel again, 12:38:03
21113	1	183	2015-12-18	103	0							12:40:17	12:42:40	142	144		56.1957	35	1.5596	54.585	20	0.065215	1.0968	68	55.8893	41	1.3632	1	1.7254	1	56.1957	68	12	1	12:40:44	12:43:06	1	1	12:41:31	12:41:48	benthic	stationary	1	0					coarse gravel, horse mussels
21113	1	184	2015-12-18	51	0							12:43:31	12:45:57	145	147		56.1364	37	1.44	53.2806	14	0.17575	1.9862	56	55.7411	54	1.0322	1	1.3517	1	56.1364	56	12	1	12:43:58	12:46:23	1	0	12:45:21	12:45:31	benthic	stationary	0	1			1	opalfish	coarse gravel (no mussels) then ripples, pupil fully dilated, well visible @ 12:45:33 (it seems rather dark)
21113	1	185	2015-12-18	39	0							12:46:36	12:49:01	144	146		57.0356	35	1.6053	56.1858	27	0.031474	0.6225	65	57.0356	46	1.2399	1	1.2708	1	57.0356	65	12	1	12:47:03	12:49:27	1	0			benthic	stationary	0	1	12:47:55	12:48:18	1	opalfish	ripples
21113	1	186	2015-12-18	70	0							12:50:11	12:52:43	151	153		57.1937	36	1.5808	56.9071	36	-0.000275	0.7213	80	56.8972	37	1.5378	1	1.4636	1	57.1937	80	12	1	12:50:37	12:53:09	1	0			benthic	stationary	0	1	12:52:29	12:52:31	1	opalfish	ripples
21113	1	187	2015-12-18	51	0							12:53:34	12:55:58	143	145		57.0059	35	1.6124	56.4328	26	-0.00038077	0.5731	69	56.4229	41	1.3762	1	1.3566	1	57.0059	69	12	1	12:54:01	12:56:24	1	0			benthic	stationary	1	1	12:55:03	12:55:20	0		ripples
21113	1	188	2015-12-18	76	0							12:57:14	12:58:25	70	72		4.7036	21	0.22398	4.7036	0			0	4.7036	51	0.092227	0	2.0857	0		0	12	1	12:57:40	12:58:51	0
21113	1	189	2015-12-18	16	0							12:58:41	12:59:51	69	71		8.0632	24	0.33597	8.0632	0			0	8.0632	47	0.17156	0	1.2319	0		0	12	1	12:59:07	13:00:17	0
21113	1	190	2015-12-18	36	0							13:00:27	13:02:54	146	148		55.8893	37	1.4555	53.8538	26	0.070308	2.0355	63	55.6818	48	1.16	1	1.2466	1	55.8893	63	13	1
21113	1	191	2015-12-18	35	0							13:03:29	13:05:59	149	151		56.67	37	1.5164	56.1067	30	0.0032933	1.5218	82	56.2055	32	1.7564	1	1.2349	1	56.67	82	13	0
21113	1	192	2015-12-18	44	0							13:06:43	13:09:02	138	140		56.8182	34	1.6633	56.5514	37	0.0010676	0.3657	68	56.5909	38	1.4892	1	1.3188	1	56.8182	68	13	0
21113	1	193	2015-12-18	43	0							13:09:45	13:12:07	141	143		57.2925	33	1.7248	56.917	28	0.003175	0.9684	73	57.0059	37	1.5407	1	1.305	1	57.2925	73	13	0
21113	1	194	2015-12-18	38	0							13:12:45	13:15:01	135	137		57.5692	32	1.7787	56.917	20	-0.018775	0.9981	67	56.5415	38	1.4879	1	1.2815	1	57.5692	67	13	0
21113	1	195	2015-12-18	37	0							13:15:38	13:17:58	139	141		57.7174	33	1.7209	56.7885	10	0.04842	0.9289	22	57.2727	86	0.66596	1	1.2662	1	57.7174	22	13	0
21113	1	196	2015-12-18	8	0							13:18:06	13:18:53	46	48		4.2095	10	0.42095	4.2095	0			0	4.2095	38	0.11078	0	1.1739	0		0	13	0
21113	1	197	2015-12-18	17	0							13:19:10	13:20:26	75	77		9.9407	37	0.26867	9.9407	0			0	9.9407	40	0.24852	0	1.2267	0		0	13	0
21113	1	198	2015-12-18	40	0							13:21:06	13:22:54	107	109		57.8656	36	1.57	56.5217	14	0.023293	1.3439	32	56.8478	41	1.3865	1	1.3738	1	57.8656	32	13	0
21113	1	199	2015-12-18	45	0							13:23:39	13:25:41	121	123		55.8696	34	1.6136	54.8617	18	-0.049411	2.7273	57	53.9723	32	1.6866	1	1.3719	1	55.8696	57	13	0
21113	1	200	2015-12-18	41	0							13:26:22	13:28:25	122	124		52.915	31	1.6744	51.9071	13	-0.0038	1.0079	56	51.8577	37	1.4016	1	1.3361	1	52.915	56	13	0
21113	1	201	2015-12-18	41	0							13:29:06	13:31:23	136	138		52.2332	31	1.6473	51.0672	25	0.037548	0.7312	78	52.0059	29	1.7933	1	1.3015	1	52.2332	78	13	0
21113	1	202	2015-12-18	45	0							13:32:08	13:34:16	127	129		52.8953	35	1.4763	51.67	20	0.05237	1.0475	57	52.7174	37	1.4248	1	1.3543	1	52.8953	57	13	0
21113	1	203	2015-12-18	26	0							13:34:42	13:35:45	62	64		7.085	23	0.30804	7.085	0			0	7.085	41	0.1728	0	1.4194	0		0	13	0
21113	1	204	2015-12-18	32	0							13:36:17	13:38:11	113	115		51.7194	30	1.664	49.9209	16	0.098819	1.5118	37	51.502	48	1.073	1	1.2832	1	51.7194	37	13	0
21113	1	205	2015-12-18	34	0							13:38:45	13:41:00	134	136		52.8656	32	1.5943	51.0178	31	0.050681	0.583	69	52.5889	35	1.5025	1	1.2537	1	52.8656	69	13	0
21113	1	206	2015-12-18	48	0							13:41:48	13:43:57	128	130		53.8142	32	1.6419	52.5395	26	0.030785	0.4743	54	53.3399	44	1.2123	1	1.375	1	53.8142	54	13	0
21113	1	207	2015-12-18	40	0							13:44:37	13:46:49	131	133		54.4071	32	1.6783	53.7055	24	0.0057667	0.4743	54	53.8439	47	1.1456	1	1.3053	1	54.4071	54	13	0
21113	1	208	2015-12-18	40	0							13:47:29	13:49:37	127	129		54.8221	34	1.5932	54.17	14	0.028229	0.5928	40	54.5652	55	0.99209	1	1.315	1	54.8221	40	13	0
21113	1	209	2015-12-18	23	0							13:50:00	13:51:11	70	72		11.8478	38	0.31178	11.8478	0			0	11.8478	34	0.34846	0	1.3286	0		0	13	0
21113	1	210	2015-12-18	20	0							13:51:31	13:52:57	85	87		16.7095	41	0.40755	16.7095	0			0	16.7095	46	0.36325	0	1.2353	0		0	13	0
21113	1	211	2015-12-18	28	0							13:53:25	13:55:40	134	136		55.8696	35	1.5697	54.9407	23	0.027926	0.5731	60	55.583	41	1.3557	1	1.209	1	55.8696	60	13	0
21113	1	212	2015-12-18	40	0							13:56:20	13:58:16	115	117		56.0573	33	1.6523	54.5257	11	0.13385	1.5316	23	55.998	61	0.918	1	1.3478	1	56.0573	23	13	0
21113	1	213	2015-12-18	26	0							13:58:42	14:00:50	127	129		55.8103	33	1.6385	54.0711	14	0.09035	1.7392	52	55.336	44	1.2576	1	1.2047	1	55.8103	52	13	0
21113	1	214	2015-12-18	33	0							14:01:23	14:03:37	133	135		55.3063	34	1.6165	54.9605	22	-0.00045	0.6423	68	54.9506	33	1.6652	1	1.2481	1	55.3063	68	14	0
21113	1	215	2015-12-18	35	0							14:04:12	14:06:17	124	126		55.4743	33	1.6556	54.6344	18	-0.065878	0.919	60	53.4486	33	1.6197	1	1.2823	1	55.4743	60	14	0
21113	1	216	2015-12-18	39	0							14:06:56	14:09:10	133	135		55.9289	32	1.7147	54.8715	15	0.059953	0.6621	64	55.7708	39	1.43	1	1.2932	1	55.9289	64	14	0
21113	1	217	2015-12-18	15	0							14:09:25	14:10:10	44	46		9.1996	19	0.48419	9.1996	0			0	9.1996	27	0.34073	0	1.3409	0		0	14	0
21113	1	218	2015-12-18	26	0							14:10:36	14:12:47	130	132		56.749	36	1.5305	55.0988	15	0.091567	1.3538	55	56.4723	41	1.3774	1	1.2	1	56.749	55	14	0
21113	1	219	2015-12-18	33	0							14:13:20	14:15:06	105	107		26.7885	60	0.44648	26.7885	0			0	26.7885	47	0.56997	0	1.3143	0		0	14	0
21113	1	220	2015-12-18	30	0							14:15:36	14:17:54	137	139		56.6502	36	1.5495	55.7806	25	0.007116	0.8202	63	55.9585	40	1.399	1	1.219	1	56.6502	63	14	0
21113	1	221	2015-12-18	34	0							14:18:28	14:20:35	126	128		55.2174	34	1.5944	54.2095	22	-0.0080864	0.9684	59	54.0316	35	1.5438	1	1.2698	1	55.2174	59	14	0
21113	1	222	2015-12-18	36	0							14:21:11	14:23:31	139	141		50.83	32	1.5613	49.9605	25	-0.17075	0.8695	80	45.6917	29	1.5756	1	1.259	1	50.83	80	14	0
21113	1	223	2015-12-18	32	0							14:24:03	14:26:09	125	127		46.0277	27	1.6465	44.4565	24	0.055996	0.3953	66	45.8004	34	1.3471	1	1.256	1	46.0277	66	14	0
21113	1	224	2015-12-18	31	0							14:26:40	14:28:44	123	125		46.9466	30	1.556	46.6798	17	-0.11509	0.9387	67	44.7233	28	1.5973	1	1.252	1	46.9466	67	14	0
21113	1	225	2015-12-18	32	0							14:29:16	14:31:18	121	123		44.9407	27	1.6473	44.4763	21	-0.031057	0.5237	61	43.8241	35	1.2521	1	1.2645	1	44.9407	61	14	0
21113	1	226	2015-12-18	36	0							14:31:54	14:34:00	125	127		44.1304	27	1.5979	43.1423	20	0.01927	0.9881	62	43.5277	38	1.1455	1	1.288	1	44.1304	62	14	0
21113	1	227	2015-12-18	27	0							14:34:27	14:36:31	123	125		44.5949	28	1.5355	42.9941	23	0.054991	0.7411	64	44.2589	33	1.3412	1	1.2195	1	44.5949	64	14	0
21113	1	228	2015-12-18	29	0							14:37:00	14:39:02	121	123		45.6621	28	1.6276	45.5731	20	-0.11759	0.4545	64	43.2213	31	1.3942	1	1.2397	1	45.6621	64	14	0
21113	1	229	2015-12-18	31	0							14:39:33	14:41:37	123	125		45.0198	29	1.5343	44.496	16	-0.062375	0.5238	60	43.498	36	1.2083	1	1.252	1	45.0198	60	14	0
21113	1	230	2015-12-18	29	0							14:42:06	14:44:12	125	127		46.996	29	1.5446	44.7925	11	0.16888	1.3043	53	46.6502	45	1.0367	1	1.232	1	46.996	53	14	0
21113	1	231	2015-12-18	31	0							14:44:43	14:46:56	132	134		51.5613	33	1.54	50.8202	25	0.026876	0.6126	55	51.4921	46	1.1194	1	1.2348	1	51.5613	55	14	0
21113	1	232	2015-12-18	15	0							14:47:11	14:48:24	72	74		11.7589	34	0.34585	11.7589	0			0	11.7589	40	0.29397	0	1.2083	0		0	14	0
21113	1	233	2015-12-18	34	0							14:48:58	14:51:16	137	139		52.2628	35	1.4593	51.0771	14	0.019057	1.334	62	51.3439	42	1.2225	1	1.2482	1	52.2628	62	14	0
21113	1	234	2015-12-18	29	0							14:51:45	14:53:21	95	97		15.5336	47	0.3305	15.5336	0			0	15.5336	50	0.31067	0	1.3053	0		0	14	0
21113	1	235	2015-12-18	25	0							14:53:46	14:56:05	138	140		51.4526	41	1.2516	51.3142	28	-0.0070571	0.5139	65	51.1166	34	1.5034	1	1.1812	1	51.4526	65	14	0
21113	1	236	2015-12-18	34	0							14:56:39	14:58:46	126	128		52.3518	35	1.4393	50.3755	24	0.077817	1.1858	63	52.2431	30	1.7414	1	1.2698	1	52.3518	63	14	0
21113	1	237	2015-12-18	40	0							14:59:26	15:01:29	122	124		52.668	32	1.5955	51.0573	13	0.10718	1.5514	52	52.4506	40	1.3113	1	1.3279	1	52.668	52	14	0
21113	1	238	2015-12-18	34	0							15:02:03	15:04:09	125	127		52.2332	33	1.5544	51.2945	24	0.030879	0.9387	59	52.0356	35	1.4867	1	1.272	1	52.2332	59	15	0
21113	1	239	2015-12-18	33	0							15:04:42	15:06:53	130	132		52.1146	32	1.5946	51.0277	15	0.0013133	1.0869	66	51.0474	34	1.5014	1	1.2538	1	52.1146	66	15	0
21113	1	240	2015-12-18	19	0							15:07:12	15:08:11	58	60		14.9605	32	0.46752	14.9605	0			0	14.9605	28	0.5343	0	1.3276	0		0	15	0
21113	1	241	2015-12-18	27	0							15:08:38	15:10:45	126	128		50.0791	33	1.4849	49.002	12	-0.025525	1.0771	53	48.6957	42	1.1594	1	1.2143	1	50.0791	53	15	0
21113	1	242	2015-12-18	32	0							15:11:17	15:13:18	120	122		47.9743	32	1.4658	46.9071	15	-0.017127	1.0672	54	46.6502	36	1.2958	1	1.2667	1	47.9743	54	15	0
21113	1	243	2015-12-18	15	0							15:13:33	15:14:32	58	60		12.9051	23	0.56109	12.9051	0			0	12.9051	37	0.34879	0	1.2586	0		0	15	0
21113	1	244	2015-12-18	24	0							15:14:56	15:17:02	125	127		52.8557	34	1.4648	49.8024	14	0.19551	2.2826	54	52.5395	39	1.3472	1	1.192	1	52.8557	54	15	0
21113	1	245	2015-12-18	31	0							15:17:33	15:19:42	128	130		53.4289	34	1.5389	52.3221	16	-0.071019	0.8696	60	51.1858	36	1.4218	1	1.2422	1	53.4289	60	15	0
21113	1	246	2015-12-18	24	0							15:20:06	15:21:27	80	82		20.415	44	0.46398	20.415	0			0	20.415	38	0.53724	0	1.3	0		0	15	0
21113	1	247	2015-12-18	23	0							15:21:50	15:24:03	132	134		49.9407	33	1.487	49.0711	16	-0.0055563	1.1265	67	48.9822	34	1.4407	1	1.1742	1	49.9407	67	15	0
21113	1	248	2015-12-18	32	0							15:24:35	15:26:42	126	128		48.2806	30	1.5655	46.9664	14	0.032464	1.3142	49	47.4209	49	0.96777	1	1.254	1	48.2806	49	15	0
21113	1	249	2015-12-18	12	0							15:26:54	15:27:47	52	54		13.666	27	0.50615	13.666	0			0	13.666	27	0.50615	0	1.2308	0		0	15	0
21113	1	250	2015-12-18	24	0							15:28:11	15:30:13	121	123		46.2549	28	1.5627	43.7549	20	0.03508	1.0969	63	44.4565	32	1.3893	1	1.1983	1	46.2549	63	15	0
21113	1	251	2015-12-18	27	0							15:30:40	15:32:48	127	129		44.081	29	1.5023	43.5672	36	-0.0019222	2.2332	75	43.498	25	1.7399	1	1.2126	1	44.081	75	15	0
21113	1	252	2015-12-18	42	0							15:33:30	15:35:38	127	129		42.7964	31	1.356	42.0356	22	-0.044918	1.2154	67	41.0474	31	1.3241	1	1.3307	1	42.7964	67	15	0
21113	1	253	2015-12-18	25	0							15:36:03	15:37:57	113	115		39.002	24	1.5934	38.2411	21	-0.072462	1.0573	61	36.7194	30	1.224	1	1.2212	1	39.002	61	15	0
21113	1	254	2015-12-18	24	0							15:38:21	15:40:05	103	105		35.3755	24	1.4649	35.1581	18	-0.14053	2.1343	57	32.6285	24	1.3595	1	1.233	1	35.3755	57	15	0
21113	1	255	2015-12-18	21	0							15:40:26	15:41:54	87	89		31.581	23	1.3516	31.087	14	-0.655	2.8557	50	21.917	16	1.3698	1	1.2414	1	31.581	50	15	0
21113	1	256	2015-12-18	13	0							15:42:07	15:42:54	46	48		17.3024	10	1.7302	17.3024	0			0	17.3024	38	0.45533	0	1.2826	0		0	15	0
21113	1	257	2015-12-18	5	0							15:42:59	15:43:50	50	52		18.5573	26	0.71374	18.5573	0			0	18.5573	26	0.71374	0	1.1	0		0	15	0
21113	1	258	2015-12-18	14	0							15:44:04	15:45:25	80	82		27.1245	31	0.87498	27.1245	0			0	27.1245	51	0.53185	0	1.175	1	27.1245	0	15	0
21113	1	259	2015-12-18	16	0							15:45:41	15:46:49	67	69		16.5119	45	0.36693	16.5119	0			0	16.5119	24	0.688	0	1.2388	0		0	15	0
21113	1	260	2015-12-18	7	0							15:46:56	15:47:20	23	25		3.8142	11	0.32249	3.5474	5	-0.12252	1.166	9	2.9348	5	0.58696	0	1.3043	0		0	15	0
21113	1	261	2015-12-18	5	0							15:47:25	15:47:58	32	34		7.085	6	1.1808	7.085	11	-0.081745	1.9565	23	6.1858	5	1.2372	0	1.1563	0		0	15	0
21113	1	262	2015-12-18	10	0							15:48:08	15:49:20	71	73		22.8063	28	0.81451	22.8063	0			0	22.8063	45	0.50681	0	1.1408	1	22.8063	0	15	0
21113	1	263	2015-12-18	15	0							15:49:35	15:50:39	63	65		22.4012	15	1.4539	21.8083	8	0.0247	2.1047	24	22.0059	26	0.84638	1	1.2381	1	22.4012	24	15	0
21113	1	264	2015-12-18	19	0							15:50:58	15:51:51	52	54		21.5909	19	1.113	21.1462	6	-0.11198	0.2865	13	20.4743	22	0.93065	1	1.3654	1	21.5909	13	15	0
21113	1	265	2015-12-18	11	0							15:52:02	15:53:33	90	92		20.8992	16	1.2809	20.4941	22	-0.013477	4.3281	63	20.1976	13	1.5537	1	1.1222	1	20.8992	63	15	0
21113	1	266	2015-12-18	25	0							15:53:58	15:54:58	59	61		19.7628	24	0.78887	18.9328	8	-0.0037	2.4308	20	18.9032	17	1.112	1	1.4237	1	19.7628	20	15	0
21113	1	267	2015-12-18	13	0							15:55:11	15:56:50	98	100		19.1897	13	1.4541	18.9032	32	-0.0030906	6.9071	72	18.8043	15	1.2536	1	1.1327	1	19.1897	72	15	0
21113	1	268	2015-12-18	18	0							15:57:08	15:58:16	67	69		17.6976	12	1.3076	15.6917	12	0.14575	10.9486	45	17.4407	12	1.4534	0	1.2687	1	17.6976	45	15	0
21113	1	269	2015-12-18	12	0							15:58:28	15:59:20	51	53		17.0158	19	0.89557	17.0158	0			0	17.0158	34	0.50046	0	1.2353	1	17.0158	0	15	0
21113	1	270	2015-12-18	8	0							15:59:28	15:59:41	12	14		4.2391	7	0.60559	4.2391	0			0	4.2391	7	0.60559	0	1.6667	0		0	15	0
21113	1	271	2015-12-18	2	0							15:59:43	15:59:48	4	6		1.2253	4	0.30633	1.2253	0			0	1.2253	2	0.61265	0	1.5	0		0	15	0
21113	1	272	2015-12-18	9	0							15:59:57	16:00:56	58	60		15.0889	12	1.1561	13.8735	11	0.088036	4.7826	34	14.8419	14	1.0601	1	1.1552	1	15.0889	34	15	0
21113	1	273	2015-12-18	11	0							16:01:07	16:01:56	48	50		13.587	15	0.87615	13.1423	6	-0.33103	1.166	24	11.1561	11	1.0142	1	1.2292	1	13.587	24	16	0
21113	1	274	2015-12-18	8	0							16:02:04	16:02:51	46	48		11.1462	10	1.0751	10.751	6	0.0049333	0.3952	17	10.7806	21	0.51336	1	1.1739	1	11.1462	17	16	0
21113	1	275	2015-12-18	9	0							16:03:00	16:03:40	39	41		9.2787	9	0.9563	8.6067	2	-0.41005	0.672	14	7.7866	18	0.43259	1	1.2308	0		0	16	0
21113	1	276	2015-12-18	7	0							16:03:47	16:04:21	33	35		7.7866	13	0.58225	7.5692	8	-0.028413	0.2174	11	7.3419	11	0.66745	1	1.2121	0		0	16	0
21113	1	277	2015-12-18	5	0							16:04:26	16:04:55	28	30		5.83	7	0.79051	5.5336	4	-0.056825	0.2964	10	5.3063	13	0.40818	1	1.1786	0		0	16	0
21113	1	278	2015-12-18	8	0							16:05:03	16:05:35	31	33		4.7628	8	0.56941	4.5553	8	-0.17539	0.1581	18	3.1522	7	0.45031	1	1.2581	0		0	16	0
21113	1	279	2015-12-18	26	0							16:06:01	16:06:30	28	30		5.0889	7	0.57594	4.0316	6	0.15482	0.6324	14	4.9605	9	0.55117	0	1.9286	0		0	16	0
21113	1	280	2015-12-18	11	0							16:06:41	16:07:08	26	28		5.5731	6	0.75922	4.5553	2	0.36565	1.0178	10	5.2866	12	0.44055	0	1.4231	0		0	16	0
21113	1	281	2015-12-18	20	0							16:07:28	16:08:03	34	36		2.7767	5	0.52174	2.6087	5	-0.15416	0.5928	21	1.8379	10	0.18379	0	1.5882	0		0	16	0
21113	1	282	2015-12-18	57	0							16:09:00	16:09:30	29	31		2.4111	5	0.42094	2.1047	5	0.04348	0.4645	20	2.3221	6	0.38702	0	2.9655	0		0	16	0
21113	1	283	2015-12-18	4	0							16:09:34	16:09:39	4	6		0.99802	4	0.24951	0.99802	0			0	0.99802	2	0.49901	0	2	0		0	16	0
21113	1	284	2015-12-18	0	0							16:09:39	16:09:59	19	21		1.6897	17	0.099394	1.6897	0			0	1.6897	4	0.42242	0	1	0		0	16	0
21113	1	285	2015-12-18	0	0							16:09:59	16:10:11	11	13		2.085	4	0.42985	1.7194	1	0.3656	0.3656	5	2.085	4	0.52125	0	1	0		0	16	0
21113	1	286	2015-12-18	3	0							16:10:14	16:10:26	11	13		1.5316	6	0.25527	1.5316	0			0	1.5316	7	0.2188	0	1.2727	0		0	16	0
[truncated: 3 more columns]

## Sheet: pelagic dives
birdID	TripNumber	EventNo	Date	SurfaceTime	NoFixes	FirstLat	FirstLon	LastLat	LastLon	SurfaceDist	SurfaceVelo	EvtOnset	EvtEnd	DiveTime		DiveDistance	EvtMaxDepth	DescDur	DescVelo	StartBot	NoWiggles	MeanWigAmp	MaxWigAmp	BottomTime	BottomEnd	AscDur	AscVelo	Benthic dive	diving efficiency	BottomDive	foraging effort
21113	1	1	2015-12-18									05:30:58	05:31:19	20	23		1.2253	7	0.17505	1.2253	0			0	1.2253	15	0.081689	0		0
21113	1	2	2015-12-18	0	0							05:31:19	05:31:49	29	31		0.89921	21	0.042819	0.89921	0			0	0.89921	10	0.089921	0	1	0
21113	1	3	2015-12-18	0	0							05:31:49	05:32:19	29	31		0.8004	14	0.057171	0.8004	0			0	0.8004	17	0.047082	0	1	0
21113	1	4	2015-12-18	0	0							05:32:19	05:32:42	22	24		0.57313	6	0.095521	0.57313	0			0	0.57313	18	0.03184	0	1	0
21113	1	5	2015-12-18	5	0							05:32:47	05:33:03	15	17		1.3636	6	0.22727	1.3636	0			0	1.3636	11	0.12397	0	1.3333	0
21113	1	6	2015-12-18	0	0							05:33:03	05:33:21	17	19		2.2233	8	0.27792	2.2233	0			0	2.2233	11	0.20212	0	1	0
21113	1	7	2015-12-18	6	0							05:33:27	05:33:59	31	33		3.4091	13	0.26224	3.4091	0			0	3.4091	20	0.17046	0	1.1935	0
21113	1	8	2015-12-18	12	0							05:34:11	05:34:59	47	49		6.8774	13	0.45455	5.9091	6	0.1548	2.6877	20	6.8379	16	0.42737	1	1.2553	0
21113	1	9	2015-12-18	14	0							05:35:13	05:36:16	62	64		8.4288	11	0.65577	7.2134	15	0.081027	1.6601	40	8.4288	13	0.64837	1	1.2258	0
21113	1	10	2015-12-18	9	0							05:36:25	05:37:19	53	55		9.5652	12	0.71723	8.6067	11	0.087136	1.2846	29	9.5652	14	0.68323	1	1.1698	0
21113	1	17	2015-12-18	9	0							05:47:25	05:47:54	28	30		7.4407	15	0.49605	7.4407	0			0	7.4407	15	0.49605	0	1.3214	0
21113	1	18	2015-12-18	11	0							05:48:05	05:49:10	64	66		9.6443	33	0.28566	9.4269	6	-0.11693	3.9723	19	8.7253	14	0.62324	0	1.1719	0
21113	1	19	2015-12-18	15	0							05:49:25	05:50:18	52	54		7.7668	8	0.71393	5.7114	11	0.15272	2.9842	30	7.3913	16	0.46196	0	1.2885	0
21113	1	20	2015-12-18	14	0							05:50:32	05:50:54	21	23		4.8517	5	0.97035	4.8517	3	-0.3656	0.5238	5	3.7549	13	0.28884	0	1.6667	0
21113	1	21	2015-12-18	17	0							05:51:11	05:51:41	29	31		3.1423	6	0.47431	2.8458	5	0.0593	2.6779	17	3.1423	8	0.39279	0	1.5862	0
21113	1	22	2015-12-18	1	0							05:51:42	05:52:51	68	70		7.0652	28	0.25233	7.0652	0			0	7.0652	42	0.16822	0	1.0147	0
21113	1	23	2015-12-18	10	0							05:53:01	05:53:59	57	59		4.4565	13	0.34281	4.4565	14	-0.11223	2.5098	38	2.8853	8	0.36067	0	1.1754	0
21113	1	24	2015-12-18	6	0							05:54:05	05:54:40	34	36		7.747	22	0.35214	7.747	0			0	7.747	14	0.55336	0	1.1765	0
21113	1	25	2015-12-18	14	0							05:54:54	05:56:04	69	71		9.0711	23	0.3944	9.0711	0			0	9.0711	48	0.18898	0	1.2029	0
21113	1	26	2015-12-18	11	0							05:56:15	05:57:13	57	59		7.0257	13	0.4059	5.2766	3	0.35903	1.7885	23	6.3537	23	0.27625	0	1.193	0
21113	1	27	2015-12-18	24	0							05:57:37	05:57:52	14	16		1.8379	7	0.26256	1.8379	0			0	1.8379	9	0.20422	0	2.7143	0
21113	1	28	2015-12-18	12	0							05:58:04	05:59:07	62	64		10.1778	28	0.36349	10.1778	0			0	10.1778	36	0.28272	0	1.1935	0
21113	1	29	2015-12-18	8	0							05:59:15	05:59:51	35	37		4.3774	21	0.20845	4.3774	0			0	4.3774	16	0.27359	0	1.2286	0
21113	1	30	2015-12-18	6	0							05:59:57	06:00:51	53	55		8.1719	11	0.56953	6.2648	4	0.45208	2.8755	21	8.0731	23	0.35101	0	1.1132	0
21113	1	31	2015-12-18	14	0							06:01:05	06:01:58	52	54		10.7114	30	0.35705	10.7114	0			0	10.7114	24	0.44631	0	1.2692	0
21113	1	32	2015-12-18	31	0							06:02:29	06:02:56	26	28		3.1719	9	0.35244	3.1719	0			0	3.1719	19	0.16694	0	2.1923	0
21113	1	33	2015-12-18	12	0							06:03:08	06:03:56	47	49		10.6027	30	0.35342	10.6027	0			0	10.6027	19	0.55804	0	1.2553	0
21113	1	34	2015-12-18	8	0							06:04:04	06:05:15	70	72		11.9763	37	0.32368	11.9763	0			0	11.9763	35	0.34218	0	1.1143	0
21113	1	35	2015-12-18	17	0							06:05:32	06:06:59	86	88		12.3814	24	0.51589	12.3814	0			0	12.3814	64	0.19346	0	1.1977	0
21113	1	36	2015-12-18	14	0							06:07:13	06:08:24	70	72		9.3083	34	0.27377	9.3083	0			0	9.3083	38	0.24496	0	1.2	0
21113	1	37	2015-12-18	15	0							06:08:39	06:09:58	78	80		12.332	33	0.3737	12.332	0			0	12.332	47	0.26238	0	1.1923	0
21113	1	38	2015-12-18	15	0							06:10:13	06:11:42	88	90		16.4031	40	0.41008	16.4031	0			0	16.4031	50	0.32806	0	1.1705	0
21113	1	39	2015-12-18	24	0							06:12:06	06:13:50	103	105		31.7095	41	0.7734	31.7095	0			0	31.7095	64	0.49546	0	1.233	0
21113	1	41	2015-12-18	53	0							06:17:27	06:19:11	103	105		18.913	46	0.41115	18.913	0			0	18.913	59	0.32056	0	1.5146	0
21113	1	42	2015-12-18	982	0							06:35:33	06:36:13	39	41		4.4466	20	0.22233	4.4466	0			0	4.4466	21	0.21174	0	26.1795	0
21113	1	43	2015-12-18	50	0							06:37:03	06:38:28	84	86		15.3854	30	0.51285	15.3854	0			0	15.3854	56	0.27474	0	1.5952	0
21113	1	49	2015-12-18	31	0							06:54:38	06:55:44	65	67		6.7984	29	0.23443	6.7984	0			0	6.7984	38	0.17891	0	1.4769	0
21113	1	53	2015-12-18	2	0							07:04:54	07:05:02	7	9		0.63241	7	0.090344	0.63241	0			0	0.63241	2	0.31621	0	1.2857	0
21113	1	54	2015-12-18	0	0							07:05:02	07:05:06	3	5		0.5336	3	0.17787	0.5336	0			0	0.5336	2	0.2668	0	1	0
21113	1	55	2015-12-18	0	0							07:05:06	07:05:12	5	7		0.62253	4	0.15563	0.62253	0			0	0.62253	3	0.20751	0	1	0
21113	1	56	2015-12-18	0	0							07:05:12	07:05:16	3	5		0.54348	2	0.27174	0.54348	0			0	0.54348	3	0.18116	0	1	0
21113	1	57	2015-12-18	169	0							07:08:05	07:08:50	44	46		8.8735	16	0.55459	8.8735	0			0	8.8735	30	0.29578	0	4.8409	0
21113	1	58	2015-12-18	27	0							07:09:17	07:10:20	62	64		11.6897	28	0.41749	11.6897	0			0	11.6897	36	0.32471	0	1.4355	0
21113	1	60	2015-12-18	6	0							07:12:29	07:12:35	5	7		0.64229	3	0.2141	0.64229	0			0	0.64229	4	0.16057	0	2.2	0
21113	1	61	2015-12-18	0	0							07:12:35	07:12:40	4	6		0.96838	3	0.32279	0.96838	0			0	0.96838	3	0.32279	0	1	0
21113	1	62	2015-12-18	120	0							07:14:40	07:15:30	49	51		7.4901	20	0.3745	7.4901	0			0	7.4901	31	0.24162	0	3.449	0
21113	1	63	2015-12-18	29	0							07:15:59	07:16:47	47	49		4.8814	22	0.22188	4.8814	0			0	4.8814	27	0.18079	0	1.617	0
21113	1	64	2015-12-18	44	0							07:17:31	07:18:18	46	48		4.6443	23	0.20193	4.6443	0			0	4.6443	25	0.18577	0	1.9565	0
21113	1	65	2015-12-18	35	0							07:18:53	07:19:54	60	62		7.7174	25	0.3087	7.7174	0			0	7.7174	37	0.20858	0	1.5833	0
21113	1	66	2015-12-18	18	0							07:20:12	07:21:12	59	61		8.6462	34	0.2543	8.6462	0			0	8.6462	27	0.32023	0	1.3051	0
21113	1	67	2015-12-18	11	0							07:21:23	07:22:31	67	69		9.9901	27	0.37	9.9901	0			0	9.9901	42	0.23786	0	1.1642	0
21113	1	69	2015-12-18	77	0							07:26:14	07:27:03	48	50		6.7787	24	0.28245	6.7787	0			0	6.7787	26	0.26072	0	2.6042	0
21113	1	70	2015-12-18	23	0							07:27:26	07:28:24	57	59		6.413	24	0.26721	6.413	0			0	6.413	35	0.18323	0	1.4035	0
21113	1	71	2015-12-18	10	0							07:28:34	07:29:45	70	72		7.8261	38	0.20595	7.8261	0			0	7.8261	34	0.23018	0	1.1429	0
21113	1	72	2015-12-18	10	0							07:29:55	07:31:13	77	79		10.7115	34	0.31504	10.7115	0			0	10.7115	45	0.23803	0	1.1299	0
21113	1	73	2015-12-18	10	0							07:31:23	07:32:38	74	76		10.2866	38	0.2707	10.2866	0			0	10.2866	38	0.2707	0	1.1351	0
21113	1	74	2015-12-18	10	0							07:32:48	07:34:16	87	89		12.2134	49	0.24925	12.2134	0			0	12.2134	40	0.30534	0	1.1149	0
21113	1	75	2015-12-18	22	0							07:34:38	07:36:10	91	93		14.2391	46	0.30955	14.2391	0			0	14.2391	47	0.30296	0	1.2418	0
21113	1	76	2015-12-18	16	0							07:36:26	07:38:02	95	97		14.9407	56	0.2668	14.9407	0			0	14.9407	41	0.36441	0	1.1684	0
21113	1	78	2015-12-18	25	0							07:41:21	07:42:41	79	81		11.9269	30	0.39756	11.9269	0			0	11.9269	51	0.23386	0	1.3165	0
21113	1	80	2015-12-18	0	0							07:45:27	07:45:33	5	7		0.73123	4	0.18281	0.73123	0			0	0.73123	3	0.24374	0	1	0
21113	1	81	2015-12-18	17	0							07:45:50	07:46:18	27	29		4.6047	9	0.51164	4.6047	0			0	4.6047	20	0.23024	0	1.6296	0
21113	1	82	2015-12-18	20	0							07:46:38	07:47:17	38	40		6.4624	17	0.38014	6.4624	0			0	6.4624	23	0.28097	0	1.5263	0
21113	1	83	2015-12-18	14	0							07:47:31	07:47:55	23	25		2.7964	6	0.46607	2.7964	0			0	2.7964	19	0.14718	0	1.6087	0
21113	1	84	2015-12-18	14	0							07:48:09	07:48:52	42	44		7.6778	19	0.4041	7.6778	0			0	7.6778	25	0.30711	0	1.3333	0
21113	1	85	2015-12-18	19	0							07:49:11	07:49:56	44	46		5.9782	14	0.42702	5.9782	0			0	5.9782	32	0.18682	0	1.4318	0
21113	1	86	2015-12-18	0	0							07:49:56	07:50:09	12	14		1.2352	5	0.24704	1.2352	0			0	1.2352	9	0.13724	0	1	0
21113	1	87	2015-12-18	15	0							07:50:24	07:51:35	70	72		12.3221	28	0.44008	12.3221	0			0	12.3221	44	0.28005	0	1.2143	0
21113	1	88	2015-12-18	16	0							07:51:51	07:53:11	79	81		11.4427	31	0.36912	11.4427	0			0	11.4427	50	0.22885	0	1.2025	0
21113	1	89	2015-12-18	15	0							07:53:26	07:54:27	60	62		10.3162	23	0.44853	10.3162	0			0	10.3162	39	0.26452	0	1.25	0
21113	1	92	2015-12-18	2	0							08:00:11	08:00:16	4	6		0.60277	5	0.12055	0.60277	0			0	0.60277	1	0.60277	0	1.5	0
21113	1	93	2015-12-18	24	0							08:00:40	08:01:09	28	30		5.5435	12	0.46196	5.5435	0			0	5.5435	18	0.30797	0	1.8571	0
21113	1	94	2015-12-18	47	0							08:01:56	08:02:48	51	53		11.6008	26	0.44618	11.6008	0			0	11.6008	27	0.42966	0	1.9216	0
21113	1	95	2015-12-18	13	0							08:03:01	08:03:36	34	36		5.1087	13	0.39298	5.1087	0			0	5.1087	23	0.22212	0	1.3824	0
21113	1	96	2015-12-18	18	0							08:03:54	08:04:29	34	36		12.8755	18	0.71531	12.8755	0			0	12.8755	18	0.71531	0	1.5294	0
21113	1	97	2015-12-18	13	0							08:04:42	08:05:45	62	64		11.9763	29	0.41298	11.9763	0			0	11.9763	35	0.34218	0	1.2097	0
21113	1	98	2015-12-18	22	0							08:06:07	08:07:33	85	87		17.3715	36	0.48254	17.3715	0			0	17.3715	51	0.34062	0	1.2588	0
21113	1	100	2015-12-18	33	0							08:10:46	08:11:55	68	70		13.2016	31	0.42586	13.2016	0			0	13.2016	39	0.3385	0	1.4853	0
21113	1	103	2015-12-18	26	0							08:18:49	08:19:32	42	44		8.4486	19	0.44466	8.4486	0			0	8.4486	25	0.33794	0	1.619	0
21113	1	107	2015-12-18	26	0							08:29:00	08:30:17	76	78		14.9308	35	0.42659	14.9308	0			0	14.9308	43	0.34723	0	1.3421	0
21113	1	121	2015-12-18	74	0							09:47:19	09:48:32	72	74		10.7065	26	0.41179	10.7065	0			0	10.7065	48	0.22305	0	2.0278	0
21113	1	144	2015-12-18	0	0							11:01:07	11:01:15	7	9		0.70159	4	0.1754	0.70159	0			0	0.70159	5	0.14032	0	1	0
21113	1	145	2015-12-18	0	0							11:01:15	11:01:42	26	28		2.2431	20	0.11215	2.2431	0			0	2.2431	8	0.28038	0	1	0
21113	1	146	2015-12-18	14	0							11:01:56	11:02:59	62	64		8.8439	30	0.2948	8.8439	0			0	8.8439	34	0.26011	0	1.2258	0
21113	1	147	2015-12-18	62	0							11:04:01	11:05:18	76	78		10.1878	26	0.39184	10.1878	0			0	10.1878	52	0.19592	0	1.8158	0
21113	1	148	2015-12-18	19	0							11:05:37	11:06:42	64	66		10.4645	33	0.3171	10.4645	0			0	10.4645	33	0.3171	0	1.2969	0
21113	1	150	2015-12-18	62	0							11:10:20	11:11:41	80	82		13.8241	35	0.39497	13.8241	0			0	13.8241	47	0.29413	0	1.775	0
21113	1	160	2015-12-18	20	0							11:38:09	11:39:13	63	65		8.3696	33	0.25362	8.3696	0			0	8.3696	32	0.26155	0	1.3175	0
21113	1	163	2015-12-18	6	0							11:45:35	11:46:16	40	42		5.2668	17	0.30981	5.2668	0			0	5.2668	25	0.21067	0	1.15	0
21113	1	164	2015-12-18	60	0							11:47:16	11:48:28	71	73		10.3359	25	0.41344	10.3359	0			0	10.3359	48	0.21533	0	1.8451	0
21113	1	165	2015-12-18	23	0							11:48:51	11:50:10	78	80		7.2035	30	0.24012	7.2035	0			0	7.2035	50	0.14407	0	1.2949	0
21113	1	166	2015-12-18	12	0							11:50:22	11:51:33	70	72		7.9348	37	0.21445	7.9348	0			0	7.9348	35	0.22671	0	1.1714	0
21113	1	167	2015-12-18	14	0							11:51:47	11:53:13	85	87		12.8063	32	0.4002	12.8063	0			0	12.8063	55	0.23284	0	1.1647	0
21113	1	188	2015-12-18	76	0							12:57:14	12:58:25	70	72		4.7036	21	0.22398	4.7036	0			0	4.7036	51	0.092227	0	2.0857	0
21113	1	189	2015-12-18	16	0							12:58:41	12:59:51	69	71		8.0632	24	0.33597	8.0632	0			0	8.0632	47	0.17156	0	1.2319	0
21113	1	196	2015-12-18	8	0							13:18:06	13:18:53	46	48		4.2095	10	0.42095	4.2095	0			0	4.2095	38	0.11078	0	1.1739	0
21113	1	197	2015-12-18	17	0							13:19:10	13:20:26	75	77		9.9407	37	0.26867	9.9407	0			0	9.9407	40	0.24852	0	1.2267	0
21113	1	203	2015-12-18	26	0							13:34:42	13:35:45	62	64		7.085	23	0.30804	7.085	0			0	7.085	41	0.1728	0	1.4194	0
21113	1	209	2015-12-18	23	0							13:50:00	13:51:11	70	72		11.8478	38	0.31178	11.8478	0			0	11.8478	34	0.34846	0	1.3286	0
21113	1	210	2015-12-18	20	0							13:51:31	13:52:57	85	87		16.7095	41	0.40755	16.7095	0			0	16.7095	46	0.36325	0	1.2353	0
21113	1	217	2015-12-18	15	0							14:09:25	14:10:10	44	46		9.1996	19	0.48419	9.1996	0			0	9.1996	27	0.34073	0	1.3409	0
21113	1	219	2015-12-18	33	0							14:13:20	14:15:06	105	107		26.7885	60	0.44648	26.7885	0			0	26.7885	47	0.56997	0	1.3143	0
21113	1	232	2015-12-18	15	0							14:47:11	14:48:24	72	74		11.7589	34	0.34585	11.7589	0			0	11.7589	40	0.29397	0	1.2083	0
21113	1	234	2015-12-18	29	0							14:51:45	14:53:21	95	97		15.5336	47	0.3305	15.5336	0			0	15.5336	50	0.31067	0	1.3053	0
21113	1	240	2015-12-18	19	0							15:07:12	15:08:11	58	60		14.9605	32	0.46752	14.9605	0			0	14.9605	28	0.5343	0	1.3276	0
21113	1	243	2015-12-18	15	0							15:13:33	15:14:32	58	60		12.9051	23	0.56109	12.9051	0			0	12.9051	37	0.34879	0	1.2586	0
21113	1	246	2015-12-18	24	0							15:20:06	15:21:27	80	82		20.415	44	0.46398	20.415	0			0	20.415	38	0.53724	0	1.3	0
21113	1	249	2015-12-18	12	0							15:26:54	15:27:47	52	54		13.666	27	0.50615	13.666	0			0	13.666	27	0.50615	0	1.2308	0
21113	1	256	2015-12-18	13	0							15:42:07	15:42:54	46	48		17.3024	10	1.7302	17.3024	0			0	17.3024	38	0.45533	0	1.2826	0
21113	1	257	2015-12-18	5	0							15:42:59	15:43:50	50	52		18.5573	26	0.71374	18.5573	0			0	18.5573	26	0.71374	0	1.1	0
21113	1	259	2015-12-18	16	0							15:45:41	15:46:49	67	69		16.5119	45	0.36693	16.5119	0			0	16.5119	24	0.688	0	1.2388	0
21113	1	260	2015-12-18	7	0							15:46:56	15:47:20	23	25		3.8142	11	0.32249	3.5474	5	-0.12252	1.166	9	2.9348	5	0.58696	0	1.3043	0
21113	1	261	2015-12-18	5	0							15:47:25	15:47:58	32	34		7.085	6	1.1808	7.085	11	-0.081745	1.9565	23	6.1858	5	1.2372	0	1.1563	0
21113	1	270	2015-12-18	8	0							15:59:28	15:59:41	12	14		4.2391	7	0.60559	4.2391	0			0	4.2391	7	0.60559	0	1.6667	0
21113	1	271	2015-12-18	2	0							15:59:43	15:59:48	4	6		1.2253	4	0.30633	1.2253	0			0	1.2253	2	0.61265	0	1.5	0
21113	1	275	2015-12-18	9	0							16:03:00	16:03:40	39	41		9.2787	9	0.9563	8.6067	2	-0.41005	0.672	14	7.7866	18	0.43259	1	1.2308	0
21113	1	276	2015-12-18	7	0							16:03:47	16:04:21	33	35		7.7866	13	0.58225	7.5692	8	-0.028413	0.2174	11	7.3419	11	0.66745	1	1.2121	0
21113	1	277	2015-12-18	5	0							16:04:26	16:04:55	28	30		5.83	7	0.79051	5.5336	4	-0.056825	0.2964	10	5.3063	13	0.40818	1	1.1786	0
21113	1	278	2015-12-18	8	0							16:05:03	16:05:35	31	33		4.7628	8	0.56941	4.5553	8	-0.17539	0.1581	18	3.1522	7	0.45031	1	1.2581	0
21113	1	279	2015-12-18	26	0							16:06:01	16:06:30	28	30		5.0889	7	0.57594	4.0316	6	0.15482	0.6324	14	4.9605	9	0.55117	0	1.9286	0
21113	1	280	2015-12-18	11	0							16:06:41	16:07:08	26	28		5.5731	6	0.75922	4.5553	2	0.36565	1.0178	10	5.2866	12	0.44055	0	1.4231	0
21113	1	281	2015-12-18	20	0							16:07:28	16:08:03	34	36		2.7767	5	0.52174	2.6087	5	-0.15416	0.5928	21	1.8379	10	0.18379	0	1.5882	0
21113	1	282	2015-12-18	57	0							16:09:00	16:09:30	29	31		2.4111	5	0.42094	2.1047	5	0.04348	0.4645	20	2.3221	6	0.38702	0	2.9655	0
21113	1	283	2015-12-18	4	0							16:09:34	16:09:39	4	6		0.99802	4	0.24951	0.99802	0			0	0.99802	2	0.49901	0	2	0
21113	1	284	2015-12-18	0	0							16:09:39	16:09:59	19	21		1.6897	17	0.099394	1.6897	0			0	1.6897	4	0.42242	0	1	0
21113	1	285	2015-12-18	0	0							16:09:59	16:10:11	11	13		2.085	4	0.42985	1.7194	1	0.3656	0.3656	5	2.085	4	0.52125	0	1	0
21113	1	286	2015-12-18	3	0							16:10:14	16:10:26	11	13		1.5316	6	0.25527	1.5316	0			0	1.5316	7	0.2188	0	1.2727	0
																					135	0.65178

## Sheet: benthic dives
birdID	TripNumber	EventNo	Date	SurfaceTime	NoFixes	FirstLat	FirstLon	LastLat	LastLon	SurfaceDist	SurfaceVelo	EvtOnset	EvtEnd	DiveTime		DiveDistance	EvtMaxDepth	DescDur	DescVelo	StartBot	NoWiggles	MeanWigAmp	MaxWigAmp	BottomTime	BottomEnd	AscDur	AscVelo	Benthic dive	diving efficiency
21113	1	8	2015-12-18	12	0							05:34:11	05:34:59	47	49		6.8774	13	0.45455	5.9091	6	0.1548	2.6877	20	6.8379	16	0.42737	1	1.2553
21113	1	9	2015-12-18	14	0							05:35:13	05:36:16	62	64		8.4288	11	0.65577	7.2134	15	0.081027	1.6601	40	8.4288	13	0.64837	1	1.2258
21113	1	10	2015-12-18	9	0							05:36:25	05:37:19	53	55		9.5652	12	0.71723	8.6067	11	0.087136	1.2846	29	9.5652	14	0.68323	1	1.1698
21113	1	11	2015-12-18	19	0							05:37:38	05:38:53	74	76		12.0948	14	0.67335	9.4268	10	0.25692	5.2965	51	11.996	11	1.0905	1	1.2568
21113	1	12	2015-12-18	16	0							05:39:09	05:40:15	65	67		13.3992	27	0.48163	13.0039	6	-0.019767	4.1798	21	12.8853	19	0.67818	1	1.2462
21113	1	13	2015-12-18	19	0							05:40:34	05:41:57	82	84		16.0968	14	0.82157	11.502	9	0.49956	8.3596	55	15.998	15	1.0665	1	1.2317
21113	1	14	2015-12-18	17	0							05:42:14	05:43:28	73	75		17.8063	34	0.46879	15.9387	7	0.2668	4.4269	25	17.8063	16	1.1129	1	1.2329
21113	1	15	2015-12-18	17	0							05:43:45	05:45:14	88	90		19.2095	20	0.56818	11.3636	15	0.52306	7.3715	54	19.2095	16	1.2006	1	1.1932
21113	1	40	2015-12-18	34	0							06:14:24	06:16:34	129	131		41.2944	39	1.0302	40.1778	10	0.10771	0.9288	40	41.2549	52	0.79336	1	1.2636
21113	1	44	2015-12-18	30	0							06:38:58	06:40:50	111	113		50.9585	55	0.90747	49.9111	8	0.12104	1.008	19	50.8794	39	1.3046	1	1.2703
21113	1	45	2015-12-18	42	0							06:41:32	06:44:26	173	175		51.7095	40	1.271	50.8399	30	-0.03228	0.6621	92	49.8715	43	1.1598	1	1.2428
21113	1	46	2015-12-18	38	0							06:45:04	06:47:40	155	157		51.3439	38	1.3288	50.4941	23	-0.016757	0.7905	78	50.1087	41	1.2222	1	1.2452
21113	1	47	2015-12-18	45	0							06:48:25	06:50:42	136	138		51.5613	42	1.1884	49.9111	18	0.014272	1.0474	60	50.168	36	1.3936	1	1.3309
21113	1	48	2015-12-18	46	0							06:51:28	06:54:07	158	160		52.2826	39	1.2848	50.1087	19	0.034326	1.6798	76	50.7609	45	1.128	1	1.2911
21113	1	50	2015-12-18	32	0							06:56:16	06:58:44	147	149		52.7273	43	1.2143	52.2134	20	-0.00889	0.4941	61	52.0356	45	1.1563	1	1.2177
21113	1	51	2015-12-18	49	0							06:59:33	07:02:12	158	160		53.498	37	1.397	51.6897	18	0	1.4822	79	51.6897	44	1.1748	1	1.3101
21113	1	52	2015-12-18	34	0							07:02:46	07:04:52	125	127		50.9684	36	1.3905	50.0593	18	0.031839	0.6917	78	50.6324	13	3.8948	1	1.272
21113	1	59	2015-12-18	28	0							07:10:48	07:12:23	94	96		51.1166	40	1.2129	48.5178	18	0.13395	1.5613	42	50.9289	14	3.6378	1	1.2979
21113	1	68	2015-12-18	31	0							07:23:02	07:24:57	114	116		53.7253	42	1.2684	53.2708	20	-0.058305	0.5929	59	52.1047	15	3.4736	1	1.2719
21113	1	77	2015-12-18	25	0							07:38:27	07:40:56	148	150		52.0158	36	1.4062	50.6225	20	-0.032114	1.3637	65	49.9802	49	1.02	1	1.1689
21113	1	79	2015-12-18	29	0							07:43:10	07:45:27	136	138		51.0869	38	1.3148	49.9605	31	0.022629	0.9387	81	50.662	19	2.6664	1	1.2132
21113	1	90	2015-12-18	35	0							07:55:02	07:57:17	134	136		53.8142	36	1.4248	51.2945	14	0.098107	2.0849	54	52.668	46	1.145	1	1.2612
21113	1	91	2015-12-18	38	0							07:57:55	08:00:09	133	135		54.496	37	1.444	53.4289	20	-0.006425	1.1758	84	53.3004	14	3.8072	1	1.2857
21113	1	99	2015-12-18	29	0							08:08:02	08:10:13	130	132		55.415	37	1.4651	54.2095	26	0.013681	1.9268	77	54.5652	18	3.0314	1	1.2231
21113	1	101	2015-12-18	41	0							08:12:36	08:15:23	166	168		56.2451	36	1.5385	55.3854	36	0.0098806	1.077	86	55.7411	46	1.2118	1	1.247
21113	1	102	2015-12-18	48	0							08:16:11	08:18:23	131	133		55.5336	34	1.6223	55.1581	34	-0.019474	0.5928	81	54.496	18	3.0276	1	1.3664
21113	1	104	2015-12-18	43	0							08:20:15	08:22:45	149	151		55.3953	36	1.5058	54.2095	28	0.040936	0.662	72	55.3557	43	1.2873	1	1.2886
21113	1	105	2015-12-18	48	0							08:23:33	08:25:24	110	112		55.6423	34	1.6162	54.9506	22	0.022009	1.2055	57	55.4348	21	2.6398	1	1.4364
21113	1	106	2015-12-18	58	0							08:26:22	08:28:34	131	133		55.6423	34	1.6162	54.9506	20	0.00395	0.5929	60	55.0296	39	1.411	1	1.4427
21113	1	108	2015-12-18	29	0							08:30:46	08:33:31	164	166		54.8419	36	1.511	54.3972	28	-0.045525	0.4447	91	53.1225	39	1.3621	1	1.1768
21113	1	109	2015-12-18	56	0							08:34:27	08:37:06	158	160		53.1522	35	1.4876	52.0652	31	0.016894	1.087	87	52.5889	38	1.3839	1	1.3544
21113	1	110	2015-12-18	47	0							08:37:53	08:40:25	151	153		53.5474	32	1.624	51.9664	28	0.020468	0.9585	81	52.5395	40	1.3135	1	1.3113
21113	1	111	2015-12-18	50	0							08:41:15	08:43:52	156	158		52.1146	33	1.5661	51.6798	34	-0.0017412	1.1067	88	51.6206	37	1.3952	1	1.3205
21113	1	112	2015-12-18	1977	0							09:16:49	09:19:04	134	136		58.3597	43	1.3117	56.4032	10	0.10375	1.6106	37	57.4407	56	1.0257	1	15.7537
21113	1	113	2015-12-18	46	0							09:19:50	09:22:07	136	138		58.834	40	1.4476	57.9051	24	0.0028833	0.9289	67	57.9743	31	1.8701	1	1.3382
21113	1	114	2015-12-18	90	0							09:23:37	09:25:45	127	129		57.8557	42	1.3554	56.9269	20	-0.03261	0.9288	66	56.2747	21	2.6797	1	1.7087
21113	1	115	2015-12-18	107	0							09:27:32	09:29:48	135	137		57.1047	38	1.4703	55.8696	22	0.014373	0.8498	57	56.1858	42	1.3378	1	1.7926
21113	1	116	2015-12-18	61	0							09:30:49	09:33:16	146	148		56.7491	38	1.4783	56.1759	20	-0.009385	0.5732	62	55.9882	48	1.1664	1	1.4178
21113	1	117	2015-12-18	63	0							09:34:19	09:36:42	142	144		56.7293	35	1.561	54.6344	24	0.077404	1.6799	58	56.4921	51	1.1077	1	1.4437
21113	1	118	2015-12-18	58	0							09:37:40	09:40:10	149	151		56.8182	36	1.5659	56.3736	22	-0.034586	1.1067	57	55.6127	58	0.95884	1	1.3893
21113	1	119	2015-12-18	44	0							09:40:54	09:42:55	120	122		56.5168	34	1.6381	55.6967	18	0.021956	0.8201	68	56.0919	20	2.8046	1	1.3667
21113	1	120	2015-12-18	77	0							09:44:12	09:46:05	112	114		56.1117	35	1.5806	55.3212	16	-0.020381	1.166	56	54.9951	23	2.3911	1	1.6875
21113	1	122	2015-12-18	38	0							09:49:10	09:51:38	147	149		56.0129	37	1.4901	55.1334	18	0.033764	0.8399	50	55.7411	62	0.89905	1	1.2585
21113	1	123	2015-12-18	38	0							09:52:16	09:54:55	158	160		56.0375	35	1.5748	55.1185	16	0.025944	0.8103	63	55.5336	62	0.8957	1	1.2405
21113	1	124	2015-12-18	47	0							09:55:42	09:58:01	138	140		56.1166	36	1.5253	54.911	20	0.04842	0.919	74	55.8794	30	1.8626	1	1.3406
21113	1	125	2015-12-18	76	0							09:59:17	10:01:09	111	113		56.245	37	1.4876	55.0395	16	-0.0043262	1.2055	39	54.9703	37	1.4857	1	1.6847
21113	1	126	2015-12-18	61	0							10:02:10	10:04:41	150	152		56.4427	37	1.4982	55.4348	28	0.0049393	0.8893	71	55.5731	44	1.263	1	1.4067
21113	1	127	2015-12-18	54	0							10:05:35	10:08:18	162	164		57.0059	36	1.5635	56.2846	32	0.013588	0.494	69	56.7194	59	0.96135	1	1.3333
21113	1	128	2015-12-18	50	0							10:09:08	10:11:44	155	157		57.8162	35	1.5923	55.7312	16	0.11364	1.2945	65	57.5495	57	1.0096	1	1.3226
21113	1	129	2015-12-18	47	0							10:12:31	10:14:50	138	140		58.7056	38	1.5282	58.0732	31	0.014342	0.6917	65	58.5178	37	1.5816	1	1.3406
21113	1	130	2015-12-18	54	0							10:15:44	10:18:22	157	159		60.5139	37	1.5957	59.0415	26	0.042188	0.7115	78	60.1384	44	1.3668	1	1.3439
21113	1	131	2015-12-18	54	0							10:19:16	10:21:39	142	144		61.7194	39	1.5572	60.7313	30	0.026678	0.6818	66	61.5316	39	1.5777	1	1.3803
21113	1	132	2015-12-18	57	0							10:22:36	10:25:06	149	151		62.1344	38	1.6211	61.6008	30	0.0065867	1.0573	71	61.7984	42	1.4714	1	1.3826
21113	1	133	2015-12-18	48	0							10:25:54	10:28:25	150	152		61.8775	36	1.7122	61.6403	36	-0.047211	0.3162	80	59.9407	36	1.665	1	1.32
21113	1	134	2015-12-18	51	0							10:29:16	10:31:47	150	152		59.5751	37	1.6069	59.4565	38	-0.064229	0.5434	90	57.0158	25	2.2806	1	1.34
21113	1	135	2015-12-18	76	0							10:33:03	10:35:11	127	129		56.1561	33	1.6864	55.6522	14	-0.039529	0.5039	46	55.0988	50	1.102	1	1.5984
21113	1	136	2015-12-18	86	0							10:36:37	10:38:57	139	141		54.9012	36	1.5195	54.7036	18	-0.059289	0.7905	55	53.6364	50	1.0727	1	1.6187
21113	1	137	2015-12-18	74	0							10:40:11	10:42:11	119	121		54.0711	35	1.539	53.8636	12	-0.050225	1.1067	49	53.2609	37	1.4395	1	1.6218
21113	1	138	2015-12-18	66	0							10:43:17	10:45:36	138	140		54.2095	39	1.3862	54.0613	20	-0.010375	1.0671	50	53.8538	51	1.056	1	1.4783
21113	1	139	2015-12-18	47	0							10:46:23	10:48:33	129	131		54.6047	31	1.7407	53.9625	20	0.008395	0.7708	60	54.1304	40	1.3533	1	1.3643
21113	1	140	2015-12-18	51	0							10:49:24	10:51:46	141	143		54.5553	32	1.6839	53.8834	22	0.0089818	0.5929	68	54.081	43	1.2577	1	1.3617
21113	1	141	2015-12-18	51	0							10:52:37	10:55:00	142	144		55.2372	33	1.6505	54.4664	42	0.015764	0.7807	65	55.1285	46	1.1984	1	1.3592
21113	1	142	2015-12-18	49	0							10:55:49	10:58:13	143	145		55.9486	34	1.6252	55.2569	23	0.024491	0.6028	68	55.8202	43	1.2981	1	1.3427
21113	1	143	2015-12-18	52	0							10:59:05	11:01:07	121	123		54.8419	34	1.4741	50.1186	2	2.2382	4.7233	15	54.5949	74	0.73777	1	1.4298
21113	1	149	2015-12-18	36	0							11:07:18	11:09:18	119	121		55.0297	38	1.4229	54.0712	12	0.053525	0.9387	51	54.7135	32	1.7098	1	1.3025
21113	1	151	2015-12-18	40	0							11:12:21	11:14:31	129	131		54.5059	36	1.4987	53.9526	13	0.014438	0.4051	34	54.1403	61	0.88755	1	1.3101
21113	1	152	2015-12-18	42	0							11:15:13	11:17:36	142	144		54.3775	35	1.5327	53.6462	22	-0.00089545	0.6621	46	53.6265	63	0.85121	1	1.2958
21113	1	153	2015-12-18	41	0							11:18:17	11:20:30	132	134		54.1798	34	1.5604	53.0534	26	0.028881	0.9288	37	53.8043	63	0.85404	1	1.3106
21113	1	154	2015-12-18	34	0							11:21:04	11:23:23	138	140		54.3577	33	1.6206	53.4783	14	0.033171	0.9289	34	53.9427	73	0.73894	1	1.2464
21113	1	155	2015-12-18	37	0							11:24:00	11:26:10	129	131		54.2194	32	1.6687	53.3992	17	0.034294	0.6621	44	53.9822	55	0.98149	1	1.2868
21113	1	156	2015-12-18	42	0							11:26:52	11:29:05	132	134		53.7846	32	1.6524	52.8755	18	0.036233	0.8498	36	53.5277	66	0.81103	1	1.3182
21113	1	157	2015-12-18	33	0							11:29:38	11:31:49	130	132		53.8142	34	1.5682	53.3202	21	0.015524	1.0672	47	53.6462	51	1.0519	1	1.2538
21113	1	158	2015-12-18	43	0							11:32:32	11:34:49	136	138		54.0119	34	1.5761	53.587	20	-0.00198	0.5237	57	53.5474	47	1.1393	1	1.3162
21113	1	159	2015-12-18	39	0							11:35:28	11:37:49	140	142		54.0119	32	1.6802	53.7648	26	-0.0019	0.415	51	53.7154	59	0.91043	1	1.2786
21113	1	161	2015-12-18	30	0							11:39:43	11:42:02	138	140		55.5237	33	1.6565	54.664	20	0.03409	0.4051	66	55.3458	41	1.3499	1	1.2174
21113	1	168	2015-12-18	36	0							11:53:49	11:56:15	145	147		59.5652	40	1.4704	58.8142	14	-0.076229	0.751	60	57.747	47	1.2287	1	1.2483
21113	1	169	2015-12-18	38	0							11:56:53	11:59:08	134	136		56.0277	35	1.5672	54.8518	16	-0.032119	1.1561	51	54.3379	50	1.0868	1	1.2836
21113	1	170	2015-12-18	33	0							11:59:41	12:01:51	129	131		55.4446	35	1.5649	54.7727	16	0.013587	0.6324	47	54.9901	49	1.1222	1	1.2558
21113	1	171	2015-12-18	33	0							12:02:24	12:04:46	141	143		56.2253	35	1.5802	55.3063	16	0.041994	0.5929	54	55.9782	54	1.0366	1	1.234
21113	1	172	2015-12-18	38	0							12:05:24	12:07:42	137	139		56.3933	35	1.587	55.5435	24	0.027171	0.7114	59	56.1956	45	1.2488	1	1.2774
21113	1	173	2015-12-18	37	0							12:08:19	12:10:47	147	149		56.3735	36	1.5481	55.7312	31	0.0035059	0.5929	73	55.8399	40	1.396	1	1.2517
21113	1	174	2015-12-18	42	0							12:11:29	12:14:02	152	154		56.4032	34	1.6362	55.6324	30	0.024047	0.4743	77	56.3538	43	1.3106	1	1.2763
21113	1	175	2015-12-18	42	0							12:14:44	12:17:10	145	147		56.4921	35	1.5991	55.9684	28	0.0017643	0.6028	75	56.0178	37	1.514	1	1.2897
21113	1	176	2015-12-18	39	0							12:17:49	12:20:20	150	152		56.413	33	1.6936	55.8893	34	-0.030806	0.8004	85	54.8419	34	1.613	1	1.26
21113	1	177	2015-12-18	80	0							12:21:40	12:23:36	115	117		55.8597	34	1.6235	55.1976	16	0.030881	0.6324	51	55.6917	32	1.7404	1	1.6957
21113	1	178	2015-12-18	46	0							12:24:22	12:26:23	120	122		55.8498	32	1.7234	55.1482	20	-0.00593	0.7016	54	55.0296	36	1.5286	1	1.3833
21113	1	179	2015-12-18	49	0							12:27:12	12:29:23	130	132		55.6324	31	1.7783	55.1285	14	-0.0028286	0.5039	61	55.0889	40	1.3772	1	1.3769
21113	1	180	2015-12-18	40	0							12:30:03	12:32:18	134	136		55.1779	32	1.7095	54.7036	22	0.017514	0.3557	61	55.0889	43	1.2811	1	1.2985
21113	1	181	2015-12-18	47	0							12:33:05	12:35:26	140	142		55.8004	33	1.6349	53.9526	23	0.079909	1.5415	67	55.7905	42	1.3283	1	1.3357
21113	1	182	2015-12-18	43	0							12:36:09	12:38:34	144	146		55.8794	33	1.6712	55.1482	22	0.015723	0.7115	67	55.4941	46	1.2064	1	1.2986
21113	1	183	2015-12-18	103	0							12:40:17	12:42:40	142	144		56.1957	35	1.5596	54.585	20	0.065215	1.0968	68	55.8893	41	1.3632	1	1.7254
21113	1	184	2015-12-18	51	0							12:43:31	12:45:57	145	147		56.1364	37	1.44	53.2806	14	0.17575	1.9862	56	55.7411	54	1.0322	1	1.3517
21113	1	185	2015-12-18	39	0							12:46:36	12:49:01	144	146		57.0356	35	1.6053	56.1858	27	0.031474	0.6225	65	57.0356	46	1.2399	1	1.2708
21113	1	186	2015-12-18	70	0							12:50:11	12:52:43	151	153		57.1937	36	1.5808	56.9071	36	-0.000275	0.7213	80	56.8972	37	1.5378	1	1.4636
21113	1	187	2015-12-18	51	0							12:53:34	12:55:58	143	145		57.0059	35	1.6124	56.4328	26	-0.00038077	0.5731	69	56.4229	41	1.3762	1	1.3566
21113	1	190	2015-12-18	36	0							13:00:27	13:02:54	146	148		55.8893	37	1.4555	53.8538	26	0.070308	2.0355	63	55.6818	48	1.16	1	1.2466
21113	1	191	2015-12-18	35	0							13:03:29	13:05:59	149	151		56.67	37	1.5164	56.1067	30	0.0032933	1.5218	82	56.2055	32	1.7564	1	1.2349
21113	1	192	2015-12-18	44	0							13:06:43	13:09:02	138	140		56.8182	34	1.6633	56.5514	37	0.0010676	0.3657	68	56.5909	38	1.4892	1	1.3188
21113	1	193	2015-12-18	43	0							13:09:45	13:12:07	141	143		57.2925	33	1.7248	56.917	28	0.003175	0.9684	73	57.0059	37	1.5407	1	1.305
21113	1	194	2015-12-18	38	0							13:12:45	13:15:01	135	137		57.5692	32	1.7787	56.917	20	-0.018775	0.9981	67	56.5415	38	1.4879	1	1.2815
21113	1	195	2015-12-18	37	0							13:15:38	13:17:58	139	141		57.7174	33	1.7209	56.7885	10	0.04842	0.9289	22	57.2727	86	0.66596	1	1.2662
21113	1	198	2015-12-18	40	0							13:21:06	13:22:54	107	109		57.8656	36	1.57	56.5217	14	0.023293	1.3439	32	56.8478	41	1.3865	1	1.3738
21113	1	199	2015-12-18	45	0							13:23:39	13:25:41	121	123		55.8696	34	1.6136	54.8617	18	-0.049411	2.7273	57	53.9723	32	1.6866	1	1.3719
21113	1	200	2015-12-18	41	0							13:26:22	13:28:25	122	124		52.915	31	1.6744	51.9071	13	-0.0038	1.0079	56	51.8577	37	1.4016	1	1.3361
21113	1	201	2015-12-18	41	0							13:29:06	13:31:23	136	138		52.2332	31	1.6473	51.0672	25	0.037548	0.7312	78	52.0059	29	1.7933	1	1.3015
21113	1	202	2015-12-18	45	0							13:32:08	13:34:16	127	129		52.8953	35	1.4763	51.67	20	0.05237	1.0475	57	52.7174	37	1.4248	1	1.3543
21113	1	204	2015-12-18	32	0							13:36:17	13:38:11	113	115		51.7194	30	1.664	49.9209	16	0.098819	1.5118	37	51.502	48	1.073	1	1.2832
21113	1	205	2015-12-18	34	0							13:38:45	13:41:00	134	136		52.8656	32	1.5943	51.0178	31	0.050681	0.583	69	52.5889	35	1.5025	1	1.2537
21113	1	206	2015-12-18	48	0							13:41:48	13:43:57	128	130		53.8142	32	1.6419	52.5395	26	0.030785	0.4743	54	53.3399	44	1.2123	1	1.375
21113	1	207	2015-12-18	40	0							13:44:37	13:46:49	131	133		54.4071	32	1.6783	53.7055	24	0.0057667	0.4743	54	53.8439	47	1.1456	1	1.3053
21113	1	208	2015-12-18	40	0							13:47:29	13:49:37	127	129		54.8221	34	1.5932	54.17	14	0.028229	0.5928	40	54.5652	55	0.99209	1	1.315
21113	1	211	2015-12-18	28	0							13:53:25	13:55:40	134	136		55.8696	35	1.5697	54.9407	23	0.027926	0.5731	60	55.583	41	1.3557	1	1.209
21113	1	212	2015-12-18	40	0							13:56:20	13:58:16	115	117		56.0573	33	1.6523	54.5257	11	0.13385	1.5316	23	55.998	61	0.918	1	1.3478
21113	1	213	2015-12-18	26	0							13:58:42	14:00:50	127	129		55.8103	33	1.6385	54.0711	14	0.09035	1.7392	52	55.336	44	1.2576	1	1.2047
21113	1	214	2015-12-18	33	0							14:01:23	14:03:37	133	135		55.3063	34	1.6165	54.9605	22	-0.00045	0.6423	68	54.9506	33	1.6652	1	1.2481
21113	1	215	2015-12-18	35	0							14:04:12	14:06:17	124	126		55.4743	33	1.6556	54.6344	18	-0.065878	0.919	60	53.4486	33	1.6197	1	1.2823
21113	1	216	2015-12-18	39	0							14:06:56	14:09:10	133	135		55.9289	32	1.7147	54.8715	15	0.059953	0.6621	64	55.7708	39	1.43	1	1.2932
21113	1	218	2015-12-18	26	0							14:10:36	14:12:47	130	132		56.749	36	1.5305	55.0988	15	0.091567	1.3538	55	56.4723	41	1.3774	1	1.2
21113	1	220	2015-12-18	30	0							14:15:36	14:17:54	137	139		56.6502	36	1.5495	55.7806	25	0.007116	0.8202	63	55.9585	40	1.399	1	1.219
21113	1	221	2015-12-18	34	0							14:18:28	14:20:35	126	128		55.2174	34	1.5944	54.2095	22	-0.0080864	0.9684	59	54.0316	35	1.5438	1	1.2698
21113	1	222	2015-12-18	36	0							14:21:11	14:23:31	139	141		50.83	32	1.5613	49.9605	25	-0.17075	0.8695	80	45.6917	29	1.5756	1	1.259
21113	1	223	2015-12-18	32	0							14:24:03	14:26:09	125	127		46.0277	27	1.6465	44.4565	24	0.055996	0.3953	66	45.8004	34	1.3471	1	1.256
21113	1	224	2015-12-18	31	0							14:26:40	14:28:44	123	125		46.9466	30	1.556	46.6798	17	-0.11509	0.9387	67	44.7233	28	1.5973	1	1.252
21113	1	225	2015-12-18	32	0							14:29:16	14:31:18	121	123		44.9407	27	1.6473	44.4763	21	-0.031057	0.5237	61	43.8241	35	1.2521	1	1.2645
21113	1	226	2015-12-18	36	0							14:31:54	14:34:00	125	127		44.1304	27	1.5979	43.1423	20	0.01927	0.9881	62	43.5277	38	1.1455	1	1.288
21113	1	227	2015-12-18	27	0							14:34:27	14:36:31	123	125		44.5949	28	1.5355	42.9941	23	0.054991	0.7411	64	44.2589	33	1.3412	1	1.2195
21113	1	228	2015-12-18	29	0							14:37:00	14:39:02	121	123		45.6621	28	1.6276	45.5731	20	-0.11759	0.4545	64	43.2213	31	1.3942	1	1.2397
21113	1	229	2015-12-18	31	0							14:39:33	14:41:37	123	125		45.0198	29	1.5343	44.496	16	-0.062375	0.5238	60	43.498	36	1.2083	1	1.252
21113	1	230	2015-12-18	29	0							14:42:06	14:44:12	125	127		46.996	29	1.5446	44.7925	11	0.16888	1.3043	53	46.6502	45	1.0367	1	1.232
21113	1	231	2015-12-18	31	0							14:44:43	14:46:56	132	134		51.5613	33	1.54	50.8202	25	0.026876	0.6126	55	51.4921	46	1.1194	1	1.2348
21113	1	233	2015-12-18	34	0							14:48:58	14:51:16	137	139		52.2628	35	1.4593	51.0771	14	0.019057	1.334	62	51.3439	42	1.2225	1	1.2482
21113	1	235	2015-12-18	25	0							14:53:46	14:56:05	138	140		51.4526	41	1.2516	51.3142	28	-0.0070571	0.5139	65	51.1166	34	1.5034	1	1.1812
21113	1	236	2015-12-18	34	0							14:56:39	14:58:46	126	128		52.3518	35	1.4393	50.3755	24	0.077817	1.1858	63	52.2431	30	1.7414	1	1.2698
21113	1	237	2015-12-18	40	0							14:59:26	15:01:29	122	124		52.668	32	1.5955	51.0573	13	0.10718	1.5514	52	52.4506	40	1.3113	1	1.3279
21113	1	238	2015-12-18	34	0							15:02:03	15:04:09	125	127		52.2332	33	1.5544	51.2945	24	0.030879	0.9387	59	52.0356	35	1.4867	1	1.272
21113	1	239	2015-12-18	33	0							15:04:42	15:06:53	130	132		52.1146	32	1.5946	51.0277	15	0.0013133	1.0869	66	51.0474	34	1.5014	1	1.2538
21113	1	241	2015-12-18	27	0							15:08:38	15:10:45	126	128		50.0791	33	1.4849	49.002	12	-0.025525	1.0771	53	48.6957	42	1.1594	1	1.2143
21113	1	242	2015-12-18	32	0							15:11:17	15:13:18	120	122		47.9743	32	1.4658	46.9071	15	-0.017127	1.0672	54	46.6502	36	1.2958	1	1.2667
21113	1	244	2015-12-18	24	0							15:14:56	15:17:02	125	127		52.8557	34	1.4648	49.8024	14	0.19551	2.2826	54	52.5395	39	1.3472	1	1.192
21113	1	245	2015-12-18	31	0							15:17:33	15:19:42	128	130		53.4289	34	1.5389	52.3221	16	-0.071019	0.8696	60	51.1858	36	1.4218	1	1.2422
21113	1	247	2015-12-18	23	0							15:21:50	15:24:03	132	134		49.9407	33	1.487	49.0711	16	-0.0055563	1.1265	67	48.9822	34	1.4407	1	1.1742
21113	1	248	2015-12-18	32	0							15:24:35	15:26:42	126	128		48.2806	30	1.5655	46.9664	14	0.032464	1.3142	49	47.4209	49	0.96777	1	1.254
21113	1	250	2015-12-18	24	0							15:28:11	15:30:13	121	123		46.2549	28	1.5627	43.7549	20	0.03508	1.0969	63	44.4565	32	1.3893	1	1.1983
21113	1	251	2015-12-18	27	0							15:30:40	15:32:48	127	129		44.081	29	1.5023	43.5672	36	-0.0019222	2.2332	75	43.498	25	1.7399	1	1.2126
21113	1	252	2015-12-18	42	0							15:33:30	15:35:38	127	129		42.7964	31	1.356	42.0356	22	-0.044918	1.2154	67	41.0474	31	1.3241	1	1.3307
21113	1	253	2015-12-18	25	0							15:36:03	15:37:57	113	115		39.002	24	1.5934	38.2411	21	-0.072462	1.0573	61	36.7194	30	1.224	1	1.2212
21113	1	254	2015-12-18	24	0							15:38:21	15:40:05	103	105		35.3755	24	1.4649	35.1581	18	-0.14053	2.1343	57	32.6285	24	1.3595	1	1.233
21113	1	255	2015-12-18	21	0							15:40:26	15:41:54	87	89		31.581	23	1.3516	31.087	14	-0.655	2.8557	50	21.917	16	1.3698	1	1.2414
21113	1	263	2015-12-18	15	0							15:49:35	15:50:39	63	65		22.4012	15	1.4539	21.8083	8	0.0247	2.1047	24	22.0059	26	0.84638	1	1.2381
21113	1	264	2015-12-18	19	0							15:50:58	15:51:51	52	54		21.5909	19	1.113	21.1462	6	-0.11198	0.2865	13	20.4743	22	0.93065	1	1.3654
21113	1	265	2015-12-18	11	0							15:52:02	15:53:33	90	92		20.8992	16	1.2809	20.4941	22	-0.013477	4.3281	63	20.1976	13	1.5537	1	1.1222
21113	1	266	2015-12-18	25	0							15:53:58	15:54:58	59	61		19.7628	24	0.78887	18.9328	8	-0.0037	2.4308	20	18.9032	17	1.112	1	1.4237
21113	1	267	2015-12-18	13	0							15:55:11	15:56:50	98	100		19.1897	13	1.4541	18.9032	32	-0.0030906	6.9071	72	18.8043	15	1.2536	1	1.1327
21113	1	272	2015-12-18	9	0							15:59:57	16:00:56	58	60		15.0889	12	1.1561	13.8735	11	0.088036	4.7826	34	14.8419	14	1.0601	1	1.1552
21113	1	273	2015-12-18	11	0							16:01:07	16:01:56	48	50		13.587	15	0.87615	13.1423	6	-0.33103	1.166	24	11.1561	11	1.0142	1	1.2292
21113	1	274	2015-12-18	8	0							16:02:04	16:02:51	46	48		11.1462	10	1.0751	10.751	6	0.0049333	0.3952	17	10.7806	21	0.51336	1	1.1739
21113	1	275	2015-12-18	9	0							16:03:00	16:03:40	39	41		9.2787	9	0.9563	8.6067	2	-0.41005	0.672	14	7.7866	18	0.43259	1	1.2308
21113	1	276	2015-12-18	7	0							16:03:47	16:04:21	33	35		7.7866	13	0.58225	7.5692	8	-0.028413	0.2174	11	7.3419	11	0.66745	1	1.2121
21113	1	277	2015-12-18	5	0							16:04:26	16:04:55	28	30		5.83	7	0.79051	5.5336	4	-0.056825	0.2964	10	5.3063	13	0.40818	1	1.1786
21113	1	278	2015-12-18	8	0							16:05:03	16:05:35	31	33		4.7628	8	0.56941	4.5553	8	-0.17539	0.1581	18	3.1522	7	0.45031	1	1.2581
																	48.7221	32.0812	1.45202
																	62.1344	7.69088	0.283461
																		34	1.5544
																		7	0.46879
																		55	1.7787
																			Zweistichproben t-Test unter der Annahme gleicher Varianzen
																				Variable 1	Variable 2
																			Mittelwert	1.45202	1.36457
																			Varianz	0.0808555	0.330129
																			Beobachtungen	160	160
																			Gepoolte Varianz	0.205492
																			Hypothetische Differenz der Mittelwerte	0
																			Freiheitsgrade (df)	318
																			t-Statistik	1.72548
																			P(T<=t) einseitig	0.0427064
																			Kritischer t-Wert bei einseitigem t-Test	1.64966
																			P(T<=t) zweiseitig	0.0854129
																			Kritischer t-Wert bei zweiseitigem t-Test	1.96745

## Sheet: temporal distribution of dives
BottomDive	hour			hour	benthic	pelagic	total
0	5			5	6	24	30	20	80	81.2797
0	5			6	8	13	21	38.0952	61.9048	14.0588
0	5			7	7	33	40	17.5	82.5
0	5			8	10	10	20	50	50
0	5			9	13	1	14	92.8571	7.14286
0	5			10	18	0	18	100	0
0	5			11	15	12	27	55.5556	44.4444
0	5			12	17	2	19	89.4737	10.5263
0	5			13	19	5	24	79.1667	20.8333
0	5			14	20	4	24	83.3333	16.6667
1	5			15	24	11	35	68.5714	31.4286
1	5			16	2	12	14	14.2857	85.7143
1	5
1	5
1	5
1	5
0	5
0	5
0	5
0	5
0	5
0	5
0	5
0	5
0	5
0	5
0	5
0	5
0	5
0	5
0	6
0	6
0	6
0	6
0	6
0	6
0	6
0	6
0	6
1	6
0	6
0	6
0	6
1	6							0.160839
1	6
1	6
1	6
1	6
0	6
1	6
1	6
1	7
0	7
0	7
0	7
0	7
0	7
0	7
1	7
0	7
0	7
0	7
0	7
0	7
0	7
0	7
0	7
1	7
0	7
0	7
0	7
0	7
0	7
0	7
0	7
0	7
1	7
0	7
1	7
0	7
0	7
0	7
0	7
0	7
0	7
0	7
0	7
0	7
0	7
1	7
1	7
0	8
0	8
0	8
0	8
0	8
0	8
0	8
1	8
0	8
1	8
1	8
0	8
1	8
1	8
1	8
0	8
1	8
1	8
1	8
1	8
1	9
1	9
1	9
1	9
1	9
1	9
1	9
1	9
1	9
0	9
1	9
1	9
1	9
1	9
1	10
1	10
1	10
1	10
1	10
1	10
1	10
1	10
1	10
1	10
1	10
1	10
1	10
1	10
1	10
1	10
1	10
1	10
0	11
0	11
0	11
0	11
0	11
1	11
0	11
1	11
1	11
1	11
1	11
1	11
1	11
1	11
1	11
1	11
0	11
1	11
1	11
0	11
0	11
0	11
0	11
0	11
1	11
1	11
1	11
1	12
1	12
1	12
1	12
1	12
1	12
1	12
1	12
1	12
1	12
1	12
1	12
1	12
1	12
1	12
1	12
1	12
0	12
0	12
1	13
1	13
1	13
1	13
1	13
1	13
0	13
0	13
1	13
1	13
1	13
1	13
1	13
0	13
1	13
1	13
1	13
1	13
1	13
0	13
0	13
1	13
1	13
1	13
1	14
1	14
1	14
0	14
1	14
0	14
1	14
1	14
1	14
1	14
1	14
1	14
1	14
1	14
1	14
1	14
1	14
1	14
0	14
1	14
0	14
1	14
1	14
1	14
1	15
1	15
0	15
1	15
1	15
0	15
1	15
1	15
0	15
1	15
1	15
0	15
1	15
1	15
1	15
1	15
1	15
1	15
0	15
0	15
1	15
0	15
0	15
0	15
1	15
1	15
1	15
1	15
1	15
1	15
1	15
1	15
0	15
0	15
1	15
1	16
1	16
0	16
0	16
0	16
0	16
0	16
0	16
0	16
0	16
0	16
0	16
0	16
0	16
159
55.5944

## Sheet: surface breathing
		frames		time (s)						above			below				bottom dive	(Alle)
after Event	bottom dive	above	below	above	below	TOTAL	EvtNo	RelativeTimeOfSurfInt		n	mean	sd	n	mean	sd
145	0	3134	3151	0.566667	0.833333	1.4	1	455	0	193	0.770812	0.224814	182	1.52564	1.18855		Zeilenbeschriftungen	meanBreathingTime	TotalBreathingTime	TotalSurfaceTime
145	0	3176	3189	0.433333	1.1	1.53333	2	413	9.23077								145	0.54	5.4	15.1667
145	0	3222	3236	0.466667	1.2	1.66667	3	367	19.3407								146	0.660417	10.5667	62.0333
145	0	3272	3289	0.566667	1.3	1.86667	4	317	30.3297								147	0.692593	6.23333	19.0333
145	0	3328	3343	0.5	0.7	1.2	5	261	42.6374								148	0.816667	13.0667	36.5333
145	0	3364	3381	0.566667	1.13333	1.7	6	225	50.5495								149	0.666667	12.6667	61.8667
145	0	3415	3431	0.533333	1.1	1.63333	7	174	61.7582								150	0.777273	17.1	39.4
145	0	3464	3484	0.666667	1.2	1.86667	8	125	72.5275								151	0.882456	16.7667	40.6333
145	0	3520	3538	0.6	1.2	1.8	9	69	84.8352								152	0.801449	18.4333	40.5333
145	0	3574	3589	0.5		0.5	10	15	96.7033								153	0.785185	14.1333	32.4667
146	0	5408	5426	0.6	1.46667	2.06667	1		0								154	0.826667	16.5333	36.7667
146	0	5470	5488	0.6	2.76667	3.36667	2		3.33154								155	0.946032	19.8667	42
146	0	5571	5588	0.566667	2.1	2.66667	3		8.75873								Gesamtergebnis	0.781174	150.767	426.433
146	0	5651	5671	0.666667	3.13333	3.8	4		13.0575
146	0	5765	5786	0.7	2.16667	2.86667	5		19.1832
146	0	5851	5871	0.666667	2.9	3.56667	6		23.8044
146	0	5958	5977	0.633333	2.13333	2.76667	7		29.554
146	0	6041	6061	0.666667	5.56667	6.23333	8		34.014
146	0	6228	6251	0.766667	8.2	8.96667	9		44.0623
146	0	6497	6521	0.8	6.4	7.2	10		58.5169
146	0	6713	6717	0.133333	5.53333	5.66667	11		70.1236
146	0	6883	6908	0.833333	4.76667	5.6	12		79.2585
146	0	7051	7076	0.833333	1	1.83333	13		88.2859
146	0	7106	7125	0.633333	1.83333	2.46667	14		91.2413
146	0	7180	7206	0.866667	1.5	2.36667	15		95.2176								After pelagic dives
146	0	7251	7269	0.6		0.6	16		99.0328									meanBreathingTime	TotalBreathingTime	TotalSurfaceTime	RelativeBreathingTime	CorrWithSurfaceStage	p
147	0	9565	9588	0.766667	0.966667	1.73333	1		0								145	0.54	5.4	15.1667	0.356044	0.280692	0.4321
147	0	9617	9635	0.6	1.8	2.4	2		9.10683								146	0.660417	10.5667	62.0333	0.170339	0.125572	0.6431
147	0	9689	9712	0.766667	1.9	2.66667	3		21.7163								147	0.692593	6.23333	19.0333	0.327496	0	1
147	0	9769	9787	0.6	1.76667	2.36667	4		35.7268								148	0.816667	13.0667	36.5333	0.357664	0.686066	0.003341
147	0	9840	9858	0.6	2.03333	2.63333	5		48.1611								150	0.777273	17.1	39.4	0.43401	0.393736	<0.001
147	0	9919	9935	0.533333	1.16667	1.7	6		61.9965									0.69739	10.4733	34.4333	0.32911
147	0	9970	9997	0.9	2.53333	3.43333	7		70.9282									0.0967159	4.34426	16.7284	0.0868974
147	0	10073	10095	0.733333	0.633333	1.36667	8		88.9667
147	0	10114	10136	0.733333		0.733333	9		96.1471								After bottom dives	meanBreathingTime	TotalBreathingTime	TotalSurfaceTime
148	0	12041	12063	0.733333	1.1	1.83333	1		0								149	0.666667	12.6667	61.8667	0.204741	0.423366	0.07089
148	0	12096	12119	0.766667	0.666667	1.43333	2		5.01825								151	0.882456	16.7667	40.6333	0.412633	0.569969	0.01084
148	0	12139	12158	0.633333	1.1	1.73333	3		8.94161								152	0.801449	18.4333	40.5333	0.45477	0.731491	<0.001
148	0	12191	12212	0.7	1.1	1.8	4		13.6861								153	0.785185	14.1333	32.4667	0.435318	0.513477	<0.001
148	0	12245	12266	0.7	2.56667	3.26667	5		18.6131								154	0.826667	16.5333	36.7667	0.449683	0.513477	<0.001
148	0	12343	12365	0.733333	1.76667	2.5	6		27.5547								155	0.946032	19.8667	42	0.473016	0.720085	<0.001
148	0	12418	12445	0.9	2.33333	3.23333	7		34.3978									0.848358	17.1467	38.48	0.405027
148	0	12515	12538	0.766667	1.36667	2.13333	8		43.2482									0.0589315	1.93156	3.47388	0.0914519
148	0	12579	12598	0.633333	1.73333	2.36667	9		49.0876
148	0	12650	12676	0.866667	1	1.86667	10		55.5657
148	0	12706	12734	0.933333	2.36667	3.3	11		60.6752								Pooled Pelagic					0.415092	<0.001
148	0	12805	12832	0.9	0.933333	1.83333	12		69.708
148	0	12860	12894	1.13333	2.43333	3.56667	13		74.7263								Pooled Benthic					0.549695	<0.001
148	0	12967	12991	0.8	1.96667	2.76667	14		84.4891
148	0	13050	13077	0.9	1.03333	1.93333	15		92.062
148	0	13108	13137	0.966667		0.966667	16		97.354
149	1	16670	16690	0.666667	0.566667	1.23333	1		0
149	1	16707	16727	0.666667	1.96667	2.63333	2		1.99353
149	1	16786	16800	0.466667	1.26667	1.73333	3		6.25
149	1	16838	16854	0.533333	2.73333	3.26667	4		9.05172
149	1	16936	16950	0.466667	2.2	2.66667	5		14.3319
149	1	17016	17032	0.533333	1.83333	2.36667	6		18.6422
149	1	17087	17107	0.666667	1.16667	1.83333	7		22.4677
149	1	17142	17164	0.733333	1.76667	2.5	8		25.431
149	1	17217	17239	0.733333	2.73333	3.46667	9		29.472
149	1	17321	17341	0.666667	3.8	4.46667	10		35.0754
149	1	17455	17477	0.733333	3.1	3.83333	11		42.2953
149	1	17570	17589	0.633333	2.23333	2.86667	12		48.4914
149	1	17656	17674	0.6	2.33333	2.93333	13		53.125
149	1	17744	17769	0.833333	2.06667	2.9	14		57.8664
149	1	17831	17844	0.433333	5.73333	6.16667	15		62.5539
149	1	18016	18047	1.03333	7.96667	9	16		72.5216
149	1	18286	18309	0.766667	2.43333	3.2	17		87.069
149	1	18382	18405	0.766667	3.3	4.06667	18		92.2414
149	1	18504	18526	0.733333		0.733333	19		98.8147
150	0	20941	20961	0.666667	0.666667	1.33333	1		0
150	0	20981	21001	0.666667	0.866667	1.53333	2		3.38409
150	0	21027	21046	0.633333	0.7	1.33333	3		7.2758
150	0	21067	21090	0.766667	0.833333	1.6	4		10.6599
150	0	21115	21140	0.833333	1.26667	2.1	5		14.7208
150	0	21178	21199	0.7	0.933333	1.63333	6		20.0508
150	0	21227	21256	0.966667	2.63333	3.6	7		24.1963
150	0	21335	21358	0.766667	1.03333	1.8	8		33.3333
150	0	21389	21409	0.666667	1.3	1.96667	9		37.9019
150	0	21448	21456	0.266667	0.633333	0.9	10		42.8934
150	0	21475	21482	0.233333	0.166667	0.4	11		45.1777
150	0	21487	21518	1.03333	1.86667	2.9	12		46.1929
150	0	21574	21602	0.933333	1.13333	2.06667	13		53.5533
150	0	21636	21650	0.466667	0.866667	1.33333	14		58.7986
150	0	21676	21711	1.16667	1.2	2.36667	15		62.1827
150	0	21747	21762	0.5	1.2	1.7	16		68.1895
150	0	21798	21825	0.9	1.23333	2.13333	17		72.5042
150	0	21862	21889	0.9	0.966667	1.86667	18		77.9188
150	0	21918	21954	1.2	1.4	2.6	19		82.6565
150	0	21996	22025	0.966667	0.933333	1.9	20		89.2555
150	0	22053	22082	0.966667	0.466667	1.43333	21		94.0778
150	0	22096	22123	0.9		0.9	22		97.7157
151	1	26002	26021	0.633333	1.36667	2	1		0
151	1	26062	26084	0.733333	1	1.73333	2		4.92207
151	1	26114	26136	0.733333	0.7	1.43333	3		9.18786
151	1	26157	26181	0.8	0.733333	1.53333	4		12.7153
151	1	26203	26222	0.633333	0.966667	1.6	5		16.4889
151	1	26251	26271	0.666667	1.83333	2.5	6		20.4266
151	1	26326	26345	0.633333	1.46667	2.1	7		26.5792
151	1	26389	26409	0.666667	1.3	1.96667	8		31.7473
151	1	26448	26474	0.866667	2.23333	3.1	9		36.5874
151	1	26541	26568	0.9	1.66667	2.56667	10		44.2166
151	1	26618	26648	1	1.8	2.8	11		50.5332
151	1	26702	26747	1.5	3.8	5.3	12		57.4241
151	1	26861	26878	0.566667	0.766667	1.33333	13		70.4676
151	1	26901	26934	1.1	0.7	1.8	14		73.749
151	1	26955	26996	1.36667	0.533333	1.9	15		78.1788
151	1	27012	27051	1.3	1.33333	2.63333	16		82.8548
151	1	27091	27117	0.866667	1.23333	2.1	17		89.3355
151	1	27154	27183	0.966667	0.433333	1.4	18		94.5037
151	1	27196	27221	0.833333		0.833333	19		97.9491
152	1	31469	31488	0.633333	0.566667	1.2	1		0
152	1	31505	31529	0.8	0.633333	1.43333	2		2.96053
152	1	31548	31567	0.633333	1.1	1.73333	3		6.49671
152	1	31600	31621	0.7	1.23333	1.93333	4		10.773
152	1	31658	31682	0.8	0.933333	1.73333	5		15.5428
152	1	31710	31721	0.366667	0.6	0.966667	6		19.8191
152	1	31739	31759	0.666667	0.9	1.56667	7		22.2039
152	1	31786	31810	0.8	0.8	1.6	8		26.0691
152	1	31834	31857	0.766667	1.36667	2.13333	9		30.0164
152	1	31898	31925	0.9	1.2	2.1	10		35.2796
152	1	31961	31980	0.633333	0.666667	1.3	11		40.4605
152	1	32000	32024	0.8	1.03333	1.83333	12		43.6678
152	1	32055	32080	0.833333	1.16667	2	13		48.1908
152	1	32115	32140	0.833333	1.06667	1.9	14		53.125
152	1	32172	32199	0.9	1.16667	2.06667	15		57.8125
152	1	32234	32255	0.7	1.4	2.1	16		62.9112
152	1	32297	32323	0.866667	1.4	2.26667	17		68.0921
152	1	32365	32390	0.833333	1.13333	1.96667	18		73.6842
152	1	32424	32454	1	1.06667	2.06667	19		78.5362
152	1	32486	32516	1	1.03333	2.03333	20		83.6349
152	1	32547	32576	0.966667	0.833333	1.8	21		88.6513
152	1	32601	32632	1.03333	0.8	1.83333	22		93.0921
152	1	32656	32685	0.966667		0.966667	23		97.6151
153	1	36657	36680	0.766667	0.566667	1.33333	1		0
153	1	36697	36700	0.1	0.6	0.7	2		4.10678
153	1	36718	36736	0.6	0.7	1.3	3		6.26283
153	1	36757	36776	0.633333	1.53333	2.16667	4		10.2669
153	1	36822	36843	0.7	1.46667	2.16667	5		16.9405
153	1	36887	36907	0.666667	0.766667	1.43333	6		23.614
153	1	36930	36953	0.766667	1.03333	1.8	7		28.0287
153	1	36984	37002	0.6	1.3	1.9	8		33.5729
153	1	37041	37066	0.833333	1.13333	1.96667	9		39.4251
153	1	37100	37125	0.833333	1.4	2.23333	10		45.4825
153	1	37167	37194	0.9	1.3	2.2	11		52.3614
153	1	37233	37256	0.766667	0.933333	1.7	12		59.1376
153	1	37284	37314	1	1.43333	2.43333	13		64.3737
153	1	37357	37383	0.866667	1	1.86667	14		71.8686
153	1	37413	37443	1	1.46667	2.46667	15		77.6181
153	1	37487	37516	0.966667	0.5	1.46667	16		85.2156
153	1	37531	37560	0.966667	1.2	2.16667	17		89.7331
153	1	37596	37631	1.16667		1.16667	18		96.4066
154	1	41793	41814	0.7	0.666667	1.36667	1		0
154	1	41834	41850	0.533333	0.666667	1.2	2		3.71714
154	1	41870	41886	0.533333	0.6	1.13333	3		6.98096
154	1	41904	41922	0.6	1.6	2.2	4		10.0635
154	1	41970	41989	0.633333	0.733333	1.36667	5		16.0471
154	1	42011	42045	1.13333	1.7	2.83333	6		19.7643
154	1	42096	42118	0.733333	1.6	2.33333	7		27.4705
154	1	42166	42190	0.8	0.933333	1.73333	8		33.8169
154	1	42218	42247	0.966667	1.36667	2.33333	9		38.5313
154	1	42288	42315	0.9	1.3	2.2	10		44.8776
154	1	42354	42386	1.06667	1.33333	2.4	11		50.8613
154	1	42426	42437	0.366667	1.33333	1.7	12		57.3889
154	1	42477	42501	0.8	0.633333	1.43333	13		62.0127
154	1	42520	42547	0.9	1.06667	1.96667	14		65.9112
154	1	42579	42608	0.966667	1	1.96667	15		71.2602
154	1	42638	42673	1.16667	1.03333	2.2	16		76.6092
154	1	42704	42711	0.233333	0.9	1.13333	17		82.5929
154	1	42738	42763	0.833333	0.866667	1.7	18		85.6754
154	1	42789	42817	0.933333	0.9	1.83333	19		90.2992
154	1	42844	42896	1.73333		1.73333	20		95.2856
155	1	46741	46759	0.6	0.666667	1.26667	1		0
155	1	46779	46799	0.666667	0.6	1.26667	2		3.01587
155	1	46817	46837	0.666667	1.86667	2.53333	3		6.03175
155	1	46893	46909	0.533333	0.766667	1.3	4		12.0635
155	1	46932	46953	0.7	0.9	1.6	5		15.1587
155	1	46980	47001	0.7	1.06667	1.76667	6		18.9683
155	1	47033	47058	0.833333	1.3	2.13333	7		23.1746
155	1	47097	47119	0.733333	0.766667	1.5	8		28.254
155	1	47142	47167	0.833333	2.7	3.53333	9		31.8254
155	1	47248	47273	0.833333	1.16667	2	10		40.2381
155	1	47308	47336	0.933333	0.966667	1.9	11		45
155	1	47365	47394	0.966667	0.866667	1.83333	12		49.5238
155	1	47420	47445	0.833333	1.23333	2.06667	13		53.8889
155	1	47482	47504	0.733333	0.9	1.63333	14		58.8095
155	1	47531	47554	0.766667	1.46667	2.23333	15		62.6984
155	1	47598	47644	1.53333	3.13333	4.66667	16		68.0159
155	1	47738	47764	0.866667	0.733333	1.6	17		79.127
155	1	47786	47818	1.06667	1.03333	2.1	18		82.9365
155	1	47849	47881	1.06667	1.46667	2.53333	19		87.9365
155	1	47925	47955	1	0.533333	1.53333	20		93.9683
155	1	47971	48001	1		1	21		97.619

## Sheet: flipper frq & angle
dive no	bottom dive	phase	relative dive time	flipper beat no	frame no	angle left	angle right	mean angle	time of dive	BPM	note
152	1	descent	0	1	27228	70	65	67.5	0	180
152	1	descent	0.00235571	2	27238	70	70	70	0.333333	163.636
152	1	descent	0.004947	3	27249	75	75	75	0.7	163.636
152	1	descent	0.00753828	4	27260	75	75	75	1.06667	180
152	1	descent	0.00989399	5	27270	70	75	72.5	1.4	163.636
152	1	descent	0.0124853	6	27281	75	80	77.5	1.76667	163.636
152	1	descent	0.0150766	7	27292	70	75	72.5	2.13333	163.636
152	1	descent	0.0176678	8	27303	70	75	72.5	2.5	150
152	1	descent	0.0204947	9	27315	75	75	75	2.9	150
152	1	descent	0.0233216	10	27327	70	70	70	3.3	163.636
152	1	descent	0.0259128	11	27338	70	70	70	3.66667	150
152	1	descent	0.0287397	12	27350	70	70	70	4.06667	150
152	1	descent	0.0315665	13	27362	70	70	70	4.46667	138.462
152	1	descent	0.034629	14	27375	70	70	70	4.9	150
152	1	descent	0.0374558	15	27387	75	70	72.5	5.3	150
152	1	descent	0.0402827	16	27399	70	70	70	5.7	138.462
152	1	descent	0.0433451	17	27412	70	70	70	6.13333	138.462
152	1	descent	0.0464075	18	27425	70	70	70	6.56667	150
152	1	descent	0.0492344	19	27437	70	70	70	6.96667	138.462
152	1	descent	0.0522968	20	27450	70	75	72.5	7.4	138.462
152	1	descent	0.0553592	21	27463	70	70	70	7.83333	138.462
152	1	descent	0.0584217	22	27476	70	70	70	8.26667	138.462
152	1	descent	0.0614841	23	27489	70	70	70	8.7	150
152	1	descent	0.064311	24	27501	70	70	70	9.1	128.571
152	1	descent	0.067609	25	27515	75	75	75	9.56667	150
152	1	descent	0.0704358	26	27527	70	75	72.5	9.96667	138.462
152	1	descent	0.0734982	27	27540	80	70	75	10.4	138.462
152	1	descent	0.0765607	28	27553	70	65	67.5	10.8333	128.571
152	1	descent	0.0798587	29	27567	70	65	67.5	11.3	138.462
152	1	descent	0.0829211	30	27580	70	70	70	11.7333	138.462
152	1	descent	0.0859835	31	27593	75	65	70	12.1667	138.462
152	1	descent	0.0890459	32	27606	75	65	70	12.6	138.462
152	1	descent	0.0921084	33	27619	75	65	70	13.0333	138.462
152	1	descent	0.0951708	34	27632	75	70	72.5	13.4667	128.571
152	1	descent	0.0984688	35	27646	70	70	70	13.9333	138.462
152	1	descent	0.101531	36	27659	70	70	70	14.3667	128.571
152	1	descent	0.104829	37	27673	70	75	72.5	14.8333	128.571
152	1	descent	0.108127	38	27687	65	70	67.5	15.3	128.571
152	1	descent	0.111425	39	27701	75	70	72.5	15.7667	128.571
152	1	descent	0.114723	40	27715	70	65	67.5	16.2333	128.571
152	1	descent	0.118021	41	27729	65	65	65	16.7	138.462
152	1	descent	0.121084	42	27742	70	65	67.5	17.1333	128.571
152	1	descent	0.124382	43	27756	70	65	67.5	17.6	128.571
152	1	descent	0.12768	44	27770	70	65	67.5	18.0667	128.571
152	1	descent	0.130978	45	27784	70	65	67.5	18.5333	138.462
152	1	descent	0.13404	46	27797	70	70	70	18.9667	120
152	1	descent	0.137574	47	27812	70	70	70	19.4667	128.571
152	1	descent	0.140872	48	27826	65	70	67.5	19.9333	138.462
152	1	descent	0.143934	49	27839	70	70	70	20.3667	128.571
152	1	descent	0.147232	50	27853	70	65	67.5	20.8333	128.571
152	1	descent	0.15053	51	27867	60	65	62.5	21.3	128.571
152	1	descent	0.153828	52	27881	70	60	65	21.7667	138.462
152	1	descent	0.15689	53	27894	70	60	65	22.2	128.571
152	1	descent	0.160188	54	27908	70	70	70	22.6667	128.571
152	1	descent	0.163486	55	27922	70	70	70	23.1333	128.571
152	1	descent	0.166784	56	27936	60	60	60	23.6	138.462
152	1	descent	0.169847	57	27949	60	60	60	24.0333	128.571
152	1	descent	0.173145	58	27963	65	65	65	24.5	128.571
152	1	descent	0.176443	59	27977	65	65	65	24.9667	128.571
152	1	descent	0.179741	60	27991	65	60	62.5	25.4333	138.462
152	1	descent	0.182803	61	28004	65	60	62.5	25.8667	120
152	1	descent	0.186337	62	28019	65	60	62.5	26.3667	138.462
152	1	descent	0.189399	63	28032	65	70	67.5	26.8	120
152	1	descent	0.192933	64	28047	65	65	65	27.3	138.462
152	1	descent	0.195995	65	28060	60	50	55	27.7333	120
152	1	descent	0.199529	66	28075	60	55	57.5	28.2333	120
152	1	descent	0.203062	67	28090	60	60	60	28.7333	128.571
152	1	descent	0.20636	68	28104	60	50	55	29.2	120
152	1	descent	0.209894	69	28119	40	55	47.5	29.7	105.882
152	1	descent	0.213899	70	28136	70	50	60	30.2667	112.5
152	1	descent	0.217668	71	28152	60	60	60	30.8	120
152	1	descent	0.221201	72	28167	55	55	55	31.3	112.5
152	1	descent	0.224971	73	28183	60	60	60	31.8333	100
152	1	descent	0.229211	74	28201	50	50	50	32.4333	60
152	1	bottom	0.236278	1	28231		50	50	33.4333	138.462
152	1	bottom	0.23934	2	28244		50	50	33.8667	128.571
152	1	bottom	0.242638	3	28258	40	45	42.5	34.3333	138.462
152	1	bottom	0.245701	4	28271	45	45	45	34.7667	75
152	1	bottom	0.251355	5	28295		40	40	35.5667	128.571
152	1	bottom	0.254653	6	28309		40	40	36.0333	128.571
152	1	bottom	0.257951	7	28323		30	30	36.5	150
152	1	bottom	0.260777	8	28335	45	50	47.5	36.9	150
152	1	bottom	0.263604	9	28347	45	45	45	37.3	85.7143
152	1	bottom	0.268551	10	28368		45	45	38	150
152	1	bottom	0.271378	11	28380		40	40	38.4	150
152	1	bottom	0.274205	12	28392	45	35	40	38.8	69.2308
152	1	bottom	0.28033	13	28418	40	35	37.5	39.6667	150
152	1	bottom	0.283157	14	28430	40	45	42.5	40.0667	138.462
152	1	bottom	0.286219	15	28443		40	40	40.5	150
152	1	bottom	0.289046	16	28455	30	40	35	40.9	163.636
152	1	bottom	0.291637	17	28466	30	40	35	41.2667	72
152	1	bottom	0.297527	18	28491	50	50	50	42.1	150
152	1	bottom	0.300353	19	28503	40	40	40	42.5	90
152	1	bottom	0.305065	20	28523		50	50	43.1667	163.636
152	1	bottom	0.307656	21	28534	50	35	42.5	43.5333	163.636
152	1	bottom	0.310247	22	28545	40	45	42.5	43.9	163.636
152	1	bottom	0.312839	23	28556	50	30	40	44.2667	163.636
152	1	bottom	0.31543	24	28567	45	40	42.5	44.6333	150
152	1	bottom	0.318257	25	28579		40	40	45.0333	138.462
152	1	bottom	0.321319	26	28592	45	45	45	45.4667	163.636
152	1	bottom	0.32391	27	28603	45	45	45	45.8333	72
152	1	bottom	0.3298	28	28628	50	45	47.5	46.6667	150
152	1	bottom	0.332627	29	28640	50	45	47.5	47.0667	128.571
152	1	bottom	0.335925	30	28654	45	50	47.5	47.5333	138.462
152	1	bottom	0.338987	31	28667	50	45	47.5	47.9667	128.571
152	1	bottom	0.342285	32	28681	50	45	47.5	48.4333	138.462
152	1	bottom	0.345347	33	28694		45	45	48.8667	138.462
152	1	bottom	0.34841	34	28707		50	50	49.3	150
152	1	bottom	0.351237	35	28719	50	45	47.5	49.7	69.2308
152	1	bottom	0.357362	36	28745	50	50	50	50.5667	163.636
152	1	bottom	0.359953	37	28756	50	45	47.5	50.9333	180
152	1	bottom	0.362309	38	28766	45	40	42.5	51.2667	163.636
152	1	bottom	0.3649	39	28777	40	35	37.5	51.6333	150
152	1	bottom	0.367727	40	28789		45	45	52.0333	163.636
152	1	bottom	0.370318	41	28800	25	30	27.5	52.4	128.571
152	1	bottom	0.373616	42	28814		40	40	52.8667	150
152	1	bottom	0.376443	43	28826	50	40	45	53.2667	150
152	1	bottom	0.37927	44	28838	45	50	47.5	53.6667	180
152	1	bottom	0.381625	45	28848	30	40	35	54	62.069
152	1	bottom	0.388457	46	28877		40	40	54.9667	180
152	1	bottom	0.390813	47	28887	35	40	37.5	55.3	66.6667
152	1	bottom	0.397173	48	28914	35	40	37.5	56.2	150
152	1	bottom	0.4	49	28926	40	40	40	56.6	138.462
152	1	bottom	0.403062	50	28939	40	40	40	57.0333	163.636
152	1	bottom	0.405654	51	28950	40	45	42.5	57.4	163.636
152	1	bottom	0.408245	52	28961	25	30	27.5	57.7667	128.571
152	1	bottom	0.411543	53	28975	30	40	35	58.2333	163.636
152	1	bottom	0.414134	54	28986	45	45	45	58.6	163.636
152	1	bottom	0.416726	55	28997	40	45	42.5	58.9667	163.636
152	1	bottom	0.419317	56	29008	30	40	35	59.3333	163.636
152	1	bottom	0.421908	57	29019	30	35	32.5	59.7	128.571
152	1	bottom	0.425206	58	29033	45	40	42.5	60.1667	138.462
152	1	bottom	0.428269	59	29046	45	50	47.5	60.6	163.636
152	1	bottom	0.43086	60	29057		40	40	60.9667	138.462
152	1	bottom	0.433922	61	29070		35	35	61.4	138.462
152	1	bottom	0.436985	62	29083	45	45	45	61.8333	163.636
152	1	bottom	0.439576	63	29094	35	40	37.5	62.2	150
152	1	bottom	0.442403	64	29106		50	50	62.6	150
152	1	bottom	0.44523	65	29118	40	40	40	63	150
152	1	bottom	0.448057	66	29130		35	35	63.4	163.636
152	1	bottom	0.450648	67	29141	35	40	37.5	63.7667	163.636
152	1	bottom	0.453239	68	29152	30	35	32.5	64.1333	72
152	1	bottom	0.459128	69	29177	45	55	50	64.9667	163.636
152	1	bottom	0.46172	70	29188	45	50	47.5	65.3333	138.462
152	1	bottom	0.464782	71	29201	40	45	42.5	65.7667	150
152	1	bottom	0.467609	72	29213	40	40	40	66.1667	150
152	1	bottom	0.470436	73	29225	30	40	35	66.5667	138.462
152	1	bottom	0.473498	74	29238	30	50	40	67	150
152	1	bottom	0.476325	75	29250		40	40	67.4	150
152	1	bottom	0.479152	76	29262		45	45	67.8	150
152	1	bottom	0.481979	77	29274	55	45	50	68.2	163.636
152	1	bottom	0.48457	78	29285		40	40	68.5667	150
152	1	bottom	0.487397	79	29297	55	50	52.5	68.9667	180
152	1	bottom	0.489753	80	29307	35	40	37.5	69.3	105.882
152	1	bottom	0.493757	81	29324	45	40	42.5	69.8667	163.636
152	1	bottom	0.496349	82	29335	45	45	45	70.2333	150
152	1	bottom	0.499176	83	29347	40	50	45	70.6333	150
152	1	bottom	0.502002	84	29359	45	45	45	71.0333	163.636
152	1	bottom	0.504594	85	29370	30	35	32.5	71.4	150
152	1	bottom	0.50742	86	29382	40	40	40	71.8	180
152	1	bottom	0.509776	87	29392	40	50	45	72.1333	180
152	1	bottom	0.512132	88	29402	45	40	42.5	72.4667	180
152	1	bottom	0.514488	89	29412	35	49	42	72.8	163.636
152	1	bottom	0.517079	90	29423		40	40	73.1667	163.636
152	1	bottom	0.51967	91	29434	40	45	42.5	73.5333	150
152	1	bottom	0.522497	92	29446	40	35	37.5	73.9333	120
152	1	bottom	0.526031	93	29461		45	45	74.4333	163.636
152	1	bottom	0.528622	94	29472	50	50	50	74.8	138.462
152	1	bottom	0.531684	95	29485	35	35	35	75.2333	128.571
152	1	bottom	0.534982	96	29499	45	45	45	75.7	163.636
152	1	bottom	0.537574	97	29510	55	45	50	76.0667	100
152	1	bottom	0.541814	98	29528		45	45	76.6667	163.636
152	1	bottom	0.544405	99	29539	65	50	57.5	77.0333	180
152	1	bottom	0.546761	100	29549		15	15	77.3667	39.1304
152	1	bottom	0.557597	101	29595	60	55	57.5	78.9	90
152	1	bottom	0.562309	102	29615	45	40	42.5	79.5667	90
152	1	bottom	0.56702	103	29635	55	35	45	80.2333	72
152	1	ascent	0.572909	1	29660	55		55	81.0667	22.7848
152	1	ascent	0.591519	2	29739	60	55	57.5	83.7	29.5082
152	1	ascent	0.605889	3	29800	55	50	52.5	85.7333	52.9412
152	1	ascent	0.613899	4	29834	55	55	55	86.8667	66.6667
152	1	ascent	0.620259	5	29861	55	50	52.5	87.7667	39.1304
152	1	ascent	0.631095	6	29907	60	50	55	89.3	31.0345
152	1	ascent	0.644759	7	29965	70	55	62.5	91.2333	22.5
152	1	ascent	0.663604	8	30045	65	50	57.5	93.9	27.2727
152	1	ascent	0.679152	9	30111	70	45	57.5	96.1	14.0625
152	1	ascent	0.709305	10	30239	55	45	50	100.367	13.1387
152	1	ascent	0.741578	11	30376		50	50	104.933	1.64084
152	1	ascent	1	12	31473				141.5
153	1	descent	0	1	32693	80	95	87.5	0	180
153	1	descent	0.00252207	2	32703	70	65	67.5	0.333333	163.636
153	1	descent	0.00529634	3	32714	75	75	75	0.7	180
153	1	descent	0.00781841	4	32724	70	70	70	1.03333	163.636
153	1	descent	0.0105927	5	32735	75	70	72.5	1.4	180
153	1	descent	0.0131148	6	32745	70	65	67.5	1.73333	163.636
153	1	descent	0.015889	7	32756	75	75	75	2.1	163.636
153	1	descent	0.0186633	8	32767	80	80	80	2.46667	163.636
153	1	descent	0.0214376	9	32778	75	70	72.5	2.83333	163.636
153	1	descent	0.0242119	10	32789	70	70	70	3.2	150
153	1	descent	0.0272383	11	32801	75	75	75	3.6	150
153	1	descent	0.0302648	12	32813	70	75	72.5	4	163.636
153	1	descent	0.0330391	13	32824	70	70	70	4.36667	150
153	1	descent	0.0360656	14	32836	70	75	72.5	4.76667	150
153	1	descent	0.0390921	15	32848	70	70	70	5.16667	150
153	1	descent	0.0421185	16	32860	70	75	72.5	5.56667	150
153	1	descent	0.045145	17	32872	70	75	72.5	5.96667	138.462
153	1	descent	0.0484237	18	32885	70	75	72.5	6.4	138.462
153	1	descent	0.0517024	19	32898	70	75	72.5	6.83333	150
153	1	descent	0.0547289	20	32910	70	70	70	7.23333	138.462
153	1	descent	0.0580076	21	32923	70	70	70	7.66667	150
153	1	descent	0.061034	22	32935	65	70	67.5	8.06667	138.462
153	1	descent	0.0643127	23	32948	70	70	70	8.5	138.462
153	1	descent	0.0675914	24	32961	75	70	72.5	8.93333	138.462
153	1	descent	0.0708701	25	32974	75	70	72.5	9.36667	138.462
153	1	descent	0.0741488	26	32987	70	65	67.5	9.8	150
153	1	descent	0.0771753	27	32999	60	60	60	10.2	138.462
153	1	descent	0.080454	28	33012	65	65	65	10.6333	138.462
153	1	descent	0.0837327	29	33025	70	65	67.5	11.0667	150
153	1	descent	0.0867591	30	33037	65	65	65	11.4667	138.462
153	1	descent	0.0900378	31	33050	65	65	65	11.9	128.571
153	1	descent	0.0935687	32	33064	70	65	67.5	12.3667	138.462
153	1	descent	0.0968474	33	33077	65	65	65	12.8	138.462
153	1	descent	0.100126	34	33090	70	65	67.5	13.2333	128.571
153	1	descent	0.103657	35	33104	70	65	67.5	13.7	138.462
153	1	descent	0.106936	36	33117	70	65	67.5	14.1333	138.462
153	1	descent	0.110214	37	33130	65	60	62.5	14.5667	128.571
153	1	descent	0.113745	38	33144	65	60	62.5	15.0333	138.462
153	1	descent	0.117024	39	33157	65	65	65	15.4667	138.462
153	1	descent	0.120303	40	33170	60	65	62.5	15.9	128.571
153	1	descent	0.123834	41	33184	60	65	62.5	16.3667	138.462
153	1	descent	0.127112	42	33197	60	65	62.5	16.8	138.462
153	1	descent	0.130391	43	33210	60	55	57.5	17.2333	128.571
153	1	descent	0.133922	44	33224	60	65	62.5	17.7	138.462
153	1	descent	0.137201	45	33237	60	60	60	18.1333	128.571
153	1	descent	0.140731	46	33251	65	60	62.5	18.6	128.571
153	1	descent	0.144262	47	33265	65	60	62.5	19.0667	128.571
153	1	descent	0.147793	48	33279	65	60	62.5	19.5333	150
153	1	descent	0.15082	49	33291	65	60	62.5	19.9333	128.571
153	1	descent	0.154351	50	33305	70	60	65	20.4	138.462
153	1	descent	0.157629	51	33318	65	60	62.5	20.8333	128.571
153	1	descent	0.16116	52	33332	65	65	65	21.3	138.462
153	1	descent	0.164439	53	33345	55	55	55	21.7333	128.571
153	1	descent	0.16797	54	33359	60	60	60	22.2	138.462
153	1	descent	0.171248	55	33372	55	60	57.5	22.6333	128.571
153	1	descent	0.174779	56	33386	60	60	60	23.1	128.571
153	1	descent	0.17831	57	33400	60	55	57.5	23.5667	138.462
153	1	descent	0.181589	58	33413	60	55	57.5	24	128.571
153	1	descent	0.18512	59	33427	65	60	62.5	24.4667	138.462
153	1	descent	0.188398	60	33440	60	50	55	24.9	128.571
153	1	descent	0.191929	61	33454	65	55	60	25.3667	128.571
153	1	descent	0.19546	62	33468	60	60	60	25.8333	128.571
153	1	descent	0.198991	63	33482	60	65	62.5	26.3	112.5
153	1	descent	0.203026	64	33498	60	60	60	26.8333	128.571
153	1	descent	0.206557	65	33512	60	55	57.5	27.3	120
153	1	descent	0.21034	66	33527	60	40	50	27.8	120
153	1	descent	0.214124	67	33542	45	40	42.5	28.3	120
153	1	descent	0.217907	68	33557	65	60	62.5	28.8	120
153	1	descent	0.22169	69	33572	60	60	60	29.3	112.5
153	1	descent	0.225725	70	33588	50	55	52.5	29.8333	112.5
153	1	descent	0.22976	71	33604	60	55	57.5	30.3667	100
153	1	descent	0.2343	72	33622	65	60	62.5	30.9667	100
153	1	descent	0.23884	73	33640	50	55	52.5	31.5667	138.462
153	1	descent	0.242119	74	33653	45	45	45	32	100
153	1	descent	0.246658	75	33671	55	55	55	32.6	128.571
153	1	descent	0.250189	76	33685	50	55	52.5	33.0667	90
153	1	bottom	0.255233	1	33705	50	55	52.5	33.7333	138.462
153	1	bottom	0.258512	2	33718	45	50	47.5	34.1667	138.462
153	1	bottom	0.261791	3	33731	45	40	42.5	34.6	64.2857
153	1	bottom	0.268852	4	33759	40	40	40	35.5333	150
153	1	bottom	0.271879	5	33771	45	50	47.5	35.9333	150
153	1	bottom	0.274905	6	33783		35	35	36.3333	150
153	1	bottom	0.277932	7	33795	45	40	42.5	36.7333	78.2609
153	1	bottom	0.283733	8	33818	50	45	47.5	37.5	138.462
153	1	bottom	0.287011	9	33831	50	50	50	37.9333	138.462
153	1	bottom	0.29029	10	33844	40	45	42.5	38.3667	72
153	1	bottom	0.296595	11	33869	45	45	45	39.2	150
153	1	bottom	0.299622	12	33881		40	40	39.6	150
153	1	bottom	0.302648	13	33893	40	40	40	40	58.0645
153	1	bottom	0.310467	14	33924	40	40	40	41.0333	150
153	1	bottom	0.313493	15	33936	45	50	47.5	41.4333	150
153	1	bottom	0.31652	16	33948	50	45	47.5	41.8333	150
153	1	bottom	0.319546	17	33960		35	35	42.2333	112.5
153	1	bottom	0.323581	18	33976	35		35	42.7667	180
153	1	bottom	0.326103	19	33986	50	45	47.5	43.1	225
153	1	bottom	0.328121	20	33994	45	45	45	43.3667	225
153	1	bottom	0.330139	21	34002	35	40	37.5	43.6333	225
153	1	bottom	0.332156	22	34010	35	35	35	43.9	225
153	1	bottom	0.334174	23	34018	40	35	37.5	44.1667	200
153	1	bottom	0.336444	24	34027	40	40	40	44.4667	200
153	1	bottom	0.338714	25	34036		35	35	44.7667	180
153	1	bottom	0.341236	26	34046	45	40	42.5	45.1	257.143
153	1	bottom	0.343001	27	34053	50	45	47.5	45.3333	225
153	1	bottom	0.345019	28	34061	45	40	42.5	45.6	225
153	1	bottom	0.347037	29	34069	40	30	35	45.8667	200
153	1	bottom	0.349306	30	34078		30	30	46.1667	2.6087	prey captured
153	1	bottom	0.523329	31	34768				69.1667	128.571	end of prey capture
153	1	ascent	0.52686	1	34782		55	55	69.6333	100
153	1	ascent	0.5314	2	34800	70		70	70.2333	120
153	1	ascent	0.535183	3	34815	55		55	70.7333	128.571
153	1	ascent	0.538714	4	34829		55	55	71.2	180
153	1	ascent	0.541236	5	34839		65	65	71.5333	163.636
153	1	ascent	0.54401	6	34850	75	65	70	71.9	138.462
153	1	ascent	0.547289	7	34863	65	30	47.5	72.3333	64.2857
153	1	ascent	0.554351	8	34891	65	45	55	73.2667	46.1538
153	1	ascent	0.564187	9	34930	55	35	45	74.5667	45
153	1	ascent	0.574275	10	34970	65	50	57.5	75.9	33.9623
153	1	ascent	0.587642	11	35023	70	45	57.5	77.6667	38.2979
153	1	ascent	0.599496	12	35070		50	50	79.2333	56.25
153	1	ascent	0.607566	13	35102	65	45	55	80.3	40
153	1	ascent	0.618916	14	35147	65	55	60	81.8	24.6575
153	1	ascent	0.637327	15	35220	60	55	57.5	84.2333	36
153	1	ascent	0.649937	16	35270	60	50	55	85.9	36
153	1	ascent	0.662547	17	35320	60	55	57.5	87.5667	30.5085
153	1	ascent	0.677427	18	35379	65	60	62.5	89.5333	32.7273
153	1	ascent	0.691299	19	35434	45	60	52.5	91.3667	25
153	1	ascent	0.709458	20	35506		55	55	93.7667	23.0769
153	1	ascent	0.72913	21	35584	65	45	55	96.3667	10.2273
153	1	ascent	0.773518	22	35760	65	40	52.5	102.233	2.00445
153	1	ascent	1	23	36658				132.167		end of dive
180	1	descent	0	1	160480	75	70	72.5	0	163.636
180	1	descent	0.00275966	2	160491	60	75	67.5	0.366667	180
180	1	descent	0.00526844	3	160501	75	70	72.5	0.7	163.636
180	1	descent	0.0080281	4	160512	75	75	75	1.06667	180
180	1	descent	0.0105369	5	160522	75	70	72.5	1.4	163.636
180	1	descent	0.0132965	6	160533	75	70	72.5	1.76667	163.636
180	1	descent	0.0160562	7	160544	75	70	72.5	2.13333	163.636
180	1	descent	0.0188159	8	160555	75	75	75	2.5	163.636
180	1	descent	0.0215755	9	160566	75	70	72.5	2.86667	163.636
180	1	descent	0.0243352	10	160577	75	70	72.5	3.23333	150
180	1	descent	0.0273457	11	160589	70	75	72.5	3.63333	163.636
180	1	descent	0.0301054	12	160600	70	70	70	4	150
180	1	descent	0.0331159	13	160612	70	75	72.5	4.4	150
180	1	descent	0.0361264	14	160624	65	75	70	4.8	150
180	1	descent	0.039137	15	160636	60	70	65	5.2	150
180	1	descent	0.0421475	16	160648	65	70	67.5	5.6	138.462
180	1	descent	0.0454089	17	160661	75	75	75	6.03333	150
180	1	descent	0.0484195	18	160673	70	75	72.5	6.43333	138.462
180	1	descent	0.0516809	19	160686	75	70	72.5	6.86667	150
180	1	descent	0.0546914	20	160698	70	70	70	7.26667	150
180	1	descent	0.057702	21	160710	65	65	65	7.66667	138.462
180	1	descent	0.0609634	22	160723	70	75	72.5	8.1	138.462
180	1	descent	0.0642248	23	160736	70	70	70	8.53333	150
180	1	descent	0.0672353	24	160748	70	65	67.5	8.93333	138.462
180	1	descent	0.0704967	25	160761	65	60	62.5	9.36667	138.462
180	1	descent	0.0737582	26	160774	75	70	72.5	9.8	138.462
180	1	descent	0.0770196	27	160787	75	65	70	10.2333	138.462
180	1	descent	0.080281	28	160800	70	65	67.5	10.6667	138.462
180	1	descent	0.0835424	29	160813	65	65	65	11.1	138.462
180	1	descent	0.0868038	30	160826	65	60	62.5	11.5333	138.462
180	1	descent	0.0900652	31	160839	75	60	67.5	11.9667	138.462
180	1	descent	0.0933266	32	160852	65	60	62.5	12.4	128.571
180	1	descent	0.0968389	33	160866	65	60	62.5	12.8667	138.462
180	1	descent	0.1001	34	160879	65	60	62.5	13.3	138.462
180	1	descent	0.103362	35	160892	65	65	65	13.7333	138.462
180	1	descent	0.106623	36	160905	60	60	60	14.1667	150
180	1	descent	0.109634	37	160917	60	65	62.5	14.5667	138.462
180	1	descent	0.112895	38	160930	60	65	62.5	15	128.571
180	1	descent	0.116407	39	160944	65	60	62.5	15.4667	138.462
180	1	descent	0.119669	40	160957	60	65	62.5	15.9	138.462
180	1	descent	0.12293	41	160970	65	60	62.5	16.3333	138.462
180	1	descent	0.126192	42	160983	65	60	62.5	16.7667	138.462
180	1	descent	0.129453	43	160996	55	65	60	17.2	150
180	1	descent	0.132464	44	161008	70	60	65	17.6	138.462
180	1	descent	0.135725	45	161021	65	55	60	18.0333	128.571
180	1	descent	0.139237	46	161035	65	60	62.5	18.5	138.462
180	1	descent	0.142499	47	161048	65	65	65	18.9333	128.571
180	1	descent	0.146011	48	161062	65	60	62.5	19.4	138.462
180	1	descent	0.149272	49	161075	60	60	60	19.8333	138.462
180	1	descent	0.152534	50	161088	65	55	60	20.2667	138.462
180	1	descent	0.155795	51	161101	65	55	60	20.7	128.571
180	1	descent	0.159308	52	161115	60	60	60	21.1667	138.462
180	1	descent	0.162569	53	161128	55	60	57.5	21.6	120
180	1	descent	0.166332	54	161143	60	60	60	22.1	128.571
180	1	descent	0.169844	55	161157	65	60	62.5	22.5667	128.571
180	1	descent	0.173357	56	161171	65	60	62.5	23.0333	138.462
180	1	descent	0.176618	57	161184	60	60	60	23.4667	138.462
180	1	descent	0.17988	58	161197	60	60	60	23.9	128.571
180	1	descent	0.183392	59	161211	65	60	62.5	24.3667	138.462
180	1	descent	0.186653	60	161224	60	65	62.5	24.8	128.571
180	1	descent	0.190166	61	161238	45	55	50	25.2667	138.462
180	1	descent	0.193427	62	161251	60	55	57.5	25.7	138.462
180	1	descent	0.196688	63	161264	60	55	57.5	26.1333	128.571
180	1	descent	0.200201	64	161278	60	55	57.5	26.6	112.5
180	1	descent	0.204215	65	161294	55	55	55	27.1333	138.462
180	1	descent	0.207476	66	161307	60	55	57.5	27.5667	100
180	1	descent	0.211992	67	161325	60	55	57.5	28.1667	138.462
180	1	descent	0.215253	68	161338	55	50	52.5	28.6	128.571
180	1	bottom	0.218766	1	161352	50	50	50	29.0667	150
180	1	bottom	0.221776	2	161364		50	50	29.4667	138.462
180	1	bottom	0.225038	3	161377		45	45	29.9	163.636
180	1	bottom	0.227797	4	161388	45	40	42.5	30.2667	150
180	1	bottom	0.230808	5	161400		45	45	30.6667	150
180	1	bottom	0.233818	6	161412		40	40	31.0667	128.571
180	1	bottom	0.237331	7	161426		45	45	31.5333	150
180	1	bottom	0.240341	8	161438		45	45	31.9333	150
180	1	bottom	0.243352	9	161450	45	45	45	32.3333	138.462
180	1	bottom	0.246613	10	161463		50	50	32.7667	150
180	1	bottom	0.249624	11	161475	45	40	42.5	33.1667	163.636
180	1	bottom	0.252383	12	161486	40	45	42.5	33.5333	150
180	1	bottom	0.255394	13	161498	35	45	40	33.9333	120
180	1	bottom	0.259157	14	161513	40	50	45	34.4333	94.7368
180	1	bottom	0.263924	15	161532		35	35	35.0667	163.636
180	1	bottom	0.266683	16	161543	55	50	52.5	35.4333	163.636
180	1	bottom	0.269443	17	161554	45	45	45	35.8	163.636
180	1	bottom	0.272203	18	161565		45	45	36.1667	41.8605
180	1	bottom	0.28299	19	161608	50	50	50	37.6	64.2857
180	1	bottom	0.290015	20	161636	55	55	55	38.5333	150
180	1	bottom	0.293026	21	161648	50	50	50	38.9333	163.636
180	1	bottom	0.295785	22	161659	40	40	40	39.3	163.636
180	1	bottom	0.298545	23	161670	40	45	42.5	39.6667	163.636
180	1	bottom	0.301305	24	161681	40	45	42.5	40.0333	150
180	1	bottom	0.304315	25	161693		40	40	40.4333	163.636
180	1	bottom	0.307075	26	161704		45	45	40.8	163.636
180	1	bottom	0.309834	27	161715	45	45	45	41.1667	128.571
180	1	bottom	0.313347	28	161729	45	50	47.5	41.6333	150
180	1	bottom	0.316357	29	161741	35	45	40	42.0333	150
180	1	bottom	0.319368	30	161753	50	45	47.5	42.4333	150
180	1	bottom	0.322378	31	161765	50	50	50	42.8333	163.636
180	1	bottom	0.325138	32	161776	45	40	42.5	43.2	150
180	1	bottom	0.328149	33	161788		45	45	43.6	105.882
180	1	bottom	0.332413	34	161805	50	45	47.5	44.1667	150
180	1	bottom	0.335424	35	161817	50	50	50	44.5667	163.636
180	1	bottom	0.338184	36	161828	30	35	32.5	44.9333	163.636
180	1	bottom	0.340943	37	161839	35	35	35	45.3	150
180	1	bottom	0.343954	38	161851		40	40	45.7	150
180	1	bottom	0.346964	39	161863	45	40	42.5	46.1	163.636
180	1	bottom	0.349724	40	161874	35	55	45	46.4667	150
180	1	bottom	0.352735	41	161886		45	45	46.8667	150
180	1	bottom	0.355745	42	161898		45	45	47.2667	163.636
180	1	bottom	0.358505	43	161909	50	45	47.5	47.6333	163.636
180	1	bottom	0.361264	44	161920	35	30	32.5	48	150
180	1	bottom	0.364275	45	161932		40	40	48.4	163.636
180	1	bottom	0.367035	46	161943	45	40	42.5	48.7667	150
180	1	bottom	0.370045	47	161955	40	40	40	49.1667	163.636
180	1	bottom	0.372805	48	161966	35	45	40	49.5333	180
180	1	bottom	0.375314	49	161976	50	45	47.5	49.8667	150
180	1	bottom	0.378324	50	161988	45	45	45	50.2667	78.2609
180	1	bottom	0.384094	51	162011	55	50	52.5	51.0333	163.636
180	1	bottom	0.386854	52	162022	50	50	50	51.4	163.636
180	1	bottom	0.389614	53	162033	35	40	37.5	51.7667	150
180	1	bottom	0.392624	54	162045		40	40	52.1667	163.636
180	1	bottom	0.395384	55	162056	40	45	42.5	52.5333	120
180	1	bottom	0.399147	56	162071		45	45	53.0333	150
180	1	bottom	0.402158	57	162083		45	45	53.4333	163.636
180	1	bottom	0.404917	58	162094	45	40	42.5	53.8	138.462
180	1	bottom	0.408179	59	162107		45	45	54.2333	78.2609
180	1	bottom	0.413949	60	162130	50	55	52.5	55	150
180	1	bottom	0.416959	61	162142	55	50	52.5	55.4	163.636
180	1	bottom	0.419719	62	162153	45	50	47.5	55.7667	163.636
180	1	bottom	0.422479	63	162164		40	40	56.1333	120
180	1	bottom	0.426242	64	162179	40	40	40	56.6333	163.636
180	1	bottom	0.429002	65	162190	45	50	47.5	57	163.636
180	1	bottom	0.431761	66	162201	35	40	37.5	57.3667	163.636
180	1	bottom	0.434521	67	162212		40	40	57.7333	128.571
180	1	bottom	0.438033	68	162226		30	30	58.2	163.636
180	1	bottom	0.440793	69	162237		40	40	58.5667	120
180	1	bottom	0.444556	70	162252	45	45	45	59.0667	150
180	1	bottom	0.447566	71	162264	45	50	47.5	59.4667	138.462
180	1	bottom	0.450828	72	162277	50	50	50	59.9	150
180	1	bottom	0.453838	73	162289	45	45	45	60.3	150
180	1	bottom	0.456849	74	162301		45	45	60.7	163.636
180	1	bottom	0.459609	75	162312	45	45	45	61.0667	138.462
180	1	bottom	0.46287	76	162325	50	45	47.5	61.5	120
180	1	bottom	0.466633	77	162340		50	50	62	150
180	1	bottom	0.469644	78	162352	45	40	42.5	62.4	163.636
180	1	bottom	0.472403	79	162363	50	45	47.5	62.7667	163.636
180	1	bottom	0.475163	80	162374		40	40	63.1333	150
180	1	bottom	0.478174	81	162386		45	45	63.5333	163.636
180	1	bottom	0.480933	82	162397		45	45	63.9	150
180	1	bottom	0.483944	83	162409		40	40	64.3	138.462
180	1	bottom	0.487205	84	162422	50	45	47.5	64.7333	150
180	1	bottom	0.490216	85	162434	45	55	50	65.1333	150
180	1	bottom	0.493226	86	162446	40	50	45	65.5333	163.636
180	1	bottom	0.495986	87	162457		45	45	65.9	163.636
180	1	bottom	0.498746	88	162468	45	40	42.5	66.2667	58.0645
180	1	bottom	0.506523	89	162499	40	45	42.5	67.3	163.636
180	1	bottom	0.509282	90	162510	35	45	40	67.6667	112.5
180	1	bottom	0.513297	91	162526	55	50	52.5	68.2	150
180	1	bottom	0.516307	92	162538	45	40	42.5	68.6	163.636
180	1	bottom	0.519067	93	162549	40	35	37.5	68.9667	180
180	1	bottom	0.521576	94	162559	30	45	37.5	69.3	180
180	1	bottom	0.524084	95	162569	45	50	47.5	69.6333	150
180	1	bottom	0.527095	96	162581		35	35	70.0333	180
180	1	bottom	0.529604	97	162591	35	40	37.5	70.3667	163.636
180	1	bottom	0.532363	98	162602		40	40	70.7333	200
180	1	bottom	0.534621	99	162611	45	40	42.5	71.0333	163.636
180	1	bottom	0.537381	100	162622	45	40	42.5	71.4	163.636
180	1	bottom	0.54014	101	162633		40	40	71.7667	150
180	1	bottom	0.543151	102	162645	45	40	42.5	72.1667	150
180	1	bottom	0.546162	103	162657	45	40	42.5	72.5667	163.636
180	1	bottom	0.548921	104	162668	40	40	40	72.9333	180
180	1	bottom	0.55143	105	162678	40	40	40	73.2667	150
180	1	bottom	0.554441	106	162690		35	35	73.6667	200
180	1	bottom	0.556698	107	162699	45	35	40	73.9667	200
180	1	bottom	0.558956	108	162708	45	50	47.5	74.2667	200
180	1	bottom	0.561214	109	162717	40	40	40	74.5667	200
180	1	bottom	0.563472	110	162726	45	40	42.5	74.8667	180
180	1	bottom	0.565981	111	162736	45	40	42.5	75.2	180
180	1	bottom	0.56849	112	162746	35	40	37.5	75.5333	200
180	1	bottom	0.570748	113	162755		40	40	75.8333	163.636
180	1	bottom	0.573507	114	162766	40	45	42.5	76.2	200
180	1	bottom	0.575765	115	162775		35	35	76.5	180
180	1	bottom	0.578274	116	162785		35	35	76.8333	163.636
180	1	bottom	0.581034	117	162796	40	45	42.5	77.2	180
180	1	bottom	0.583542	118	162806	40	40	40	77.5333	180
180	1	bottom	0.586051	119	162816	50	40	45	77.8667	81.8182
180	1	bottom	0.59157	120	162838	45	50	47.5	78.6	163.636
180	1	bottom	0.59433	121	162849	35	30	32.5	78.9667	163.636
180	1	bottom	0.59709	122	162860	35	40	37.5	79.3333	150
180	1	bottom	0.6001	123	162872	35	35	35	79.7333	150
180	1	bottom	0.603111	124	162884		50	50	80.1333	200
180	1	bottom	0.605369	125	162893	30	35	32.5	80.4333	163.636
180	1	bottom	0.608128	126	162904	35	45	40	80.8	163.636
180	1	bottom	0.610888	127	162915	50	45	47.5	81.1667	75
180	1	bottom	0.616909	128	162939	45	50	47.5	81.9667	128.571
180	1	bottom	0.620421	129	162953	55	45	50	82.4333	138.462
180	1	bottom	0.623683	130	162966	50	55	52.5	82.8667	150
180	1	bottom	0.626693	131	162978	50	45	47.5	83.2667	163.636
180	1	bottom	0.629453	132	162989	45	55	50	83.6333	180
180	1	bottom	0.631962	133	162999		40	40	83.9667	163.636
180	1	bottom	0.634722	134	163010	45	50	47.5	84.3333	128.571
180	1	bottom	0.638234	135	163024	45	40	42.5	84.8	150
180	1	bottom	0.641244	136	163036	40	50	45	85.2	150
180	1	bottom	0.644255	137	163048	45	55	50	85.6	163.636
180	1	bottom	0.647015	138	163059	50	50	50	85.9667	163.636
180	1	bottom	0.649774	139	163070	40	40	40	86.3333	150
180	1	bottom	0.652785	140	163082	35	40	37.5	86.7333	180
180	1	bottom	0.655294	141	163092	45	45	45	87.0667	180
180	1	bottom	0.657802	142	163102		45	45	87.4	150
180	1	bottom	0.660813	143	163114		40	40	87.8	163.636
180	1	bottom	0.663573	144	163125	40	45	42.5	88.1667	163.636
180	1	bottom	0.666332	145	163136	40	50	45	88.5333	75
180	1	bottom	0.672353	146	163160		40	40	89.3333	90
180	1	bottom	0.677371	147	163180		50	50	90	85.7143
180	1	ascent	0.682639	1	163201	45	60	52.5	90.7	90
180	1	ascent	0.687657	2	163221	50	55	52.5	91.3667	45
180	1	ascent	0.697692	3	163261	55	55	55	92.7	48.6486
180	1	ascent	0.706974	4	163298	55	60	57.5	93.9333	52.9412
180	1	ascent	0.715504	5	163332	60	55	57.5	95.0667	35.2941
180	1	ascent	0.728299	6	163383	60	55	57.5	96.7667	36.7347
180	1	ascent	0.740592	7	163432	55	55	55	98.4	46.1538
180	1	ascent	0.750376	8	163471	65	55	60	99.7	27.6923
180	1	ascent	0.766683	9	163536	60	55	57.5	101.867	24.6575
180	1	ascent	0.784997	10	163609	60	60	60	104.3	2.10035
180	1	ascent	1	11	164466				132.867		end of dive
156	1	descent	0	1	48008	70	70	70	0	180
156	1	descent	0.00254647	2	48018	75	70	72.5	0.333333	180
156	1	descent	0.00509295	3	48028	70	65	67.5	0.666667	163.636
156	1	descent	0.00789407	4	48039	75	75	75	1.03333	180
156	1	descent	0.0104405	5	48049	70	70	70	1.36667	163.636
156	1	descent	0.0132417	6	48060	70	70	70	1.73333	163.636
156	1	descent	0.0160428	7	48071	70	70	70	2.1	163.636
156	1	descent	0.0188439	8	48082	70	70	70	2.46667	163.636
156	1	descent	0.021645	9	48093	70	70	70	2.83333	150
156	1	descent	0.0247008	10	48105	70	70	70	3.23333	150
156	1	descent	0.0277566	11	48117	70	70	70	3.63333	163.636
156	1	descent	0.0305577	12	48128	65	70	67.5	4	150
156	1	descent	0.0336134	13	48140	70	70	70	4.4	150
156	1	descent	0.0366692	14	48152	70	70	70	4.8	150
156	1	descent	0.039725	15	48164	70	70	70	5.2	138.462
156	1	descent	0.0430354	16	48177	75	70	72.5	5.63333	150
156	1	descent	0.0460912	17	48189	75	70	72.5	6.03333	138.462
156	1	descent	0.0494016	18	48202	70	70	70	6.46667	150
156	1	descent	0.0524573	19	48214	70	70	70	6.86667	138.462
156	1	descent	0.0557678	20	48227	70	75	72.5	7.3	150
156	1	descent	0.0588235	21	48239	70	70	70	7.7	138.462
156	1	descent	0.0621339	22	48252	70	75	72.5	8.13333	138.462
156	1	descent	0.0654444	23	48265	70	70	70	8.56667	138.462
156	1	descent	0.0687548	24	48278	70	75	72.5	9	138.462
156	1	descent	0.0720652	25	48291	70	70	70	9.43333	150
156	1	descent	0.075121	26	48303	65	70	67.5	9.83333	138.462
156	1	descent	0.0784314	27	48316	65	70	67.5	10.2667	138.462
156	1	descent	0.0817418	28	48329	65	70	67.5	10.7	138.462
156	1	descent	0.0850522	29	48342	65	65	65	11.1333	120
156	1	descent	0.0888719	30	48357	70	65	67.5	11.6333	138.462
156	1	descent	0.0921823	31	48370	65	70	67.5	12.0667	138.462
156	1	descent	0.0954927	32	48383	70	65	67.5	12.5	138.462
156	1	descent	0.0988032	33	48396	70	60	65	12.9333	128.571
156	1	descent	0.102368	34	48410	75	65	70	13.4	138.462
156	1	descent	0.105679	35	48423	70	65	67.5	13.8333	128.571
156	1	descent	0.109244	36	48437	70	65	67.5	14.3	138.462
156	1	descent	0.112554	37	48450	70	65	67.5	14.7333	128.571
156	1	descent	0.116119	38	48464	65	65	65	15.2	138.462
156	1	descent	0.11943	39	48477	65	70	67.5	15.6333	128.571
156	1	descent	0.122995	40	48491	65	65	65	16.1	138.462
156	1	descent	0.126305	41	48504	65	65	65	16.5333	128.571
156	1	descent	0.12987	42	48518	65	65	65	17	128.571
156	1	descent	0.133435	43	48532	65	60	62.5	17.4667	138.462
156	1	descent	0.136746	44	48545	65	60	62.5	17.9	128.571
156	1	descent	0.140311	45	48559	70	65	67.5	18.3667	138.462
156	1	descent	0.143621	46	48572	70	65	67.5	18.8	128.571
156	1	descent	0.147186	47	48586	75	65	70	19.2667	138.462
156	1	descent	0.150497	48	48599	65	65	65	19.7	128.571
156	1	descent	0.154062	49	48613	65	65	65	20.1667	138.462
156	1	descent	0.157372	50	48626	60	65	62.5	20.6	128.571
156	1	descent	0.160937	51	48640	65	65	65	21.0667	138.462
156	1	descent	0.164248	52	48653	60	65	62.5	21.5	128.571
156	1	descent	0.167813	53	48667	60	60	60	21.9667	128.571
156	1	descent	0.171378	54	48681	60	60	60	22.4333	120
156	1	descent	0.175197	55	48696	65	60	62.5	22.9333	138.462
156	1	descent	0.178508	56	48709	70	65	67.5	23.3667	128.571
156	1	descent	0.182073	57	48723	65	65	65	23.8333	128.571
156	1	descent	0.185638	58	48737	55	60	57.5	24.3	128.571
156	1	descent	0.189203	59	48751	60	55	57.5	24.7667	128.571
156	1	descent	0.192768	60	48765	60	50	55	25.2333	128.571
156	1	descent	0.196333	61	48779	50	65	57.5	25.7	128.571
156	1	descent	0.199898	62	48793	65	60	62.5	26.1667	120
156	1	descent	0.203718	63	48808	50	60	55	26.6667	112.5
156	1	descent	0.207792	64	48824	55	60	57.5	27.2	128.571
156	1	descent	0.211357	65	48838	55	60	57.5	27.6667	100
156	1	descent	0.215941	66	48856	55	55	55	28.2667	120
156	1	descent	0.219761	67	48871	60	60	60	28.7667	120
156	1	descent	0.22358	68	48886	60	60	60	29.2667	128.571
156	1	bottom	0.227145	1	48900	65	60	62.5	29.7333	69.2308
156	1	bottom	0.233766	2	48926	35	40	37.5	30.6	105.882
156	1	bottom	0.238095	3	48943		45	45	31.1667	138.462
156	1	bottom	0.241406	4	48956	50	50	50	31.6	90
156	1	bottom	0.246499	5	48976	50	50	50	32.2667	138.462
156	1	bottom	0.249809	6	48989		45	45	32.7	60
156	1	bottom	0.257448	7	49019		40	40	33.7	112.5
156	1	bottom	0.261523	8	49035	45	50	47.5	34.2333	200
156	1	bottom	0.263815	9	49044	50	50	50	34.5333	75
156	1	bottom	0.269926	10	49068	65	50	57.5	35.3333	112.5
156	1	bottom	0.274001	11	49084	60	45	52.5	35.8667	64.2857
156	1	bottom	0.281131	12	49112	60	60	60	36.8	100
156	1	bottom	0.285714	13	49130		55	55	37.4	112.5
156	1	bottom	0.289789	14	49146	60	45	52.5	37.9333	62.069
156	1	bottom	0.297173	15	49175	60	45	52.5	38.9	138.462
156	1	bottom	0.300484	16	49188		40	40	39.3333	150
156	1	bottom	0.30354	17	49200	60	45	52.5	39.7333	150
156	1	bottom	0.306595	18	49212	45	45	45	40.1333	72
156	1	bottom	0.312962	19	49237	50	50	50	40.9667	150
156	1	bottom	0.316017	20	49249	40	40	40	41.3667	120
156	1	bottom	0.319837	21	49264	45	45	45	41.8667	150
156	1	bottom	0.322893	22	49276		45	45	42.2667	75
156	1	bottom	0.329004	23	49300	40	45	42.5	43.0667	150
156	1	bottom	0.33206	24	49312	45	50	47.5	43.4667	105.882
156	1	bottom	0.336389	25	49329		45	45	44.0333	138.462
156	1	bottom	0.3397	26	49342	45	50	47.5	44.4667	150
156	1	bottom	0.342755	27	49354	40	50	45	44.8667	75
156	1	bottom	0.348867	28	49378	50	50	50	45.6667	128.571
156	1	bottom	0.352432	29	49392		40	40	46.1333	128.571
156	1	bottom	0.355997	30	49406	50	55	52.5	46.6	150
156	1	bottom	0.359053	31	49418	50	50	50	47	150
156	1	bottom	0.362108	32	49430	45	40	42.5	47.4	138.462
156	1	bottom	0.365419	33	49443		45	45	47.8333	138.462
156	1	bottom	0.368729	34	49456	40	40	40	48.2667	78.2609
156	1	bottom	0.374586	35	49479	55	45	50	49.0333	163.636
156	1	bottom	0.377387	36	49490		40	40	49.4	163.636
156	1	bottom	0.380188	37	49501		35	35	49.7667	138.462
156	1	bottom	0.383499	38	49514		35	35	50.2	120
156	1	bottom	0.387319	39	49529	45	50	47.5	50.7	128.571
156	1	bottom	0.390884	40	49543	40	40	40	51.1667	100
156	1	bottom	0.395467	41	49561	40	50	45	51.7667	150
156	1	bottom	0.398523	42	49573	55	50	52.5	52.1667	138.462
156	1	bottom	0.401833	43	49586		40	40	52.6	150
156	1	bottom	0.404889	44	49598	40	50	45	53	163.636
156	1	bottom	0.40769	45	49609	45	40	42.5	53.3667	163.636
156	1	bottom	0.410491	46	49620		30	30	53.7333	138.462
156	1	bottom	0.413802	47	49633		45	45	54.1667	180
156	1	bottom	0.416348	48	49643	40	40	40	54.5	150
156	1	bottom	0.419404	49	49655	45	50	47.5	54.9	163.636
156	1	bottom	0.422205	50	49666	45	45	45	55.2667	163.636
156	1	bottom	0.425006	51	49677		35	35	55.6333	163.636
156	1	bottom	0.427807	52	49688	45	40	42.5	56	163.636
156	1	bottom	0.430609	53	49699	35	45	40	56.3667	163.636
156	1	bottom	0.43341	54	49710	45	40	42.5	56.7333	138.462
156	1	bottom	0.43672	55	49723	45	40	42.5	57.1667	163.636
156	1	bottom	0.439521	56	49734	45	35	40	57.5333	150
156	1	bottom	0.442577	57	49746		40	40	57.9333	163.636
156	1	bottom	0.445378	58	49757	35	40	37.5	58.3	180
156	1	bottom	0.447925	59	49767	40	40	40	58.6333	138.462
156	1	bottom	0.451235	60	49780		40	40	59.0667	150
156	1	bottom	0.454291	61	49792		45	45	59.4667	163.636
156	1	bottom	0.457092	62	49803	50	35	42.5	59.8333	200
156	1	bottom	0.459384	63	49812	40	30	35	60.1333	180
156	1	bottom	0.46193	64	49822		45	45	60.4667	180
156	1	bottom	0.464477	65	49832		45	45	60.8	163.636
156	1	bottom	0.467278	66	49843		40	40	61.1667	200
156	1	bottom	0.46957	67	49852	45	40	42.5	61.4667	200
156	1	bottom	0.471861	68	49861		35	35	61.7667	33.9623
156	1	bottom	0.485358	69	49914	40	40	40	63.5333	112.5
156	1	bottom	0.489432	70	49930	70	50	60	64.0667	128.571
156	1	bottom	0.492997	71	49944	70		70	64.5333	30
156	1	ascent	0.508276	1	50004	60	60	60	66.5333	94.7368
156	1	ascent	0.513114	2	50023	75	50	62.5	67.1667	81.8182
156	1	ascent	0.518717	3	50045	70	50	60	67.9	24
156	1	ascent	0.537815	4	50120		65	65	70.4	62.069
156	1	ascent	0.5452	5	50149	65	55	60	71.3667	34.6154
156	1	ascent	0.558442	6	50201		60	60	73.1	38.2979
156	1	ascent	0.57041	7	50248		55	55	74.6667	72
156	1	ascent	0.576776	8	50273	60	50	55	75.5	40
156	1	ascent	0.588235	9	50318	60	55	57.5	77	45
156	1	ascent	0.598421	10	50358		60	60	78.3333	56.25
156	1	ascent	0.60657	11	50390	70	55	62.5	79.4	52.9412
156	1	ascent	0.615228	12	50424	70	50	60	80.5333	45
156	1	ascent	0.625414	13	50464		70	70	81.8667	37.5
156	1	ascent	0.637637	14	50512	55	60	57.5	83.4667	42.8571
156	1	ascent	0.648332	15	50554	70	55	62.5	84.8667	36.7347
156	1	ascent	0.66081	16	50603		50	50	86.5	72
156	1	ascent	0.667176	17	50628	60	55	57.5	87.3333	18.5567
156	1	ascent	0.691877	18	50725	65	45	55	90.5667	24
156	1	ascent	0.710975	19	50800	60	50	55	93.0667	15.5172
156	1	ascent	0.740514	20	50916		40	40	96.9333	17.3077
156	1	ascent	0.766998	21	51020		55	55	100.4	1.96721
156	1	ascent	1	22	51935				130.9	-0.458365	end of dive
173	1	descent	0	1	121811	70	70	70	0	163.636
173	1	descent	0.00251947	2	121822	70	65	67.5	0.366667	180
173	1	descent	0.00480989	3	121832	65	70	67.5	0.7	163.636
173	1	descent	0.00732936	4	121843	75	65	70	1.06667	163.636
173	1	descent	0.00984883	5	121854	75	70	72.5	1.43333	163.636
173	1	descent	0.0123683	6	121865	75	75	75	1.8	163.636
173	1	descent	0.0148878	7	121876	75	75	75	2.16667	163.636
173	1	descent	0.0174072	8	121887	75	75	75	2.53333	163.636
173	1	descent	0.0199267	9	121898	70	70	70	2.9	900
173	1	descent	0.0203848	10	121900	70	70	70	2.96667	85.7143
173	1	descent	0.0251947	11	121921	75	70	72.5	3.66667	150
173	1	descent	0.0279432	12	121933	75	75	75	4.06667	163.636
173	1	descent	0.0304627	13	121944	70	70	70	4.43333	150
173	1	descent	0.0332112	14	121956	70	70	70	4.83333	150
173	1	descent	0.0359597	15	121968	70	70	70	5.23333	150
173	1	descent	0.0387082	16	121980	70	70	70	5.63333	150
173	1	descent	0.0414567	17	121992	70	70	70	6.03333	150
173	1	descent	0.0442052	18	122004	70	70	70	6.43333	150
173	1	descent	0.0469537	19	122016	65	70	67.5	6.83333	150
173	1	descent	0.0497022	20	122028	65	65	65	7.23333	138.462
173	1	descent	0.0526798	21	122041	65	65	65	7.66667	138.462
173	1	descent	0.0556574	22	122054	70	65	67.5	8.1	138.462
173	1	descent	0.0586349	23	122067	70	70	70	8.53333	138.462
173	1	descent	0.0616125	24	122080	70	70	70	8.96667	138.462
173	1	descent	0.06459	25	122093	70	70	70	9.4	138.462
173	1	descent	0.0675676	26	122106	70	70	70	9.83333	138.462
173	1	descent	0.0705451	27	122119	70	65	67.5	10.2667	138.462
173	1	descent	0.0735227	28	122132	70	65	67.5	10.7	150
173	1	descent	0.0762712	29	122144	70	60	65	11.1	138.462
173	1	descent	0.0792487	30	122157	70	55	62.5	11.5333	138.462
173	1	descent	0.0822263	31	122170	65	60	62.5	11.9667	138.462
173	1	descent	0.0852038	32	122183	65	60	62.5	12.4	138.462
173	1	descent	0.0881814	33	122196	60	55	57.5	12.8333	138.462
173	1	descent	0.091159	34	122209	60	60	60	13.2667	138.462
173	1	descent	0.0941365	35	122222	55	60	57.5	13.7	128.571
173	1	descent	0.0973431	36	122236	65	65	65	14.1667	138.462
173	1	descent	0.100321	37	122249	65	60	62.5	14.6	138.462
173	1	descent	0.103298	38	122262	65	65	65	15.0333	138.462
173	1	descent	0.106276	39	122275	65	65	65	15.4667	138.462
173	1	descent	0.109253	40	122288	60	60	60	15.9	138.462
173	1	descent	0.112231	41	122301	65	65	65	16.3333	128.571
173	1	descent	0.115437	42	122315	70	65	67.5	16.8	138.462
173	1	descent	0.118415	43	122328	65	60	62.5	17.2333	138.462
173	1	descent	0.121393	44	122341	70	60	65	17.6667	138.462
173	1	descent	0.12437	45	122354	60	60	60	18.1	128.571
173	1	descent	0.127577	46	122368	65	65	65	18.5667	138.462
173	1	descent	0.130554	47	122381	65	60	62.5	19	128.571
173	1	descent	0.133761	48	122395	65	65	65	19.4667	138.462
173	1	descent	0.136738	49	122408	60	65	62.5	19.9	138.462
173	1	descent	0.139716	50	122421	60	65	62.5	20.3333	138.462
173	1	descent	0.142694	51	122434	60	65	62.5	20.7667	128.571
173	1	descent	0.1459	52	122448	60	60	60	21.2333	128.571
173	1	descent	0.149107	53	122462	65	55	60	21.7	128.571
173	1	descent	0.152313	54	122476	65	60	62.5	22.1667	138.462
173	1	descent	0.155291	55	122489	70	60	65	22.6	128.571
173	1	descent	0.158497	56	122503	65	60	62.5	23.0667	138.462
173	1	descent	0.161475	57	122516	65	60	62.5	23.5	128.571
173	1	descent	0.164682	58	122530	60	60	60	23.9667	138.462
173	1	descent	0.167659	59	122543	60	55	57.5	24.4	128.571
173	1	descent	0.170866	60	122557	60	65	62.5	24.8667	128.571
173	1	descent	0.174072	61	122571	60	60	60	25.3333	128.571
173	1	descent	0.177279	62	122585	65	60	62.5	25.8	138.462
173	1	descent	0.180257	63	122598	60	55	57.5	26.2333	128.571
173	1	descent	0.183463	64	122612	65	60	62.5	26.7	128.571
173	1	descent	0.18667	65	122626	60	60	60	27.1667	128.571
173	1	descent	0.189876	66	122640	65	60	62.5	27.6333	120
173	1	descent	0.193312	67	122655	65	60	62.5	28.1333	128.571
173	1	descent	0.196519	68	122669	60	50	55	28.6	112.5
173	1	descent	0.200183	69	122685	55	60	57.5	29.1333	105.882
173	1	descent	0.204077	70	122702	60	65	62.5	29.7	120
173	1	descent	0.207513	71	122717	55	60	57.5	30.2	120
173	1	descent	0.210948	72	122732	60	65	62.5	30.7	112.5
173	1	descent	0.214613	73	122748	45	50	47.5	31.2333	81.8182
173	1	descent	0.219652	74	122770	55	50	52.5	31.9667	120
173	1	descent	0.223087	75	122785	60	45	52.5	32.4667	100
173	1	descent	0.22721	76	122803	65	45	55	33.0667	120
173	1	descent	0.230646	77	122818	65	50	57.5	33.5667	128.571
173	1	descent	0.233852	78	122832	55	55	55	34.0333	112.5
173	1	descent	0.237517	79	122848	55	50	52.5	34.5667	128.571
173	1	bottom	0.240724	1	122862	55	60	57.5	35.0333	150
173	1	bottom	0.243472	2	122874	50	60	55	35.4333	150
173	1	bottom	0.246221	3	122886	45	45	45	35.8333	150
173	1	bottom	0.248969	4	122898	45	45	45	36.2333	128.571
173	1	bottom	0.252176	5	122912	50	40	45	36.7	163.636
173	1	bottom	0.254695	6	122923	45	45	45	37.0667	163.636
173	1	bottom	0.257215	7	122934	55	50	52.5	37.4333	180
173	1	bottom	0.259505	8	122944	50	45	47.5	37.7667	163.636
173	1	bottom	0.262025	9	122955		45	45	38.1333	150
173	1	bottom	0.264773	10	122967	50	45	47.5	38.5333	180
173	1	bottom	0.267064	11	122977	45	45	45	38.8667	32.1429
173	1	bottom	0.27989	12	123033				40.7333	9.375	stationary prey search start
173	1	bottom	0.323866	13	123225	50	45	47.5	47.1333	38.2979
173	1	bottom	0.334631	14	123272		50	50	48.7	64.2857
173	1	bottom	0.341044	15	123300	55	50	52.5	49.6333	120
173	1	bottom	0.34448	16	123315	60	55	57.5	50.1333	128.571
173	1	bottom	0.347687	17	123329	55	50	52.5	50.6	128.571
173	1	bottom	0.350893	18	123343	55	50	52.5	51.0667	128.571
173	1	bottom	0.3541	19	123357	50	45	47.5	51.5333	105.882
173	1	bottom	0.357994	20	123374	50	55	52.5	52.1	138.462
173	1	bottom	0.360971	21	123387	50	50	50	52.5333	138.462
173	1	bottom	0.363949	22	123400	50	50	50	52.9667	163.636
173	1	bottom	0.366468	23	123411	40	45	42.5	53.3333	128.571
173	1	bottom	0.369675	24	123425		40	40	53.8	150
173	1	bottom	0.372423	25	123437	45	40	42.5	54.2	138.462
173	1	bottom	0.375401	26	123450	50	45	47.5	54.6333	163.636
173	1	bottom	0.37792	27	123461		55	55	55	200
173	1	bottom	0.379982	28	123470	60	50	55	55.3	225
173	1	bottom	0.381814	29	123478	55	35	45	55.5667	225
173	1	bottom	0.383646	30	123486	40	30	35	55.8333	225
173	1	bottom	0.385479	31	123494	45	30	37.5	56.1	200
173	1	bottom	0.38754	32	123503	35	40	37.5	56.4	200
173	1	bottom	0.389601	33	123512	35	40	37.5	56.7	163.636
173	1	bottom	0.392121	34	123523	40	40	40	57.0667	200
173	1	bottom	0.394182	35	123532	45	45	45	57.3667	225
173	1	bottom	0.396015	36	123540	40	35	37.5	57.6333	200
173	1	bottom	0.398076	37	123549	40	40	40	57.9333	200
173	1	bottom	0.400137	38	123558	40	40	40	58.2333	200
173	1	bottom	0.402199	39	123567	35	35	35	58.5333	150
173	1	bottom	0.404947	40	123579	40	35	37.5	58.9333	200
173	1	bottom	0.407009	41	123588	35	30	32.5	59.2333	32.1429
173	1	bottom	0.419835	42	123644				61.1	34.6154	prey encounter starts
173	1	bottom	0.431745	43	123696	75	55	65	62.8333	112.5
173	1	bottom	0.43541	44	123712	75	50	62.5	63.3667	120
173	1	bottom	0.438846	45	123727	55	40	47.5	63.8667	105.882
173	1	bottom	0.442739	46	123744	55	55	55	64.4333	72
173	1	bottom	0.448465	47	123769	50	50	50	65.2667	112.5
173	1	bottom	0.45213	48	123785	50	55	52.5	65.8	138.462
173	1	bottom	0.455108	49	123798	45	45	45	66.2333	128.571
173	1	bottom	0.458314	50	123812	55	45	50	66.7	150
173	1	bottom	0.461063	51	123824	45	50	47.5	67.1	150
173	1	bottom	0.463811	52	123836	30	40	35	67.5	138.462
173	1	bottom	0.466789	53	123849		40	40	67.9333	150
173	1	bottom	0.469537	54	123861	40	40	40	68.3333	225
173	1	bottom	0.47137	55	123869	50		50	68.6	180
173	1	bottom	0.47366	56	123879	60	60	60	68.9333	225
173	1	bottom	0.475492	57	123887	55	45	50	69.2	225
173	1	bottom	0.477325	58	123895	40	45	42.5	69.4667	225	exhalation, pry pursuit start
173	1	bottom	0.479157	59	123903	50	45	47.5	69.7333	225
173	1	bottom	0.480989	60	123911	45	35	40	70	225
173	1	bottom	0.482822	61	123919	45	40	42.5	70.2667	225
173	1	bottom	0.484654	62	123927	35	30	32.5	70.5333	200
173	1	bottom	0.486716	63	123936	40	30	35	70.8333	200
173	1	bottom	0.488777	64	123945		40	40	71.1333	180
173	1	bottom	0.491067	65	123955	45	40	42.5	71.4667	150
173	1	bottom	0.493816	66	123967		30	30	71.8667	19.5652
173	1	bottom	0.514888	67	124059	60	40	50	74.9333	112.5
173	1	bottom	0.518552	68	124075	50	30	40	75.4667	1.74927
173	1	bottom	0.754237	69	125104	60	65	62.5	109.767	-1.82556
173	1	bottom	0.528401	70	124118	50	55	52.5	76.9	138.462
173	1	bottom	0.531379	71	124131	50	55	52.5	77.3333	138.462
173	1	bottom	0.534356	72	124144	50	55	52.5	77.7667	150
173	1	bottom	0.537105	73	124156	50	50	50	78.1667	150
173	1	bottom	0.539853	74	124168	50	45	47.5	78.5667	180
173	1	bottom	0.542144	75	124178	50	45	47.5	78.9	150
173	1	bottom	0.544892	76	124190	45	35	40	79.3	163.636
173	1	bottom	0.547412	77	124201	40	40	40	79.6667	150
173	1	bottom	0.55016	78	124213	40	45	42.5	80.0667	163.636
173	1	bottom	0.55268	79	124224	50	45	47.5	80.4333	150
173	1	bottom	0.555428	80	124236	40	35	37.5	80.8333	150
173	1	bottom	0.558177	81	124248		40	40	81.2333	163.636
173	1	bottom	0.560696	82	124259	45	40	42.5	81.6	150
173	1	bottom	0.563445	83	124271	45	50	47.5	82	138.462
173	1	bottom	0.566422	84	124284	45	40	42.5	82.4333	150
173	1	bottom	0.569171	85	124296	50	50	50	82.8333	150
173	1	bottom	0.571919	86	124308		50	50	83.2333	180
173	1	bottom	0.57421	87	124318		35	35	83.5667	180
173	1	bottom	0.5765	88	124328		40	40	83.9	180
173	1	bottom	0.578791	89	124338		40	40	84.2333	163.636
173	1	bottom	0.58131	90	124349	55	50	52.5	84.6	163.636
173	1	bottom	0.58383	91	124360		40	40	84.9667	128.571
173	1	bottom	0.587036	92	124374		45	45	85.4333	128.571
173	1	bottom	0.590243	93	124388	50	55	52.5	85.9	163.636
173	1	bottom	0.592762	94	124399	50	55	52.5	86.2667	128.571
173	1	bottom	0.595969	95	124413	45	45	45	86.7333	150
173	1	bottom	0.598717	96	124425		45	45	87.1333	150
173	1	bottom	0.601466	97	124437	55	50	52.5	87.5333	138.462
173	1	bottom	0.604443	98	124450	50	45	47.5	87.9667	105.882
173	1	bottom	0.608337	99	124467		45	45	88.5333	150
173	1	bottom	0.611086	100	124479	45	50	47.5	88.9333	150
173	1	bottom	0.613834	101	124491	45	50	47.5	89.3333	163.636
173	1	bottom	0.616354	102	124502	45	45	45	89.7	150
173	1	bottom	0.619102	103	124514		40	40	90.1	150
173	1	bottom	0.621851	104	124526	40	50	45	90.5	180
173	1	bottom	0.624141	105	124536	45	40	42.5	90.8333	163.636
173	1	bottom	0.626661	106	124547	40	35	37.5	91.2	200
173	1	bottom	0.628722	107	124556	40	45	42.5	91.5	225
173	1	bottom	0.630554	108	124564	50	50	50	91.7667	100
173	1	bottom	0.634677	109	124582		25	25	92.3667	180
173	1	bottom	0.636967	110	124592	55	50	52.5	92.7	180
173	1	bottom	0.639258	111	124602	55	50	52.5	93.0333	120
173	1	bottom	0.642694	112	124617	35	40	37.5	93.5333	163.636
173	1	bottom	0.645213	113	124628	45	50	47.5	93.9	128.571
173	1	bottom	0.64842	114	124642	40	50	45	94.3667	163.636
173	1	bottom	0.650939	115	124653	45	50	47.5	94.7333	180
173	1	bottom	0.65323	116	124663	45	50	47.5	95.0667	163.636
173	1	bottom	0.655749	117	124674	50	45	47.5	95.4333	150
173	1	bottom	0.658497	118	124686	45	40	42.5	95.8333	163.636
173	1	bottom	0.661017	119	124697	50	50	50	96.2	163.636
173	1	bottom	0.663536	120	124708	45	45	45	96.5667	200
173	1	bottom	0.665598	121	124717		60	60	96.8667	225
173	1	bottom	0.66743	122	124725	65	50	57.5	97.1333	225
173	1	bottom	0.669262	123	124733	45		45	97.4	225
173	1	bottom	0.671095	124	124741		35	35	97.6667	257.143
173	1	bottom	0.672698	125	124748		45	45	97.9	225
173	1	bottom	0.67453	126	124756	55	50	52.5	98.1667	225
173	1	bottom	0.676363	127	124764		40	40	98.4333	27.2727
173	1	bottom	0.69148	128	124830				100.633	46.1538	prey encounter starts
173	1	bottom	0.700412	129	124869	70		70	101.933	150
173	1	bottom	0.703161	130	124881	70	70	70	102.333	138.462
173	1	bottom	0.706138	131	124894	50	70	60	102.767	128.571
173	1	bottom	0.709345	132	124908		50	50	103.233	47.3684
173	1	bottom	0.718049	133	124946				104.5	45	prey capture
173	1	bottom	0.72721	134	124986		65	65	105.833	90	prey encounter end
173	1	ascent	0.731791	1	125006		65	65	106.5	75
173	1	ascent	0.737288	2	125030	70	70	70	107.3	90
173	1	ascent	0.741869	3	125050	60	60	60	107.967	75
173	1	ascent	0.747366	4	125074	60	60	60	108.767	58.0645
173	1	ascent	0.754466	5	125105	65	60	62.5	109.8	43.9024
173	1	ascent	0.763857	6	125146	60	55	57.5	111.167	72
173	1	ascent	0.769583	7	125171	55	55	55	112	38.2979
173	1	ascent	0.780348	8	125218	65	60	62.5	113.567	24.6575
173	1	ascent	0.797068	9	125291	55	55	55	116	60
173	1	ascent	0.80394	10	125321	55	50	52.5	117	32.7273
173	1	ascent	0.816537	11	125376	65	60	62.5	118.833	24
173	1	ascent	0.833715	12	125451	70	55	62.5	121.333	2.47934
173	1	ascent	1	13	126177				145.533	-0.412277	end of dive

## Sheet: flipper graphs
dive no	phase	relative dive time	mean angle	BPM		dive no	phase	relative dive time	mean angle	BPM			dive no	phase	relative dive time	mean angle	BPM
152	descent	0	67.5	180		152	bottom	0	50	138.462			152	ascent	0	55	22.7848
153	descent	0	87.5	180		153	bottom	0	52.5	138.462			153	ascent	0	55	100
180	descent	0	72.5	163.636		180	bottom	0	50	150			180	ascent	0	52.5	90
156	descent	0	70	180		156	bottom	0	62.5	69.2308			156	ascent	0	60	94.7368
173	descent	0	70	163.636		173	bottom	0	57.5	150			173	ascent	0	65	75
153	descent	0.0100806	67.5	163.636		173	bottom	0.00564972	55	150			153	ascent	0.00959488	70	120
152	descent	0.0102775	70	163.636		180	bottom	0.00656455	50	138.462			156	ascent	0.00983946	62.5	81.8182
173	descent	0.0106075	67.5	180		152	bottom	0.00925926	50	128.571			180	ascent	0.0165837	52.5	45
156	descent	0.0113895	72.5	180		173	bottom	0.0112994	45	150			153	ascent	0.0175906	55	128.571
180	descent	0.0128205	67.5	180		153	bottom	0.0122295	47.5	138.462			173	ascent	0.0204953	70	90
173	descent	0.0202507	67.5	163.636		180	bottom	0.0136761	45	163.636			156	ascent	0.0212325	60	24
153	descent	0.0211694	75	180		173	bottom	0.0169492	45	128.571			153	ascent	0.0250533	55	180
152	descent	0.0215827	75	163.636		152	bottom	0.0192308	42.5	138.462			153	ascent	0.0303838	65	163.636
156	descent	0.022779	67.5	163.636		180	bottom	0.0196937	42.5	150			153	ascent	0.0362473	70	138.462
180	descent	0.0244755	72.5	163.636		173	bottom	0.0235405	45	163.636			173	ascent	0.0375747	60	75
173	descent	0.0308582	70	163.636		153	bottom	0.0244591	42.5	64.2857			153	ascent	0.043177	47.5	64.2857
153	descent	0.03125	70	163.636		156	bottom	0.0249042	37.5	105.882			152	ascent	0.0435742	57.5	29.5082
152	descent	0.032888	75	180		180	bottom	0.0262582	45	150			180	ascent	0.0497512	55	48.6486
156	descent	0.0353075	75	180		152	bottom	0.02849	45	75			173	ascent	0.05807	60	58.0645
180	descent	0.037296	75	180		173	bottom	0.0287194	45	163.636			153	ascent	0.0581023	55	46.1538
173	descent	0.0414658	72.5	163.636		180	bottom	0.0328228	40	128.571			156	ascent	0.0600725	65	62.069
153	descent	0.0423387	72.5	180		173	bottom	0.0338983	52.5	180			156	ascent	0.0750906	60	34.6154
152	descent	0.0431655	72.5	163.636		173	bottom	0.0386064	47.5	163.636			152	ascent	0.0772201	52.5	52.9412
156	descent	0.046697	70	163.636		180	bottom	0.0404814	45	150			153	ascent	0.0788913	45	45
180	descent	0.048951	72.5	163.636		156	bottom	0.0411877	45	138.462			180	ascent	0.0804312	57.5	52.9412
173	descent	0.0520733	75	163.636		173	bottom	0.0437853	45	150			173	ascent	0.0845431	62.5	43.9024
153	descent	0.0524194	67.5	163.636		152	bottom	0.045584	40	128.571			152	ascent	0.0959735	55	66.6667
152	descent	0.0544707	77.5	163.636		180	bottom	0.047046	45	150			153	ascent	0.100213	57.5	33.9623
156	descent	0.0592255	70	163.636		173	bottom	0.049435	47.5	180			156	ascent	0.10202	60	38.2979
180	descent	0.0617716	72.5	163.636		153	bottom	0.0507996	40	150			180	ascent	0.108624	57.5	35.2941
173	descent	0.0626808	75	163.636		180	bottom	0.0536105	45	138.462			152	ascent	0.110866	52.5	39.1304
153	descent	0.0635081	75	163.636		156	bottom	0.0536398	50	90			173	ascent	0.119556	57.5	72
152	descent	0.065776	72.5	163.636		173	bottom	0.0541431	45	32.1429			156	ascent	0.126359	55	72
156	descent	0.071754	70	163.636		152	bottom	0.0555556	40	128.571			153	ascent	0.128465	57.5	38.2979
173	descent	0.0732883	75	163.636		180	bottom	0.0607221	50	150			152	ascent	0.136238	55	31.0345
180	descent	0.0745921	72.5	163.636		153	bottom	0.0620884	47.5	150			156	ascent	0.139306	55	40
153	descent	0.0745968	80	163.636		152	bottom	0.0655271	30	150			173	ascent	0.140905	55	38.2979
152	descent	0.0770812	72.5	150		180	bottom	0.0672867	42.5	163.636			180	ascent	0.150912	57.5	36.7347
173	descent	0.0838959	70	900		156	bottom	0.0727969	50	138.462			153	ascent	0.153518	50	56.25
156	descent	0.0842825	70	163.636		180	bottom	0.0733042	42.5	150			156	ascent	0.16261	57.5	45
153	descent	0.0856855	72.5	163.636		153	bottom	0.0733772	35	150			152	ascent	0.168229	62.5	22.5
173	descent	0.0858245	70	85.7143		152	bottom	0.0740741	47.5	150			153	ascent	0.170576	55	40
180	descent	0.0874126	75	163.636		180	bottom	0.0798687	40	120			173	ascent	0.181042	62.5	24.6575
152	descent	0.0894142	75	150		173	bottom	0.0805085		9.375			156	ascent	0.183325	60	56.25
153	descent	0.0967742	70	150		152	bottom	0.0826211	45	85.7143			180	ascent	0.191542	55	46.1538
156	descent	0.0968109	70	150		153	bottom	0.084666	42.5	78.2609			153	ascent	0.194563	60	24.6575
180	descent	0.100233	72.5	163.636		156	bottom	0.085249	45	60			156	ascent	0.199896	62.5	52.9412
152	descent	0.101747	70	163.636		180	bottom	0.0880744	45	94.7368			152	ascent	0.212355	57.5	27.2727
173	descent	0.106075	72.5	150		152	bottom	0.0975783	45	150			156	ascent	0.217504	60	45
153	descent	0.108871	75	150		180	bottom	0.0984683	35	163.636			180	ascent	0.223881	60	27.6923
156	descent	0.110478	70	150		180	bottom	0.104486	52.5	163.636			153	ascent	0.233475	57.5	36
152	descent	0.113052	70	150		152	bottom	0.106125	40	150			156	ascent	0.238219	70	37.5
180	descent	0.113054	72.5	150		153	bottom	0.106303	47.5	138.462			173	ascent	0.243382	55	60
173	descent	0.117647	75	163.636		180	bottom	0.110503	45	163.636			152	ascent	0.248759	57.5	14.0625
153	descent	0.120968	72.5	163.636		156	bottom	0.113985	40	112.5			153	ascent	0.260128	55	36
156	descent	0.124146	70	163.636		152	bottom	0.114672	40	69.2308			156	ascent	0.263076	57.5	42.8571
152	descent	0.125385	70	150		180	bottom	0.116521	45	41.8605			173	ascent	0.269001	52.5	32.7273
180	descent	0.12704	72.5	163.636		153	bottom	0.118532	50	138.462			180	ascent	0.277778	57.5	24.6575
173	descent	0.128255	70	150		156	bottom	0.12931	47.5	200			156	ascent	0.284827	62.5	36.7347
153	descent	0.132056	70	150		153	bottom	0.130762	42.5	72			153	ascent	0.28678	57.5	30.5085
156	descent	0.136674	67.5	150		152	bottom	0.133191	37.5	150			156	ascent	0.310202	50	72
152	descent	0.137718	70	138.462		156	bottom	0.137931	50	75			173	ascent	0.315969	62.5	24
173	descent	0.139826	70	150		180	bottom	0.140044	50	64.2857			153	ascent	0.31823	62.5	32.7273
180	descent	0.13986	70	150		152	bottom	0.141738	42.5	138.462			152	ascent	0.31936	50	13.1387
153	descent	0.144153	72.5	150		152	bottom	0.150997	40	150			156	ascent	0.323149	57.5	18.5567
156	descent	0.150342	70	150		153	bottom	0.15428	45	150			180	ascent	0.338308	60	2.10035
152	descent	0.151079	70	150		180	bottom	0.155361	55	150			153	ascent	0.347548	52.5	25
173	descent	0.151398	70	150		152	bottom	0.159544	35	163.636			156	ascent	0.373382	55	24
180	descent	0.153846	72.5	150		156	bottom	0.16092	57.5	112.5			173	ascent	0.380017	62.5	2.47934
153	descent	0.15625	70	150		180	bottom	0.161926	50	163.636			153	ascent	0.385928	55	23.0769
173	descent	0.16297	70	150		153	bottom	0.165569	40	150			152	ascent	0.394926	50	1.64084
152	descent	0.163412	72.5	150		152	bottom	0.167379	35	72			156	ascent	0.412222	55	15.5172
156	descent	0.164009	70	150		180	bottom	0.167943	40	163.636			153	ascent	0.427505	55	10.2273
180	descent	0.167832	70	150		173	bottom	0.170904	47.5	38.2979			156	ascent	0.472294	40	17.3077
153	descent	0.168347	72.5	150		180	bottom	0.173961	42.5	163.636			153	ascent	0.521322	52.5	2.00445
173	descent	0.174542	70	150		156	bottom	0.176245	52.5	64.2857			156	ascent	0.526152	55	1.96721
152	descent	0.175745	70	138.462		153	bottom	0.176858	40	58.0645			152	ascent	1
156	descent	0.177677	70	138.462		180	bottom	0.179978	42.5	150			153	ascent	1
153	descent	0.180444	72.5	138.462		152	bottom	0.185185	50	150			156	ascent	1		-0.458365
180	descent	0.181818	65	150		180	bottom	0.186543	40	163.636			173	ascent	1		-0.412277
173	descent	0.186114	70	150		180	bottom	0.19256	45	163.636			180	ascent	1.04892
152	descent	0.189106	70	138.462		173	bottom	0.193032	50	64.2857
156	descent	0.192483	72.5	150		152	bottom	0.193732	40	90
153	descent	0.193548	72.5	138.462		180	bottom	0.198578	45	128.571
180	descent	0.195804	67.5	138.462		156	bottom	0.203065	60	100
173	descent	0.197686	67.5	150		153	bottom	0.206021	40	150
152	descent	0.202467	70	150		173	bottom	0.206215	52.5	120
156	descent	0.20615	72.5	138.462		180	bottom	0.206236	47.5	150
153	descent	0.206653	72.5	150		152	bottom	0.207977	50	163.636
173	descent	0.209257	65	138.462		180	bottom	0.212801	40	150
180	descent	0.210956	75	150		173	bottom	0.213277	57.5	128.571
152	descent	0.2148	70	138.462		152	bottom	0.215812	42.5	163.636
153	descent	0.21875	70	138.462		153	bottom	0.21731	47.5	150
156	descent	0.220957	70	150		180	bottom	0.219365	47.5	150
173	descent	0.221794	65	138.462		173	bottom	0.219868	52.5	128.571
180	descent	0.224942	72.5	138.462		156	bottom	0.220307	55	112.5
152	descent	0.22816	72.5	138.462		152	bottom	0.223647	42.5	163.636
153	descent	0.231855	70	150		180	bottom	0.22593	50	163.636
173	descent	0.23433	67.5	138.462		173	bottom	0.22646	52.5	128.571
156	descent	0.234624	70	138.462		153	bottom	0.228598	47.5	150
180	descent	0.240093	72.5	150		152	bottom	0.231481	40	163.636
152	descent	0.241521	70	138.462		180	bottom	0.231947	42.5	150
153	descent	0.243952	67.5	138.462		173	bottom	0.233051	47.5	105.882
173	descent	0.246866	70	138.462		156	bottom	0.235632	52.5	62.069
156	descent	0.249431	72.5	150		180	bottom	0.238512	45	105.882
180	descent	0.254079	70	150		152	bottom	0.239316	42.5	150
152	descent	0.254882	70	138.462		153	bottom	0.239887	35	112.5
153	descent	0.257056	70	138.462		173	bottom	0.241055	52.5	138.462
173	descent	0.259402	70	138.462		173	bottom	0.247175	50	138.462
156	descent	0.263098	70	138.462		180	bottom	0.247812	47.5	150
180	descent	0.268065	65	138.462		152	bottom	0.247863	40	138.462
152	descent	0.268243	70	150		173	bottom	0.253296	50	163.636
153	descent	0.270161	72.5	138.462		180	bottom	0.254376	50	163.636
173	descent	0.271938	70	138.462		153	bottom	0.254939	35	180
156	descent	0.277904	72.5	138.462		152	bottom	0.257123	45	163.636
152	descent	0.280576	70	128.571		173	bottom	0.258475	42.5	128.571
180	descent	0.283217	72.5	138.462		180	bottom	0.260394	32.5	163.636
153	descent	0.283266	72.5	138.462		156	bottom	0.26341	52.5	138.462
173	descent	0.284474	70	138.462		153	bottom	0.264346	47.5	225
156	descent	0.292711	70	138.462		152	bottom	0.264957	45	72
152	descent	0.294964	75	150		173	bottom	0.265066	40	150
153	descent	0.296371	67.5	150		180	bottom	0.266411	35	150
173	descent	0.297011	67.5	138.462		173	bottom	0.270716	42.5	138.462
180	descent	0.298368	70	150		153	bottom	0.271872	45	225
152	descent	0.307297	72.5	138.462		180	bottom	0.272976	40	150
156	descent	0.307517	72.5	138.462		156	bottom	0.275862	40	150
153	descent	0.308468	60	138.462		173	bottom	0.276836	47.5	163.636
173	descent	0.309547	67.5	150		153	bottom	0.279398	37.5	225
180	descent	0.312354	67.5	138.462		180	bottom	0.27954	42.5	163.636
152	descent	0.320658	75	138.462		173	bottom	0.282015	55	200
173	descent	0.321119	65	138.462		152	bottom	0.282764	47.5	150
153	descent	0.321573	65	138.462		180	bottom	0.285558	45	150
156	descent	0.322323	70	150		173	bottom	0.286252	55	225
180	descent	0.327506	62.5	138.462		153	bottom	0.286924	35	225
173	descent	0.333655	62.5	138.462		156	bottom	0.287356	52.5	150
152	descent	0.334018	67.5	128.571		173	bottom	0.290019	45	225
153	descent	0.334677	67.5	150		152	bottom	0.291311	47.5	128.571
156	descent	0.335991	67.5	138.462		180	bottom	0.292123	45	150
180	descent	0.342657	72.5	138.462		173	bottom	0.293785	35	225
173	descent	0.346191	62.5	138.462		153	bottom	0.29445	37.5	200
153	descent	0.346774	65	138.462		173	bottom	0.297552	37.5	200
152	descent	0.348407	67.5	138.462		180	bottom	0.298687	45	163.636
156	descent	0.350797	67.5	138.462		156	bottom	0.298851	45	72
180	descent	0.357809	70	138.462		152	bottom	0.301282	47.5	138.462
173	descent	0.358727	62.5	138.462		173	bottom	0.301789	37.5	200
153	descent	0.359879	65	128.571		153	bottom	0.302916	40	200
152	descent	0.361768	70	138.462		180	bottom	0.304705	47.5	163.636
156	descent	0.365604	67.5	138.462		173	bottom	0.306026	37.5	163.636
173	descent	0.371263	57.5	138.462		152	bottom	0.310541	47.5	128.571
180	descent	0.37296	67.5	138.462		180	bottom	0.310722	32.5	150
153	descent	0.373992	67.5	138.462		173	bottom	0.311205	40	200
152	descent	0.375128	70	138.462		153	bottom	0.311383	35	180
156	descent	0.38041	65	120		173	bottom	0.315443	45	225
173	descent	0.383799	60	138.462		180	bottom	0.317287	40	163.636
153	descent	0.387097	65	138.462		173	bottom	0.319209	37.5	200
180	descent	0.388112	65	138.462		152	bottom	0.320513	47.5	138.462
152	descent	0.388489	70	138.462		153	bottom	0.32079	42.5	257.143
173	descent	0.396336	57.5	128.571		156	bottom	0.322797	50	150
156	descent	0.397494	67.5	138.462		180	bottom	0.323304	42.5	150
153	descent	0.400202	67.5	128.571		173	bottom	0.323446	40	200
152	descent	0.40185	70	138.462		153	bottom	0.327375	47.5	225
180	descent	0.403263	62.5	138.462		173	bottom	0.327684	40	200
173	descent	0.409836	65	138.462		152	bottom	0.329772	45	138.462
156	descent	0.412301	67.5	138.462		180	bottom	0.329869	40	163.636
153	descent	0.414315	67.5	138.462		173	bottom	0.331921	35	150
152	descent	0.415211	72.5	128.571		156	bottom	0.334291	40	120
180	descent	0.418415	67.5	138.462		153	bottom	0.334901	42.5	225
173	descent	0.422372	62.5	138.462		180	bottom	0.335886	40	180
156	descent	0.427107	67.5	138.462		173	bottom	0.337571	37.5	200
153	descent	0.427419	67.5	138.462		152	bottom	0.339031	50	150
152	descent	0.429599	70	138.462		180	bottom	0.341357	47.5	150
180	descent	0.433566	62.5	128.571		173	bottom	0.341808	32.5	32.1429
173	descent	0.434908	65	138.462		153	bottom	0.342427	35	200
153	descent	0.440524	62.5	128.571		152	bottom	0.347578	47.5	69.2308
156	descent	0.441913	65	128.571		180	bottom	0.347921	45	78.2609
152	descent	0.44296	70	128.571		156	bottom	0.348659	45	150
173	descent	0.447445	65	138.462		153	bottom	0.350894	30	2.6087
180	descent	0.449883	62.5	138.462		156	bottom	0.360153	45	75
153	descent	0.454637	62.5	138.462		180	bottom	0.360503	52.5	163.636
152	descent	0.457348	72.5	128.571		152	bottom	0.366097	50	163.636
156	descent	0.457859	70	138.462		180	bottom	0.366521	50	163.636
173	descent	0.459981	60	138.462		173	bottom	0.368173		34.6154
180	descent	0.465035	62.5	138.462		180	bottom	0.372538	37.5	150
153	descent	0.467742	65	138.462		152	bottom	0.373932	47.5	180
152	descent	0.471737	67.5	128.571		180	bottom	0.379103	40	163.636
173	descent	0.472517	65	128.571		152	bottom	0.381054	42.5	163.636
156	descent	0.472665	67.5	128.571		156	bottom	0.383142	42.5	150
180	descent	0.480186	65	138.462		180	bottom	0.38512	42.5	120
153	descent	0.480847	62.5	128.571		152	bottom	0.388889	37.5	150
173	descent	0.486017	67.5	138.462		173	bottom	0.392655	65	112.5
152	descent	0.486125	72.5	128.571		180	bottom	0.393326	45	150
156	descent	0.48861	67.5	138.462		156	bottom	0.394636	47.5	105.882
153	descent	0.49496	62.5	138.462		152	bottom	0.397436	45	163.636
180	descent	0.495338	60	150		180	bottom	0.399891	45	163.636
173	descent	0.498554	62.5	138.462		173	bottom	0.400188	62.5	120
152	descent	0.500514	67.5	128.571		152	bottom	0.405271	27.5	128.571
156	descent	0.503417	67.5	128.571		180	bottom	0.405908	42.5	138.462
153	descent	0.508065	62.5	138.462		173	bottom	0.40725	47.5	105.882
180	descent	0.509324	62.5	138.462		156	bottom	0.41092	45	138.462
173	descent	0.51109	65	138.462		180	bottom	0.41302	45	78.2609
152	descent	0.514902	65	138.462		152	bottom	0.415242	40	150
156	descent	0.519362	65	138.462		173	bottom	0.415254	55	72
153	descent	0.521169	57.5	128.571		156	bottom	0.423372	47.5	150
173	descent	0.523626	60	128.571		152	bottom	0.423789	45	150
180	descent	0.524476	62.5	128.571		180	bottom	0.425602	52.5	150
152	descent	0.528263	67.5	128.571		173	bottom	0.427024	50	112.5
156	descent	0.534169	67.5	128.571		180	bottom	0.432166	52.5	163.636
153	descent	0.535282	62.5	138.462		152	bottom	0.432336	47.5	180
173	descent	0.537126	65	138.462		173	bottom	0.434557	52.5	138.462
180	descent	0.540793	62.5	138.462		156	bottom	0.434866	45	75
152	descent	0.542652	67.5	128.571		180	bottom	0.438184	47.5	163.636
153	descent	0.548387	60	128.571		152	bottom	0.439459	35	62.069
173	descent	0.549662	62.5	128.571		173	bottom	0.440678	45	128.571
156	descent	0.550114	65	138.462		180	bottom	0.444201	40	120
180	descent	0.555944	62.5	138.462		173	bottom	0.447269	50	150
152	descent	0.55704	67.5	128.571		180	bottom	0.452407	40	163.636
153	descent	0.5625	62.5	128.571		173	bottom	0.452919	47.5	150
173	descent	0.563163	65	138.462		156	bottom	0.457854	50	128.571
156	descent	0.56492	65	128.571		180	bottom	0.458425	47.5	163.636
180	descent	0.571096	62.5	138.462		173	bottom	0.458569	35	138.462
152	descent	0.571429	67.5	138.462		152	bottom	0.460114	40	180
173	descent	0.575699	62.5	138.462		180	bottom	0.464442	37.5	163.636
153	descent	0.576613	62.5	128.571		173	bottom	0.464689	40	150
156	descent	0.580866	65	128.571		152	bottom	0.467236	37.5	66.6667
152	descent	0.584789	70	120		173	bottom	0.470339	40	225
180	descent	0.586247	62.5	138.462		180	bottom	0.47046	40	128.571
173	descent	0.588235	62.5	138.462		156	bottom	0.471264	40	128.571
153	descent	0.590726	62.5	150		173	bottom	0.474105	50	180
156	descent	0.596811	62.5	138.462		180	bottom	0.478118	30	163.636
152	descent	0.600206	70	128.571		173	bottom	0.478814	60	225
173	descent	0.600771	62.5	128.571		173	bottom	0.48258	50	225
180	descent	0.601399	60	150		180	bottom	0.484136	40	120
153	descent	0.602823	62.5	128.571		156	bottom	0.484674	52.5	150
156	descent	0.611617	62.5	128.571		173	bottom	0.486347	42.5	225
173	descent	0.614272	60	128.571		152	bottom	0.486467	37.5	150
152	descent	0.614594	67.5	138.462		173	bottom	0.490113	47.5	225
180	descent	0.615385	65	138.462		180	bottom	0.492341	45	150
153	descent	0.616935	65	138.462		173	bottom	0.493879	40	225
156	descent	0.627563	67.5	138.462		152	bottom	0.495014	40	138.462
173	descent	0.627772	60	128.571		156	bottom	0.496169	50	150
152	descent	0.627955	70	128.571		173	bottom	0.497646	42.5	225
153	descent	0.63004	62.5	128.571		180	bottom	0.498906	47.5	138.462
180	descent	0.630536	60	128.571		173	bottom	0.501412	32.5	200
173	descent	0.641273	62.5	138.462		152	bottom	0.504274	40	163.636
152	descent	0.642343	67.5	128.571		173	bottom	0.50565	35	200
156	descent	0.642369	67.5	128.571		180	bottom	0.506018	50	150
153	descent	0.644153	65	138.462		156	bottom	0.507663	42.5	138.462
180	descent	0.646853	62.5	138.462		173	bottom	0.509887	40	180
173	descent	0.653809	65	128.571		152	bottom	0.512108	42.5	163.636
152	descent	0.656732	62.5	128.571		180	bottom	0.512582	45	150
153	descent	0.657258	55	128.571		173	bottom	0.514595	42.5	150
156	descent	0.658314	70	138.462		180	bottom	0.519147	45	163.636
180	descent	0.662005	65	128.571		152	bottom	0.519943	27.5	128.571
173	descent	0.66731	62.5	138.462		156	bottom	0.520115	45	138.462
152	descent	0.67112	65	138.462		173	bottom	0.520245	30	19.5652
153	descent	0.671371	60	138.462		180	bottom	0.525164	45	138.462
156	descent	0.673121	65	128.571		152	bottom	0.529915	35	163.636
180	descent	0.678322	62.5	138.462		180	bottom	0.532276	47.5	120
173	descent	0.679846	62.5	128.571		156	bottom	0.532567	40	78.2609
153	descent	0.684476	57.5	128.571		152	bottom	0.537749	45	163.636
152	descent	0.684481	65	128.571		180	bottom	0.540481	50	150
156	descent	0.689066	65	138.462		152	bottom	0.545584	42.5	163.636
173	descent	0.693346	60	138.462		180	bottom	0.547046	42.5	163.636
180	descent	0.693473	60	138.462		180	bottom	0.553063	47.5	163.636
153	descent	0.698589	60	128.571		152	bottom	0.553419	35	163.636
152	descent	0.698869	70	128.571		156	bottom	0.554598	50	163.636
156	descent	0.703872	62.5	128.571		180	bottom	0.559081	40	150
173	descent	0.705882	57.5	128.571		152	bottom	0.561254	32.5	128.571
180	descent	0.708625	60	138.462		173	bottom	0.563559	50	112.5
153	descent	0.712702	57.5	138.462		156	bottom	0.565134	40	163.636
152	descent	0.713258	70	128.571		180	bottom	0.565646	45	163.636
173	descent	0.719383	62.5	128.571		173	bottom	0.571092	40	1.74927
156	descent	0.719818	65	138.462		152	bottom	0.571225	42.5	138.462
180	descent	0.723776	60	128.571		180	bottom	0.571663	45	150
153	descent	0.725806	57.5	128.571		156	bottom	0.57567	35	138.462
152	descent	0.727646	60	138.462		180	bottom	0.578228	40	138.462
173	descent	0.732883	60	128.571		152	bottom	0.580484	47.5	163.636
156	descent	0.734624	62.5	128.571		180	bottom	0.585339	47.5	150
153	descent	0.739919	62.5	138.462		156	bottom	0.588123	35	120
180	descent	0.740093	60	138.462		152	bottom	0.588319	40	138.462
152	descent	0.741007	60	128.571		173	bottom	0.591337	52.5	138.462
173	descent	0.746384	62.5	138.462		180	bottom	0.591904	50	150
156	descent	0.750569	60	128.571		173	bottom	0.597458	52.5	138.462
153	descent	0.753024	55	128.571		152	bottom	0.597578	35	138.462
180	descent	0.755245	57.5	120		180	bottom	0.598468	45	163.636
152	descent	0.755396	65	128.571		156	bottom	0.60249	47.5	128.571
173	descent	0.75892	57.5	128.571		173	bottom	0.603578	52.5	150
156	descent	0.766515	60	120		180	bottom	0.604486	45	163.636
153	descent	0.767137	60	128.571		152	bottom	0.606838	45	163.636
152	descent	0.769784	65	128.571		173	bottom	0.609228	50	150
173	descent	0.77242	62.5	128.571		180	bottom	0.610503	42.5	58.0645
180	descent	0.772727	60	128.571		152	bottom	0.614672	37.5	150
153	descent	0.78125	60	128.571		173	bottom	0.614878	47.5	180
156	descent	0.783599	62.5	138.462		156	bottom	0.6159	40	100
152	descent	0.784173	62.5	138.462		173	bottom	0.619586	47.5	150
173	descent	0.785921	60	128.571		152	bottom	0.623219	50	150
180	descent	0.789044	62.5	128.571		173	bottom	0.625235	40	163.636
153	descent	0.795363	62.5	112.5		180	bottom	0.627462	42.5	163.636
152	descent	0.797533	62.5	120		173	bottom	0.630414	40	150
156	descent	0.798405	67.5	128.571		152	bottom	0.631766	40	150
173	descent	0.799421	62.5	120		156	bottom	0.633142	45	150
180	descent	0.805361	62.5	138.462		180	bottom	0.633479	40	112.5
153	descent	0.811492	60	128.571		173	bottom	0.636064	42.5	163.636
152	descent	0.81295	62.5	138.462		152	bottom	0.640313	35	163.636
173	descent	0.813886	62.5	128.571		173	bottom	0.641243	47.5	150
156	descent	0.814351	65	128.571		180	bottom	0.642232	52.5	150
180	descent	0.820513	60	138.462		156	bottom	0.644636	52.5	138.462
153	descent	0.825605	57.5	120		173	bottom	0.646893	37.5	150
152	descent	0.82631	67.5	120		152	bottom	0.648148	37.5	163.636
173	descent	0.827387	55	112.5		180	bottom	0.648796	42.5	163.636
156	descent	0.830296	57.5	128.571		173	bottom	0.652542	40	163.636
180	descent	0.835664	60	128.571		180	bottom	0.654814	37.5	180
153	descent	0.840726	50	120		152	bottom	0.655983	32.5	72
152	descent	0.841727	65	138.462		156	bottom	0.657088	40	150
173	descent	0.842816	57.5	105.882		173	bottom	0.657721	42.5	150
156	descent	0.846241	57.5	128.571		180	bottom	0.660284	37.5	180
180	descent	0.851981	62.5	138.462		173	bottom	0.663371	47.5	138.462
152	descent	0.855087	55	120		180	bottom	0.665755	47.5	150
153	descent	0.855847	42.5	120		156	bottom	0.668582	45	163.636
173	descent	0.859209	62.5	120		173	bottom	0.669492	42.5	150
156	descent	0.862187	55	128.571		180	bottom	0.672319	35	180
180	descent	0.867133	62.5	128.571		152	bottom	0.673789	50	163.636
152	descent	0.870504	57.5	120		173	bottom	0.675141	50	150
153	descent	0.870968	62.5	120		180	bottom	0.67779	37.5	163.636
173	descent	0.873674	57.5	120		156	bottom	0.679119	42.5	163.636
156	descent	0.878132	57.5	128.571		173	bottom	0.680791	50	180
180	descent	0.88345	50	138.462		152	bottom	0.681624	47.5	138.462
152	descent	0.88592	60	128.571		180	bottom	0.683807	40	200
153	descent	0.886089	60	112.5		173	bottom	0.685499	35	180
173	descent	0.888139	62.5	112.5		180	bottom	0.688731	42.5	163.636
156	descent	0.894077	62.5	120		156	bottom	0.689655	30	138.462
180	descent	0.898601	57.5	138.462		173	bottom	0.690207	40	180
152	descent	0.900308	55	120		152	bottom	0.690883	42.5	150
153	descent	0.902218	52.5	112.5		180	bottom	0.694748	42.5	163.636
173	descent	0.903568	47.5	81.8182		173	bottom	0.694915	40	163.636
156	descent	0.911162	55	112.5		152	bottom	0.69943	40	150
180	descent	0.913753	57.5	128.571		173	bottom	0.700094	52.5	163.636
152	descent	0.915725	47.5	105.882		180	bottom	0.700766	40	150
153	descent	0.918347	57.5	100		156	bottom	0.702107	45	180
173	descent	0.924783	52.5	120		173	bottom	0.705273	40	128.571
156	descent	0.929385	57.5	128.571		180	bottom	0.70733	42.5	150
180	descent	0.93007	57.5	112.5		152	bottom	0.707977	35	138.462
152	descent	0.933196	60	112.5		156	bottom	0.711686	40	150
153	descent	0.936492	62.5	100		173	bottom	0.711864	45	128.571
173	descent	0.939248	52.5	100		180	bottom	0.713895	42.5	163.636
156	descent	0.94533	57.5	100		152	bottom	0.717236	40	150
180	descent	0.948718	55	138.462		173	bottom	0.718456	52.5	163.636
152	descent	0.94964	60	120		180	bottom	0.719912	40	180
153	descent	0.954637	52.5	138.462		156	bottom	0.72318	47.5	163.636
173	descent	0.956606	55	120		173	bottom	0.723635	52.5	128.571
180	descent	0.963869	57.5	100		180	bottom	0.725383	40	150
152	descent	0.965057	55	112.5		152	bottom	0.725783	40	150
156	descent	0.965831	55	120		173	bottom	0.730226	45	150
153	descent	0.967742	45	100		180	bottom	0.731947	35	200
173	descent	0.97107	57.5	128.571		156	bottom	0.733716	45	163.636
152	descent	0.981501	60	100		152	bottom	0.73433	45	150
156	descent	0.982916	60	120		173	bottom	0.735876	45	150
173	descent	0.984571	55	112.5		180	bottom	0.736871	40	200
180	descent	0.984848	57.5	138.462		173	bottom	0.741525	52.5	138.462
153	descent	0.985887	55	128.571		180	bottom	0.741794	47.5	200
152	descent	1	50	60		152	bottom	0.742877	50	163.636
153	descent	1	52.5	90		156	bottom	0.744253	35	163.636
180	descent	1	52.5	128.571		180	bottom	0.746718	40	200
156	descent	1	60	128.571		173	bottom	0.747646	47.5	105.882
173	descent	1	52.5	128.571		152	bottom	0.750712	40	150
						180	bottom	0.751641	42.5	180
						156	bottom	0.754789	42.5	163.636
						173	bottom	0.75565	45	150
						180	bottom	0.757112	42.5	180
						152	bottom	0.759259	52.5	180
						173	bottom	0.761299	47.5	150
						180	bottom	0.762582	37.5	200
						156	bottom	0.765326	40	163.636
						152	bottom	0.766382	37.5	105.882
						173	bottom	0.766949	47.5	163.636
						180	bottom	0.767505	40	163.636
						173	bottom	0.772128	45	150
						180	bottom	0.773523	42.5	200
						156	bottom	0.775862	42.5	138.462
						173	bottom	0.777778	40	150
						180	bottom	0.778446	35	180
						152	bottom	0.77849	42.5	163.636
						173	bottom	0.783427	45	180
						180	bottom	0.783917	35	163.636
						152	bottom	0.786325	45	150
						173	bottom	0.788136	42.5	163.636
						156	bottom	0.788314	42.5	163.636
						180	bottom	0.789934	42.5	180
						173	bottom	0.793315	37.5	200
						152	bottom	0.794872	45	150
						180	bottom	0.795405	40	180
						173	bottom	0.797552	42.5	225
						156	bottom	0.798851	40	150
						180	bottom	0.800875	45	81.8182
						173	bottom	0.801318	50	100
						152	bottom	0.803419	45	163.636
						173	bottom	0.809793	25	180
						156	bottom	0.810345	40	163.636
						152	bottom	0.811254	32.5	150
						180	bottom	0.81291	47.5	163.636
						173	bottom	0.814501	52.5	180
						180	bottom	0.818928	32.5	163.636
						173	bottom	0.819209	52.5	120
						152	bottom	0.819801	40	180
						156	bottom	0.820881	37.5	180
						180	bottom	0.824945	37.5	150
						173	bottom	0.826271	37.5	163.636
						152	bottom	0.826923	45	180
						156	bottom	0.83046	40	138.462
						173	bottom	0.83145	47.5	128.571
						180	bottom	0.83151	35	150
						152	bottom	0.834046	42.5	180
						173	bottom	0.838041	45	163.636
						180	bottom	0.838074	50	200
						152	bottom	0.841168	42	163.636
						156	bottom	0.842912	40	150
						180	bottom	0.842998	32.5	163.636
						173	bottom	0.84322	47.5	180
						173	bottom	0.847928	47.5	163.636
						152	bottom	0.849003	40	163.636
						180	bottom	0.849015	40	163.636
						173	bottom	0.853107	47.5	150
						156	bottom	0.854406	45	163.636
						180	bottom	0.855033	47.5	75
						152	bottom	0.856838	42.5	150
						173	bottom	0.858757	42.5	163.636
						173	bottom	0.863936	50	163.636
						156	bottom	0.864943	42.5	200
						152	bottom	0.865385	37.5	120
						180	bottom	0.868162	47.5	128.571
						173	bottom	0.869115	45	200
						173	bottom	0.873352	60	225
						156	bottom	0.873563	35	180
						180	bottom	0.875821	50	138.462
						152	bottom	0.876068	45	163.636
						173	bottom	0.877119	57.5	225
						173	bottom	0.880885	45	225
						180	bottom	0.882932	52.5	150
						156	bottom	0.883142	45	180
						152	bottom	0.883903	50	138.462
						173	bottom	0.884652	35	257.143
						173	bottom	0.887947	45	225
						180	bottom	0.889497	47.5	163.636
						173	bottom	0.891714	52.5	225
						156	bottom	0.89272	45	163.636
						152	bottom	0.893162	35	128.571
						173	bottom	0.89548	40	27.2727
						180	bottom	0.895514	50	180
						180	bottom	0.900985	40	163.636
						152	bottom	0.903134	45	163.636
						156	bottom	0.903257	40	200
						180	bottom	0.907002	47.5	128.571
						152	bottom	0.910969	50	100
						156	bottom	0.911877	42.5	200
						180	bottom	0.914661	42.5	150
						156	bottom	0.920498	35	33.9623
						180	bottom	0.921225	45	150
						152	bottom	0.923789	45	163.636
						173	bottom	0.926554		46.1538
						180	bottom	0.92779	50	163.636
						152	bottom	0.931624	57.5	180
						180	bottom	0.933807	50	163.636
						152	bottom	0.938746	15	39.1304
						180	bottom	0.939825	40	150
						173	bottom	0.944915	70	150
						180	bottom	0.946389	37.5	180
						173	bottom	0.950565	70	138.462
						180	bottom	0.95186	45	180
						173	bottom	0.956685	60	128.571
						180	bottom	0.95733	45	150
						173	bottom	0.963277	50	47.3684
						180	bottom	0.963895	40	163.636
						180	bottom	0.969912	42.5	163.636
						156	bottom	0.971264	40	112.5
						152	bottom	0.97151	57.5	90
						180	bottom	0.97593	45	75
						173	bottom	0.981168		45
						152	bottom	0.985755	42.5	90
						156	bottom	0.98659	60	128.571
						180	bottom	0.989059	40	90
						152	bottom	1	45	72
						153	bottom	1		128.571
						180	bottom	1	50	85.7143
						156	bottom	1	70	30
						173	bottom	1	65	90
						173	bottom	1.05556	62.5	-1.82556

## Sheet: seafloor type
	coarse gravel		coarse sand / shellfish fragments		sediment ripples		fine sand		flat bottom		brittle stars		horse mussels / sponges		coral / anemonies		prey capture		prey pursuit
dive	in	out	in	out	in	out	in	out	in	out	in	out	in	out	in	out	in	out
149			14265	15781	14265	15781					14265	15781
151			23172	24174	23172	24174					23172	24174
152			28216	29528	28216	29528					28126	29528
153			33672	34765	33672	34765					33672	34765					34008	34765
154			38588	39675	38588	39675					38588	39675					38870	39675
155			43788	45083	43788	45083									44038	45083			44728	45098
156			48896	49967	48896	49967									48896	49967
157			53867	55283	53867	55283									54122	54489	54579	55283
158			59063	60739	59063	60739					59983	60095			59063	60179	60095	60739
159			64228	65742	64228	65742					64228	64248			64331	65742	64473	65742
161			71822	72798	71822	72798	72798	73596	72798	73596			72330	72392	71942
161			73596	73780	73596	73780
168			97457	98916	97547	98916	97119	97457	97119	97457	97119	97373	97119	97373
168													98439	98916
169	102514	103159	103159	103946					102514	103946	103159	103946	102514	103159
170	107462	108100	108100	108853	108100	108853			107462	108100	107462	108853	107462	108185
171			112294	113867	112294	113422			113422	113867	112294	113867
172			117639	119026	117639	119018	119026	119189	119026	119189	117639	119367	117727	118453					117892	118198
172			119189	119367									119189	119367
173			122868	124997	123639	124997			122868	123639	122868	124997			124110	124997	124715	124997
174			128449	130738	128449	130738					128449	130738			128449	130738			129712	129964		2.61944	3.41837
175			134268	136455	134268	136455					134488	136455			134488	136455	135101	135477
175																	136149	136455
176			139681	142048	139681	142048					139681	142048			139681	141279	140535	140942
176													141652	142048			141393	142048
177			146533	148040			146533	146610	146533	148040	146533	148040	146533	148040	146533	148040			147180	148040		2.85111	3.7207
178			151237	152765					151237	152765	151237	152765	151237	152765	151237	152765	152033	152765
179			156240	158092					156240	158092	156240	158092	156240	158092	156240	158092
180			161350	163192					161350	163192	161350	163192	161350	163192	161350	163192
181			166890	168807					166890	168807	166890	168807	166890	168807	166890	168807
182			172746	173015			172266	172746	172266	174275	172266	174275	172266	174275	172746	174275
182			173326	173595			173015	173326
182			173895	174275			173595	173895
183	179698	179798	181143	181728	179698	179798	179798	181143	179798	181728	179698	181728	179698	181728	179862	181728			180108	180621		15.1906	19.8237
184			186138	187173	186554	187173			186138	186554	186138	187173			186138	187173	186729	187242	0.328333	0.0383333
185			190948	192913	190948	192913					190948	192913			190948	192913	191488	192219
186			197334	199708	197334	199708					197334	199708			197334	199708	199506	199708
187			203330	205392	203330	205392					204982	205392			203330	205392			204115	204651		2.44833	3.19507

## Sheet: seafloor graph
	coarse gravel		coarse sand / shellfish fragments		sediment ripples		fine sand		flat bottom		brittle stars		horse mussels / sponges		coral / anemonies		prey capture		prey pursuit
dive	in	out	in	out	in	out	in	out	in	out	in	out	in	out	in	out	in	out	in	out
149			0	0.842222	0	0.842222					0	0.842222
151			0.842222	1.39889	0.842222	1.39889					0.842222	1.39889
152			1.44889	2.17778	1.44889	2.17778					1.39889	2.17778
153			2.17778	2.785	2.17778	2.785					2.17778	2.785					2.36444	2.785
154			2.785	3.38889	2.785	3.38889					2.785	3.38889					2.94167	3.38889
155			3.38889	4.10833	3.38889	4.10833									3.52778	4.10833			3.9	4.1
156			4.10833	4.70333	4.10833	4.70333									4.10833	4.70333
157			4.70333	5.49	4.70333	5.49									4.845	5.04889	5.09889	5.49
158			5.49	6.42111	5.49	6.42111					6.00111	6.06333			5.49	6.11	6.06333	6.42111
159			6.42111	7.26222	6.42111	7.26222					6.42111	6.5			6.47833	7.26222	6.55722	7.26222
161			7.26222	7.80444	7.26222	7.80444	7.80444	8.24778	7.80444	8.24778			7.54444	7.57889	7.32889	7.78611
161			8.24778	8.35	8.24778	8.35
168			8.43556	9.24611	8.41778	9.24611	8.24778	8.43556	8.24778	8.43556	8.24778		8.24778	8.38889
168													9	9.2
169	9.2	9.55833	9.55833	9.99556					9.2	9.99556	9.55833	9.99556	9.2	9.55833
170	9.99556	10.35	10.35	10.7683	10.35	10.7683			9.99556	10.35	9.99556	10.7683	9.99556	10.3972
171			10.7683	11.6422	10.7683	11.395			11.395	11.6422	10.7683	11.6422
172			11.6422	12.4128	11.6422	12.4083	12.4128	12.5033	12.4128	12.5033	11.6422	12.6022	11.6911	12.0944					11.8	12
172			12.5	12.6
173			12.6	13.7828	13.0283	13.7828			12.6	13.0283	12.6	13.7828			13.29	13.7828	13.6261	13.7828
174			13.7828	15.0544	13.7828	15.0544					13.7828	15.0544			13.7828	15.0544			14.4828	14.6544
175			15.0544	16.2694	15.0544	16.2694					15.1767	16.2694			15.1767	16.2694	15.5172	15.7261
175																	16.1	16.3
176			16.2694	17.5844	16.2694	17.5844					16.2694	17.5844			16.2694	17.1572	16.7439	16.97
176													17.4	17.6			17.2	17.6
177			17.6	18.4372			17.6	17.6428	17.6	18.4372	17.6	18.4372	17.6	18.4372	17.6	18.4372			18	18.4
178			18.4372	19.2861					18.4372	19.2861	18.4372	19.2861	18.4372	19.2861	18.4372	19.2861	18.8794	19.2861
179			19.2861	20.315					19.2861	20.315	19.2861	20.315	19.2861	20.315	19.2861	20.315
180			20.315	21.3383					20.315	21.3383	20.315	21.3383	20.315	21.3383	20.315	21.3383
181			21.3383	22.4033					21.3383	22.4033	21.3383	22.4033	21.3383	22.4033	21.3383	22.4033
182			22.67	22.8194			22.4033	22.67	22.4033	23.5194	22.4033	23.5194	22.4033	23.5194	22.67	23.5194
182			23	23.1			22.8	23
182			23.3	23.5			23.1	23.3
183	23.5	23.5556	24.3028	24.6278	23.5	23.5556	23.5556	24.3028	23.5556	24.6278	23.5	24.6278	23.5	24.6278	23.5911	24.6278			23.7	24
184			24.6278	25.2028	24.8589	25.2028			24.6278	24.8589	24.6278	25.2028			24.6278	25.2028	24.9	25.2
185			25.2028	26.2944	25.2028	26.2944					25.2028	26.2944			25.2028	26.2944	25.5028	25.9089
186			26.2944	27.6133	26.2944	27.6133					26.2944	27.6133			26.2944	27.6133	27.5011	27.6133
187			27.6133	28.7589	27.6133	28.7589					28.5311	28.7589			27.6133	28.7589			28	28.4
																	14		6

## Sheet: seafloor stats
dive	coarse gravel	coarse sand / shellfish fragments	fine sand		sediment ripples	flat bottom		brittle stars	horse mussels / sponges	coral / anemonies		opalfish capture	blue cod capture	prey pursuit		Bottom time	coarse gravel	coarse sand / shellfish fragments	fine sand		sediment ripples	flat bottom		brittle stars	horse mussels / sponges	coral / anemonies	prey capture
149		50.5333			50.5333			50.5333								50.5333	0	1	0		1	0		1	0	0	0
151		33.4			33.4			33.4								33.4	0	1	0		1	0		1	0	0	0
152		43.7333			43.7333			46.7333								46.7333	0	0.935806	0		0.935806	0		1	0	0	0
153		36.4333			36.4333			36.4333				25.2333				36.4333	0	1	0		1	0		1	0	0	0.692589
154		36.2333			36.2333			36.2333				26.8333				36.2333	0	1	0		1	0		1	0	0	0.74057
155		43.1667			43.1667					34.8333				12		43.1667	0	1	0		1	0		0	0	0.80695	0
156		35.7			35.7					35.7						35.7	0	1	0		1	0		0	0	1	0
157		47.2			47.2					12.2333		23.4667				47.2	0	1	0		1	0		0	0	0.259181	0.497175
158		55.8667			55.8667			3.73333		37.2						55.8667	0	1	0		1	0		0.0668258	0	0.665871	0
159		50.4667			50.4667			0.666667		47.0333		42.3				50.4667	0	1	0		1	0		0.01321	0	0.931968	0.838177
161		38.6	26.6		32.5333	26.6			2.06667							59.1333	0	0.652762	0.449831		0.550169	0.449831		0	0.0349493	0	0
168		48.6333	11.2667		45.6333	11.2667		8.46667	24.4							59.9	0	0.811909	0.188091		0.761825	0.188091		0.141347	0.407346	0	0
169	21.5	26.2333				47.7333		26.2333	21.5							47.7333	0.450419	0.549581	0		0	1		0.549581	0.450419	0	0
170	21.2667	25.1			25.1	21.2667		46.3667	24.1							46.3667	0.458663	0.541337	0		0.541337	0.458663		1	0.51977	0	0
171		52.4333			37.6	14.8333		52.4333								52.4333	0	1	0		0.717101	0.282899		1	0	0	0
172		52.1	5.43333		45.9667	5.43333		57.6	30.1					12		57.6	0	0.904514	0.0943287		0.798032	0.0943287		1	0.522569	0	0
173		70.9667			45.2667	25.7		70.9667		29.5667		9.4				70.9667	0	1	0		0.637858	0.362142		1	0	0.416628	0.132457
174		76.3			76.3			76.3		76.3				10.2		76.3	0	1	0		1	0		1	0	1	0
175		72.9			72.9			65.5667		65.5667		22.7				72.9	0	1	0		1	0		0.899406	0	0.899406	0.311385
176		78.9			78.9			78.9	13.2	53.2667			35.4			78.9	0	1	0		1	0		1	0.1673	0.675116	0.448669
177		50.2333	2.56667			50.2333		50.2333	50.2333	50.2333				24		50.2333	0	1	0.0510949		0	1		1	1	1	0
178		50.9333				50.9333		50.9333	50.9333	50.9333			24.4			50.9333	0	1	0		0	1		1	1	1	0.479058
179		61.7333				61.7333		61.7333	61.7333	61.7333						61.7333	0	1	0		0	1		1	1	1	0
180		61.4				61.4		61.4	61.4	61.4						61.4	0	1	0		0	1		1	1	1	0
181		63.9				63.9		63.9	63.9	63.9						63.9	0	1	0		0	1		1	1	1	0
182		30.7	36.4			66.9667		66.9667	66.9667	50.9667						66.9667	0	0.458437	0.543554		0	1		1	1	0.761075	0
183	3.33333	19.5	44.8333		3.33333	64.3333		67.6667	67.6667	62.2				18		67.6667	0.0492611	0.288177	0.662562		0.0492611	0.950739		1	1	0.919212	0
184		34.5			20.6333	13.8667		34.5		34.5						34.5	0	1	0		0.598068	0.401932		1	0	1	0
185		65.5			65.5			65.5		65.5		24.3667				65.5	0	1	0		1	0		1	0	1	0.37201
186		79.1333			79.1333			79.1333		79.1333		6.73333				79.1333	0	1	0		1	0		1	0	1	0.0850885
187		68.7333			68.7333			13.6667		68.7333				24		68.7333	0	1	0		1	0		0.198836	0	1	0
	46.1	1561.17	127.1		1130.27	586.2		1306.2	538.2	1040.93		181.033	59.8	100.2	341.033	1728.67
	0.026668	0.903105	0.0735249		0.653837	0.339105		0.755611	0.311338	0.60216		0.104724	0.0345931	0.0579637
